# Supplementary material for: Global transcriptome and gene co-expression network analyses reveal regulatory and non-additive effects of drought and heat stress in grapevine
Source: PubMed Central journal article supplement (PMC9932518; doi:10.3389/fpls.2023.1096225), 2023-02-02
Supplement: Image_3.pdf [file Image_3.pdf]

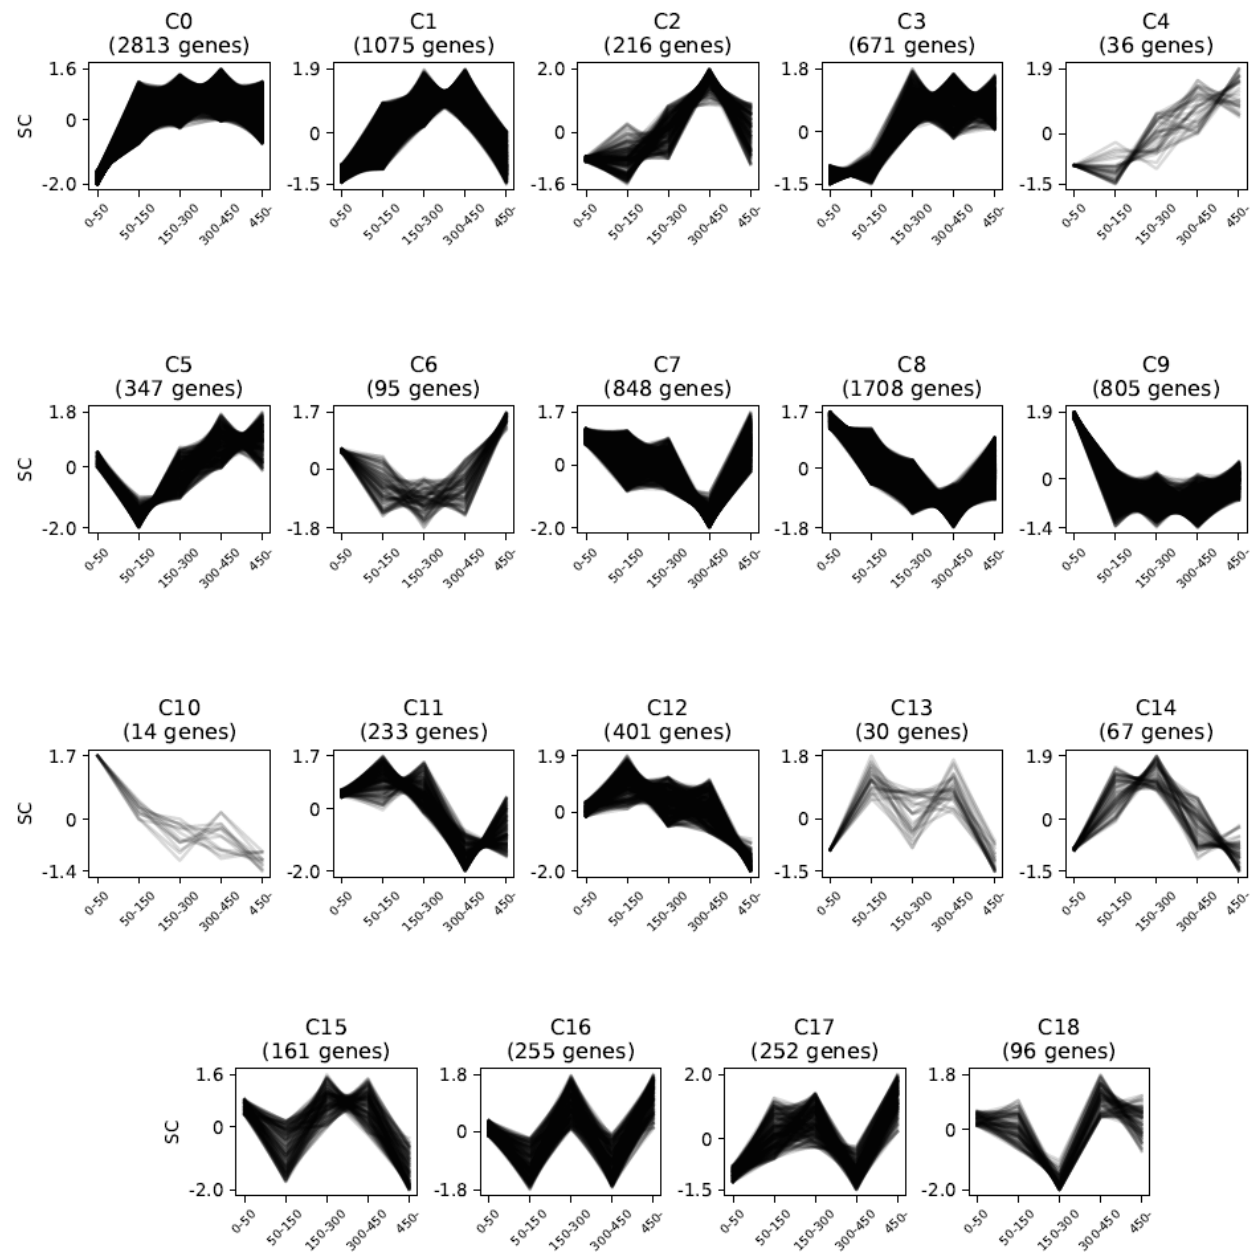

**Supplemental Figure S3. Clust analysis of gene clusters related to stomatal conductance.** A total of 18 clusters were identified. X axis shows stomatal conductance and Y axis shows transcript per million values.
