# Supplementary material for: Global transcriptome and gene co-expression network analyses reveal regulatory and non-additive effects of drought and heat stress in grapevine
Source: PubMed Central journal article supplement (PMC9932518; doi:10.3389/fpls.2023.1096225), 2023-02-02
Supplement: Image_4.pdf [file Image_4.pdf]

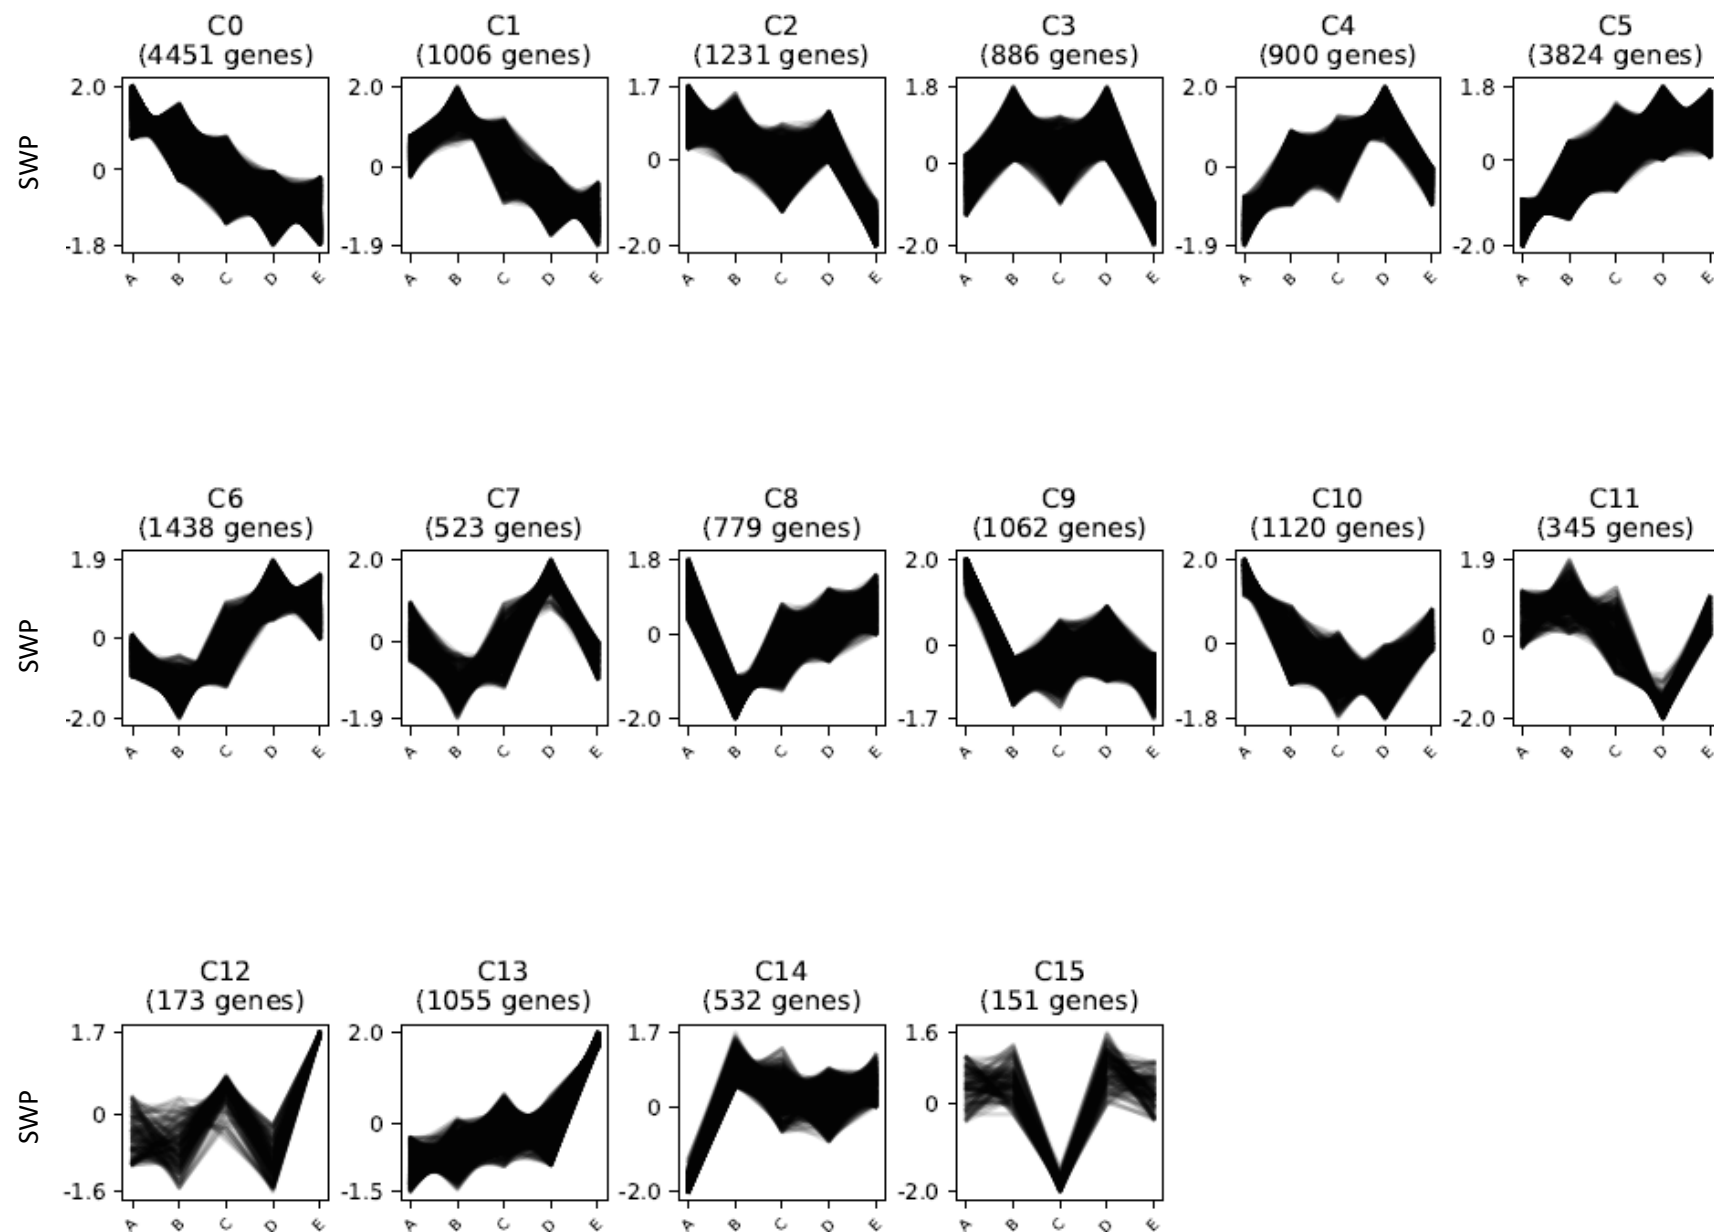

**Supplemental Figure S4. Clust analysis of gene clusters related to stem water potential.** A total of 15 clusters were identified. X axis shows stem water potential and Y axis shows transcript per million values. A is -1.2 to -1.0, B is -1.0 to -0.8, C is -0.8 to -0.6, D is -0.6 to -0.4, E is -0.4 to -0.29)
