# Supplementary material for: Global transcriptome and gene co-expression network analyses reveal regulatory and non-additive effects of drought and heat stress in grapevine
Source: PubMed Central journal article supplement (PMC9932518; doi:10.3389/fpls.2023.1096225), 2023-02-02
Supplement: Image_5.pdf [file Image_5.pdf]

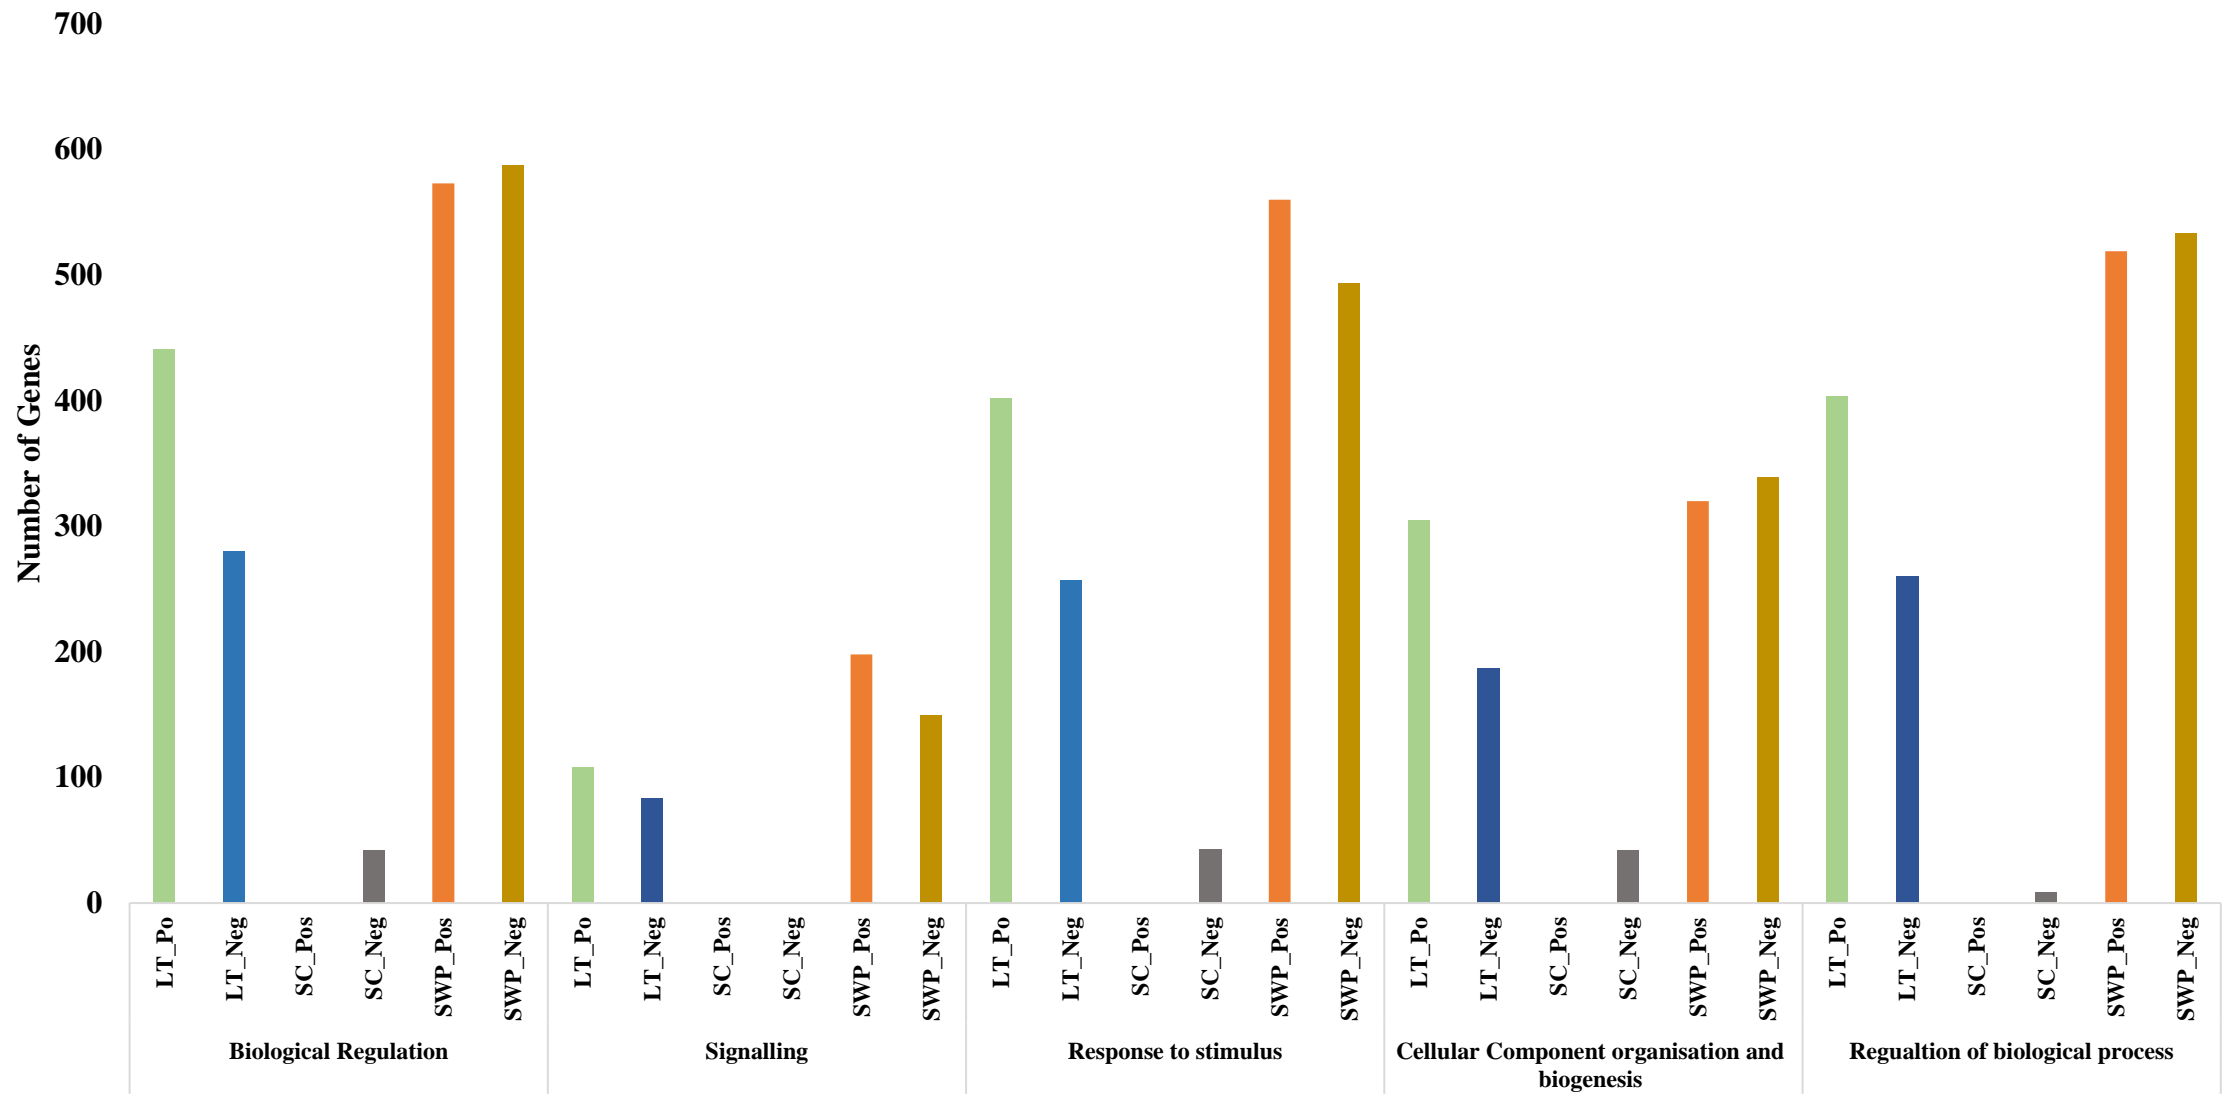

**Supplemental Figure S5.** AgriGO biological process analysis of all six co-expressed clusters: leaf temperature (LT), stomatal conductance (SC) and stem water potential (SWP). Positive correlations are indicated as (Pos) and negative correlation (Neg). (top 5 processes are shown here).
