# Supplementary material for: Global transcriptome and gene co-expression network analyses reveal regulatory and non-additive effects of drought and heat stress in grapevine
Source: PubMed Central journal article supplement (PMC9932518; doi:10.3389/fpls.2023.1096225), 2023-02-02
Supplement: Image_7.pdf [file Image_7.pdf]

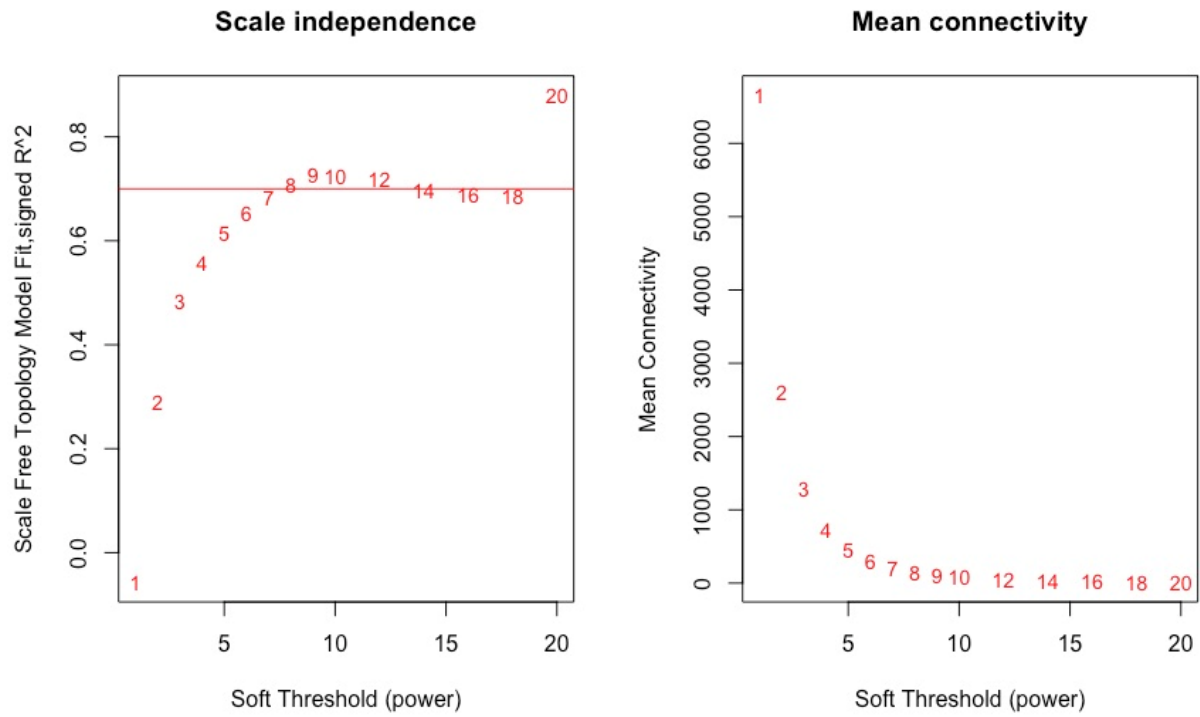

**Supplemental Figure S7.** Finding the soft-thresholding power. (a) Analyzing the scale-free fit index under the different soft-thresholding power ( $\beta$ ). (b) Analyzing mean connectivity using different soft-thresholding powers.
