# Supplementary material for: Global transcriptome and gene co-expression network analyses reveal regulatory and non-additive effects of drought and heat stress in grapevine
Source: PubMed Central journal article supplement (PMC9932518; doi:10.3389/fpls.2023.1096225), 2023-02-02
Supplement: Image_8.pdf [file Image_8.pdf]

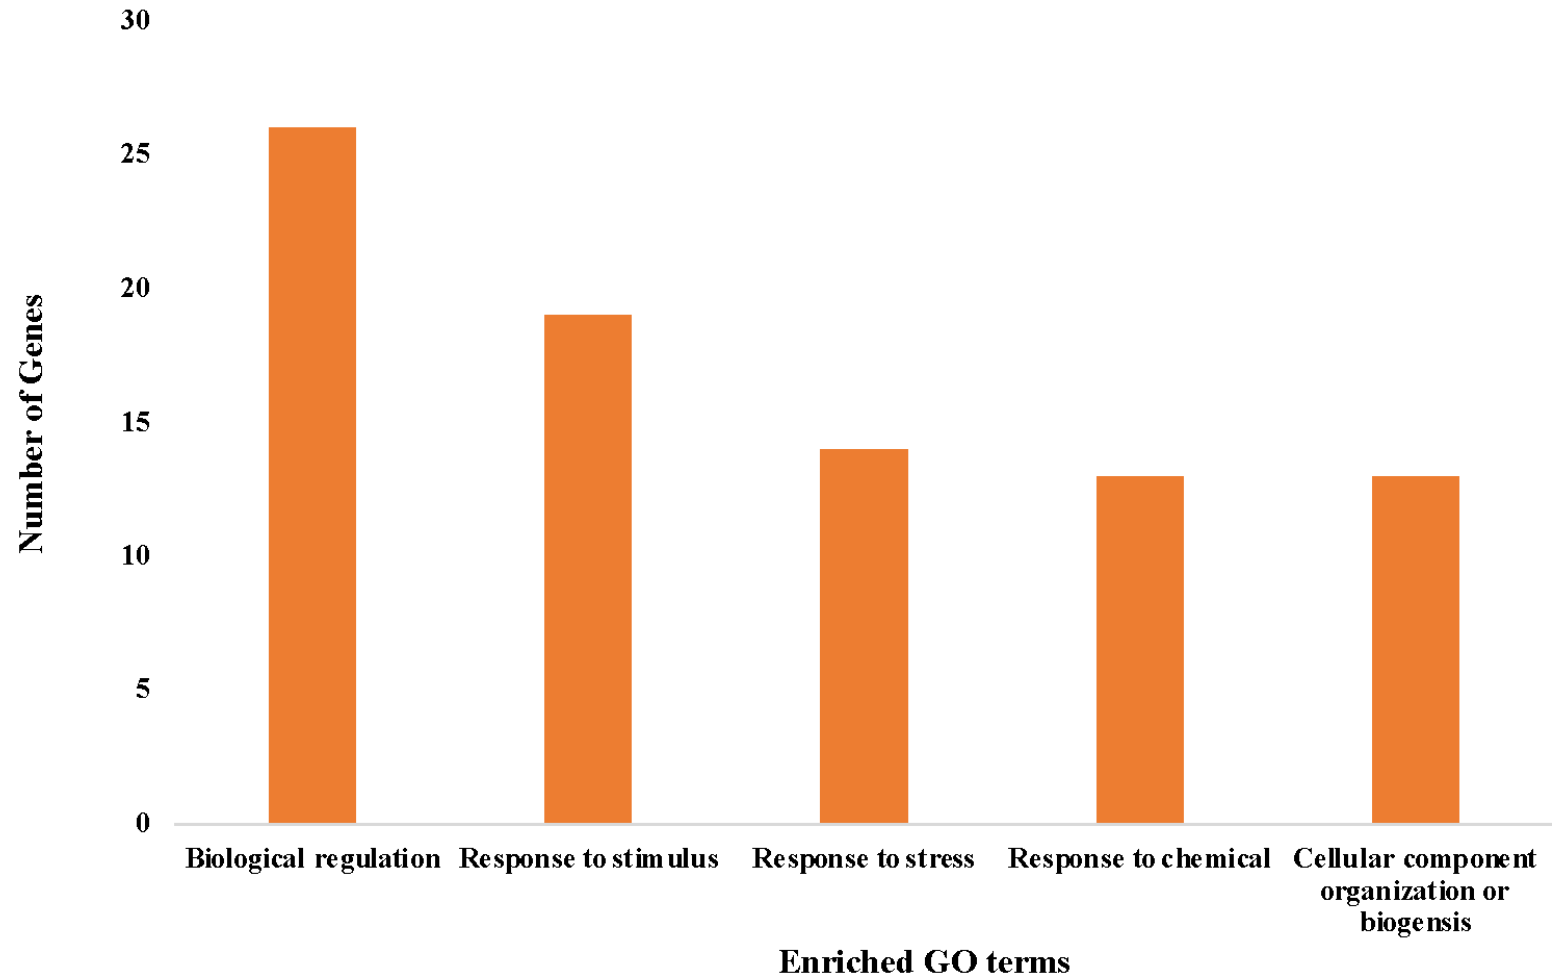

**Supplemental Figure S8.** AgriGO biological Process analysis of ‘darkmagenta’ module (top 5 processes are shown here).
