# Supplementary material for: Global transcriptome and gene co-expression network analyses reveal regulatory and non-additive effects of drought and heat stress in grapevine
Source: PubMed Central journal article supplement (PMC9932518; doi:10.3389/fpls.2023.1096225), 2023-02-02
Supplement: Image_9.pdf [file Image_9.pdf]

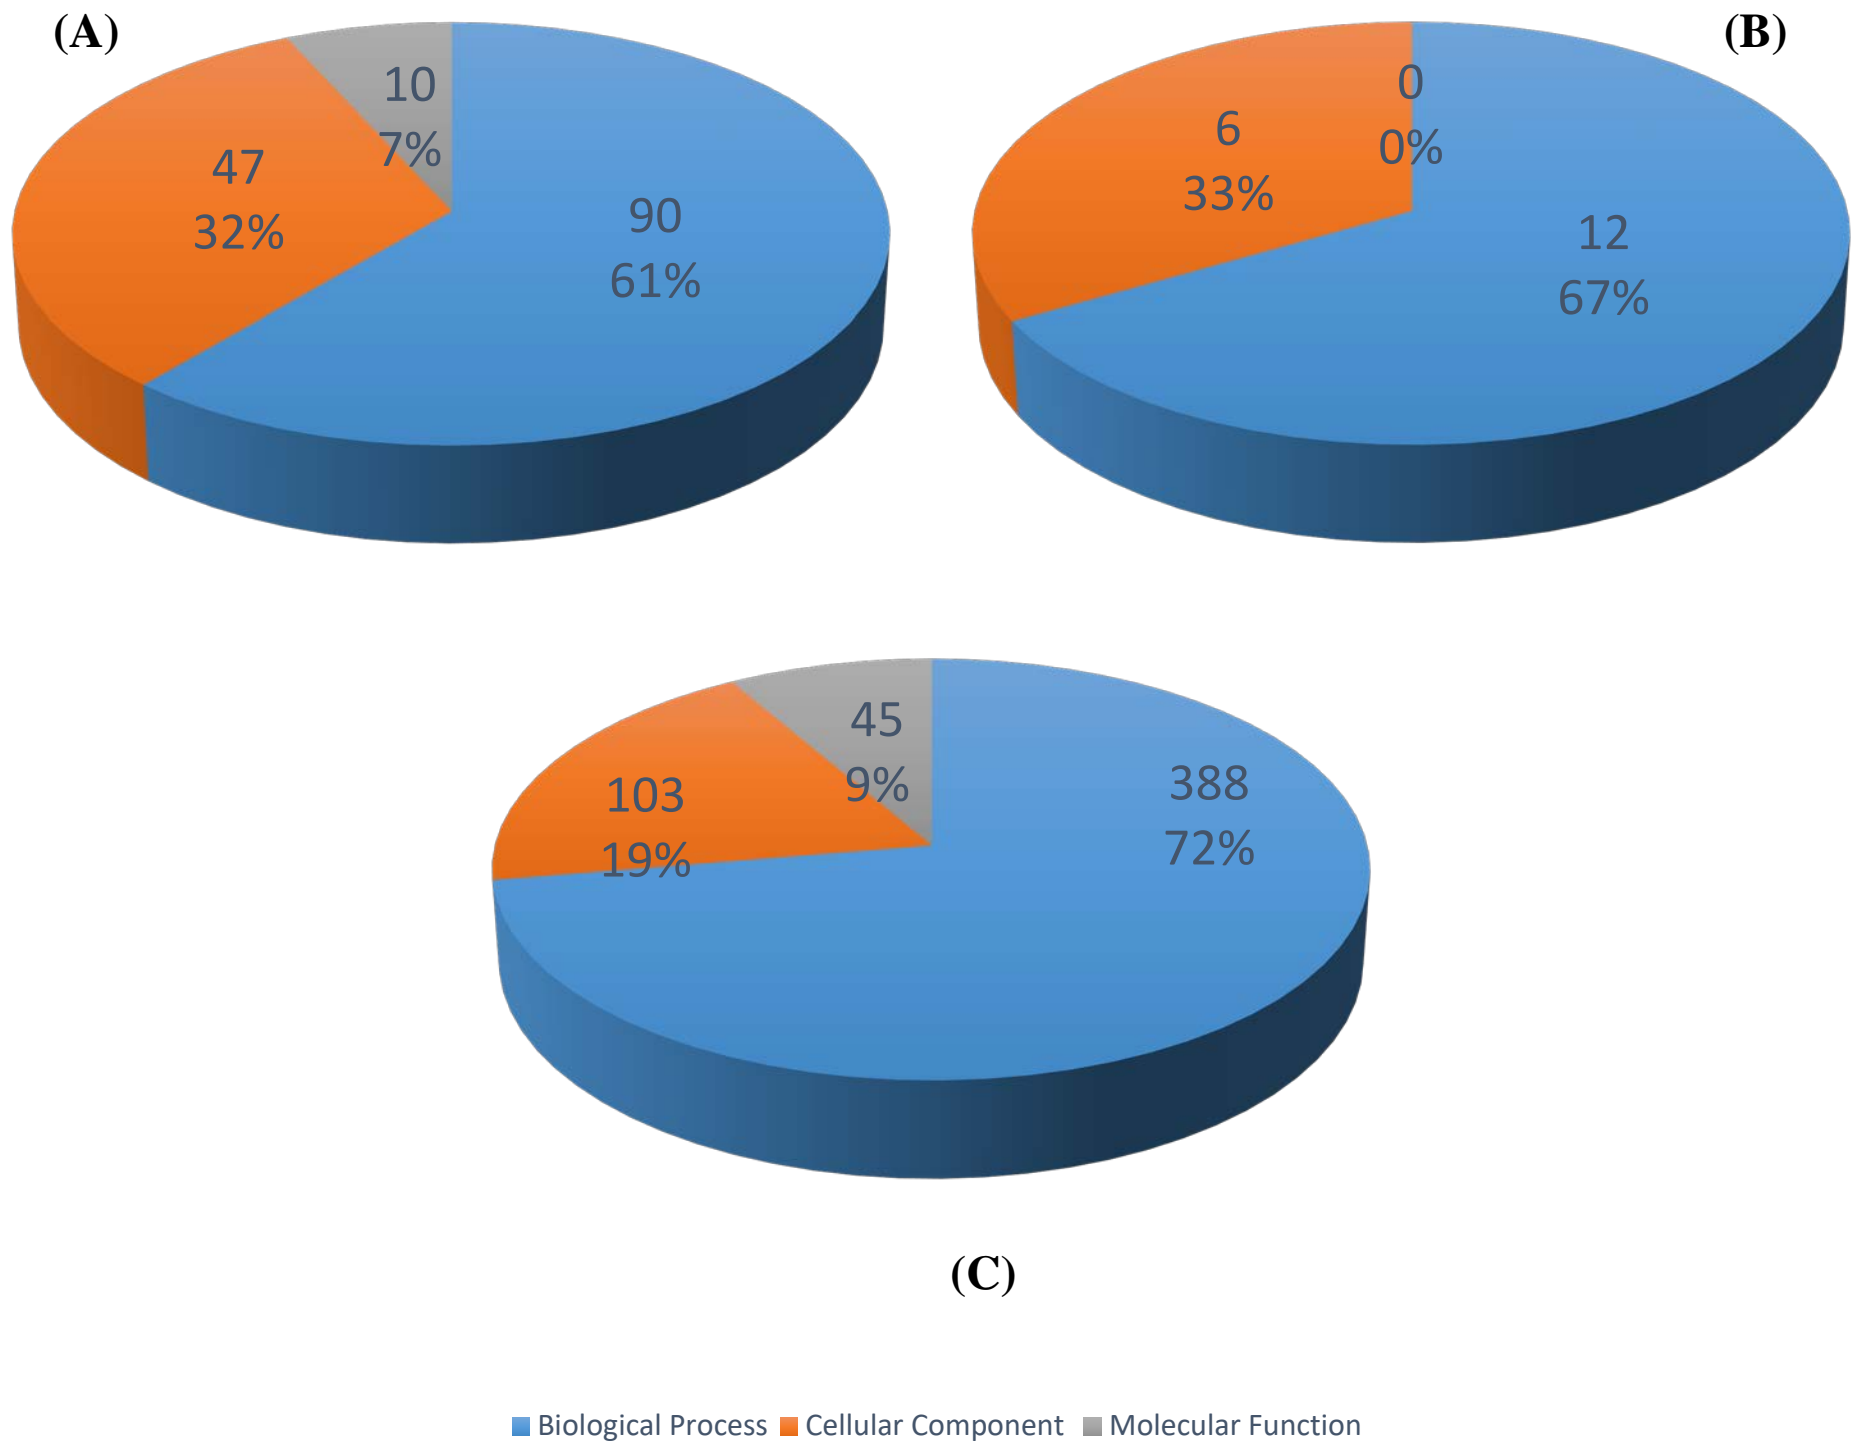

**Supplemental Figure S9.** Percentage distribution of significant GO terms (DEGs) based on biological process, cellular component and molecular function. (A) GO terms identified with AgriGO under drought treatment; (B) Heat; (C) Combined.  $P_{adj}\text{-value} \leq 0.05$ .
