# Supplementary material for: Global transcriptome and gene co-expression network analyses reveal regulatory and non-additive effects of drought and heat stress in grapevine
Source: PubMed Central journal article supplement (PMC9932518; doi:10.3389/fpls.2023.1096225), 2023-02-02
Supplement: Image_10.pdf [file Image_10.pdf]

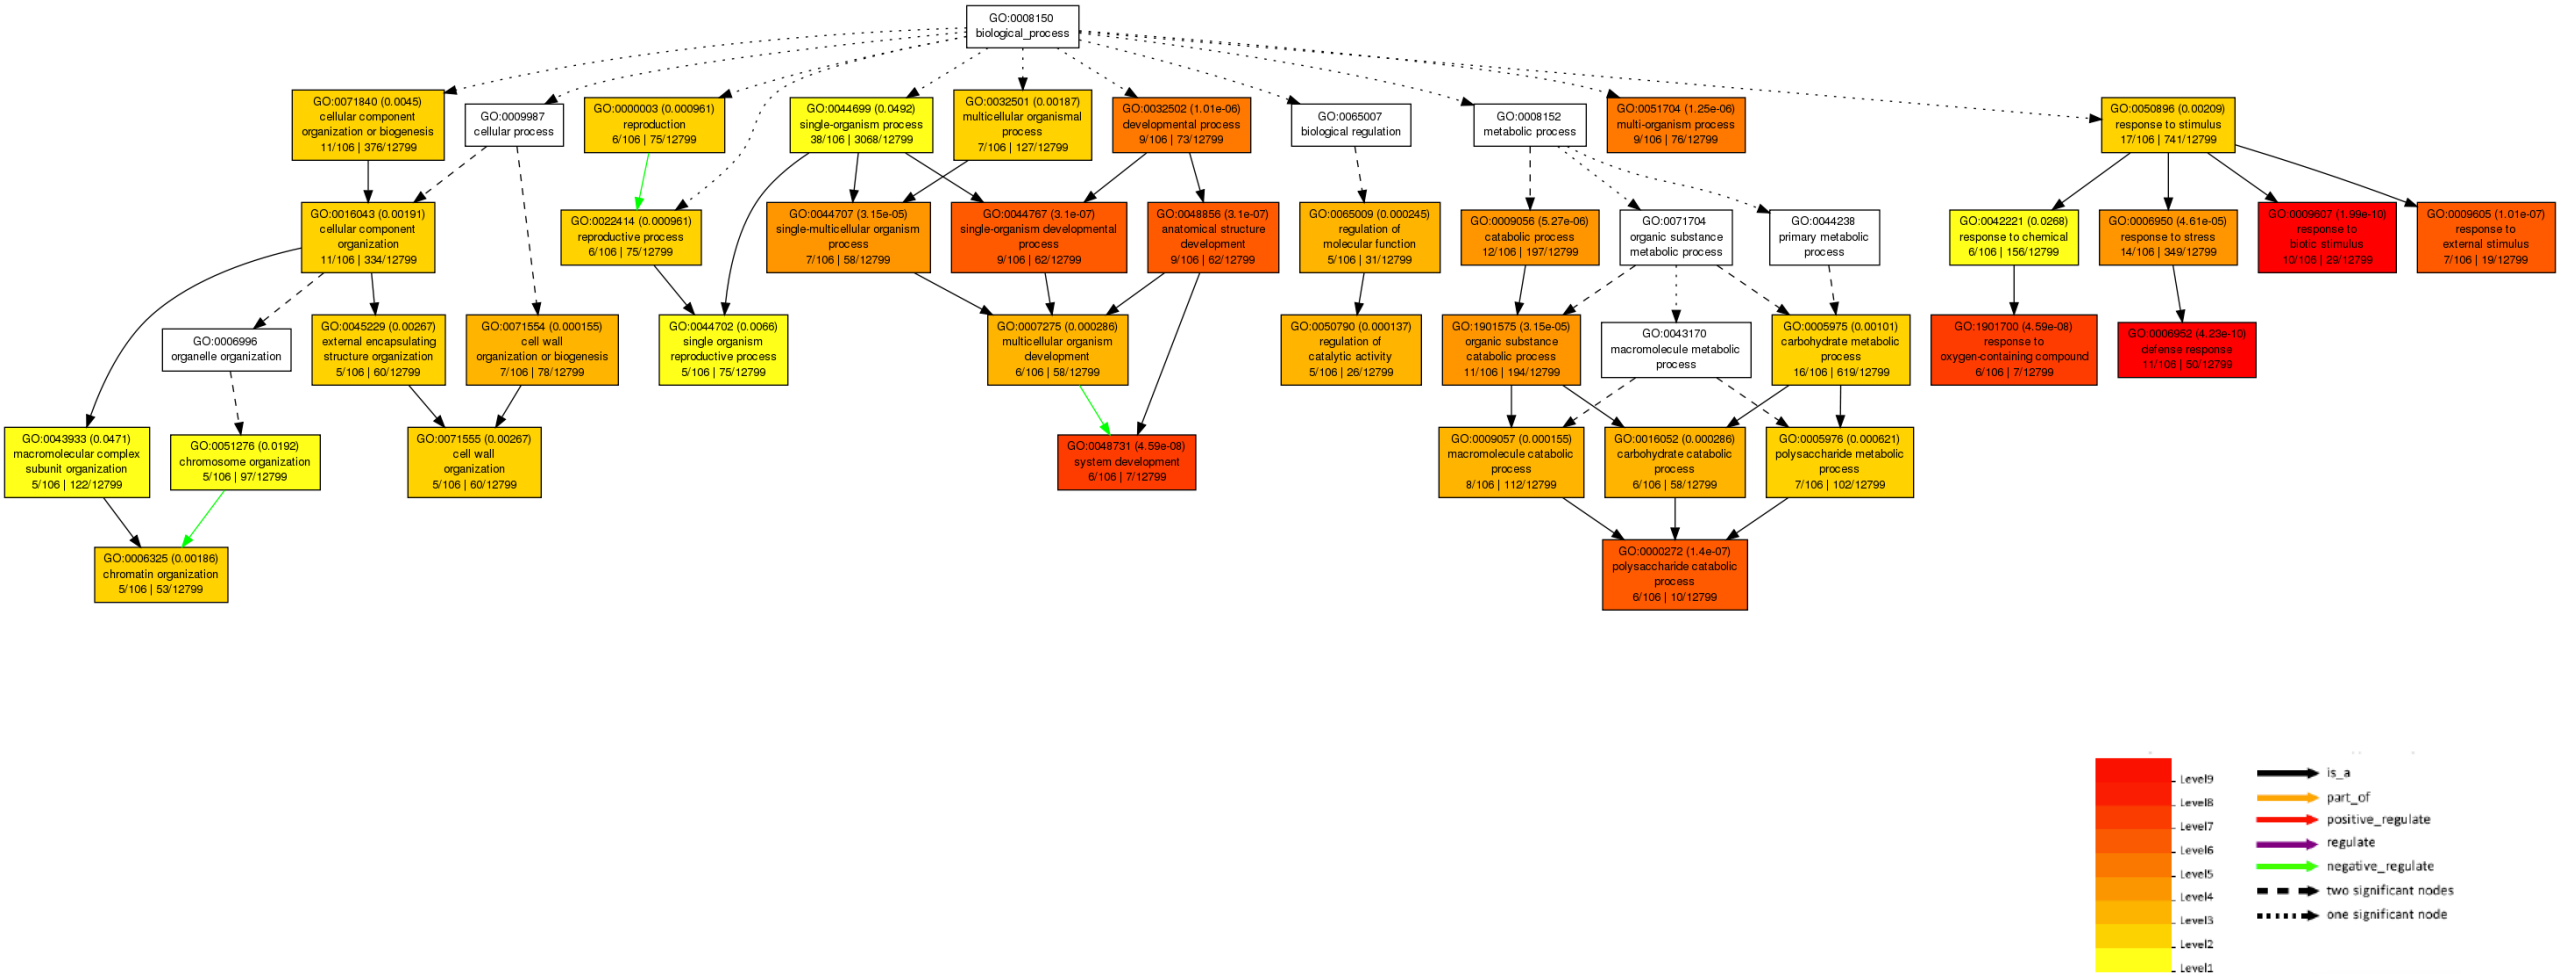

**Supplemental Figure S10. The network visualization of correlated GO terms under drought treatment.**
