# Supplementary material for: Global transcriptome and gene co-expression network analyses reveal regulatory and non-additive effects of drought and heat stress in grapevine
Source: PubMed Central journal article supplement (PMC9932518; doi:10.3389/fpls.2023.1096225), 2023-02-02
Supplement: Image_13.pdf [file Image_13.pdf]

CirGO Visualisation Plot

(A)

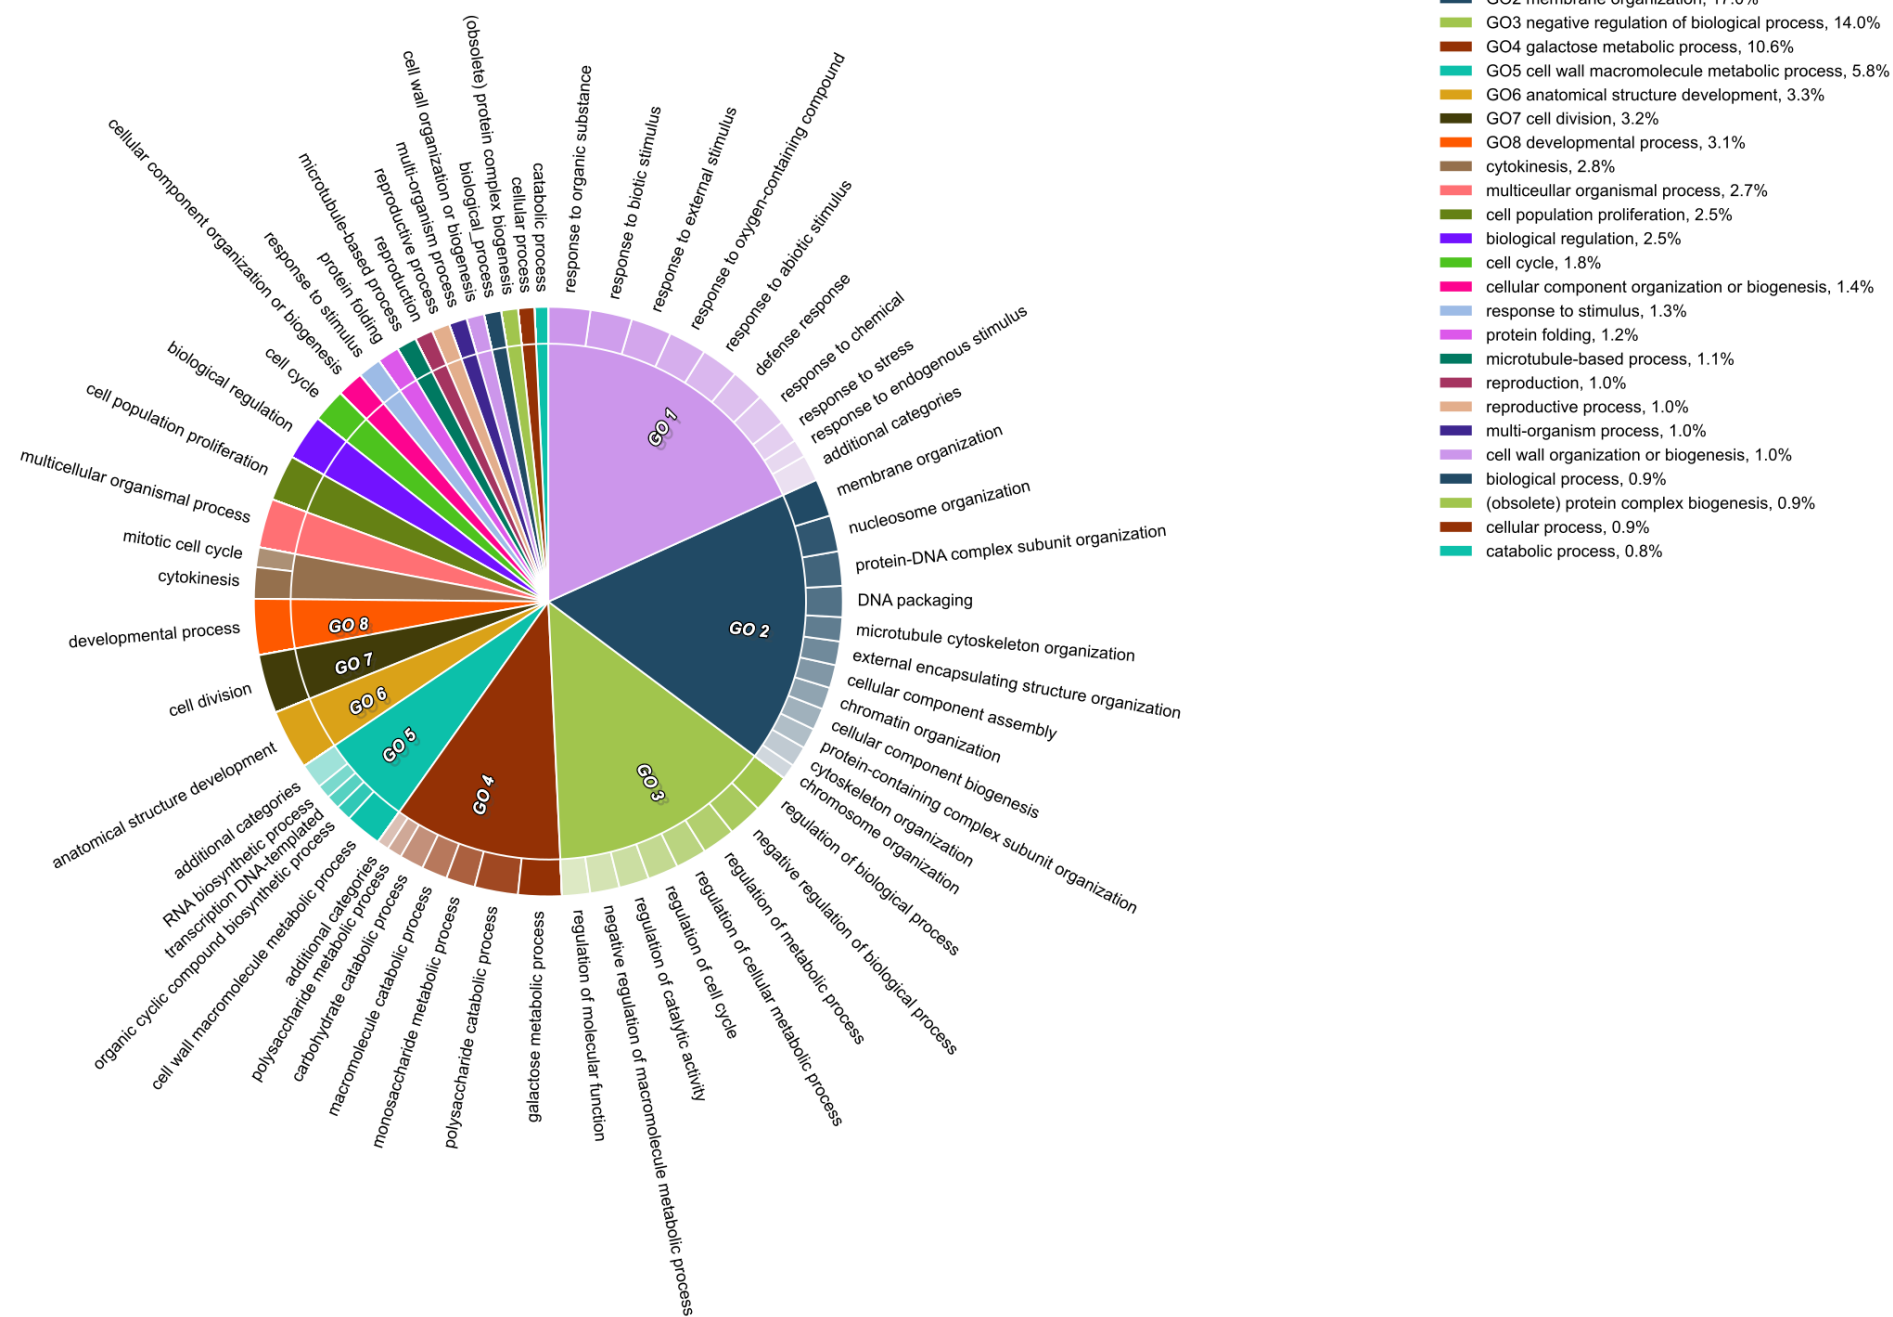

CirGO Visualisation Plot

(B)

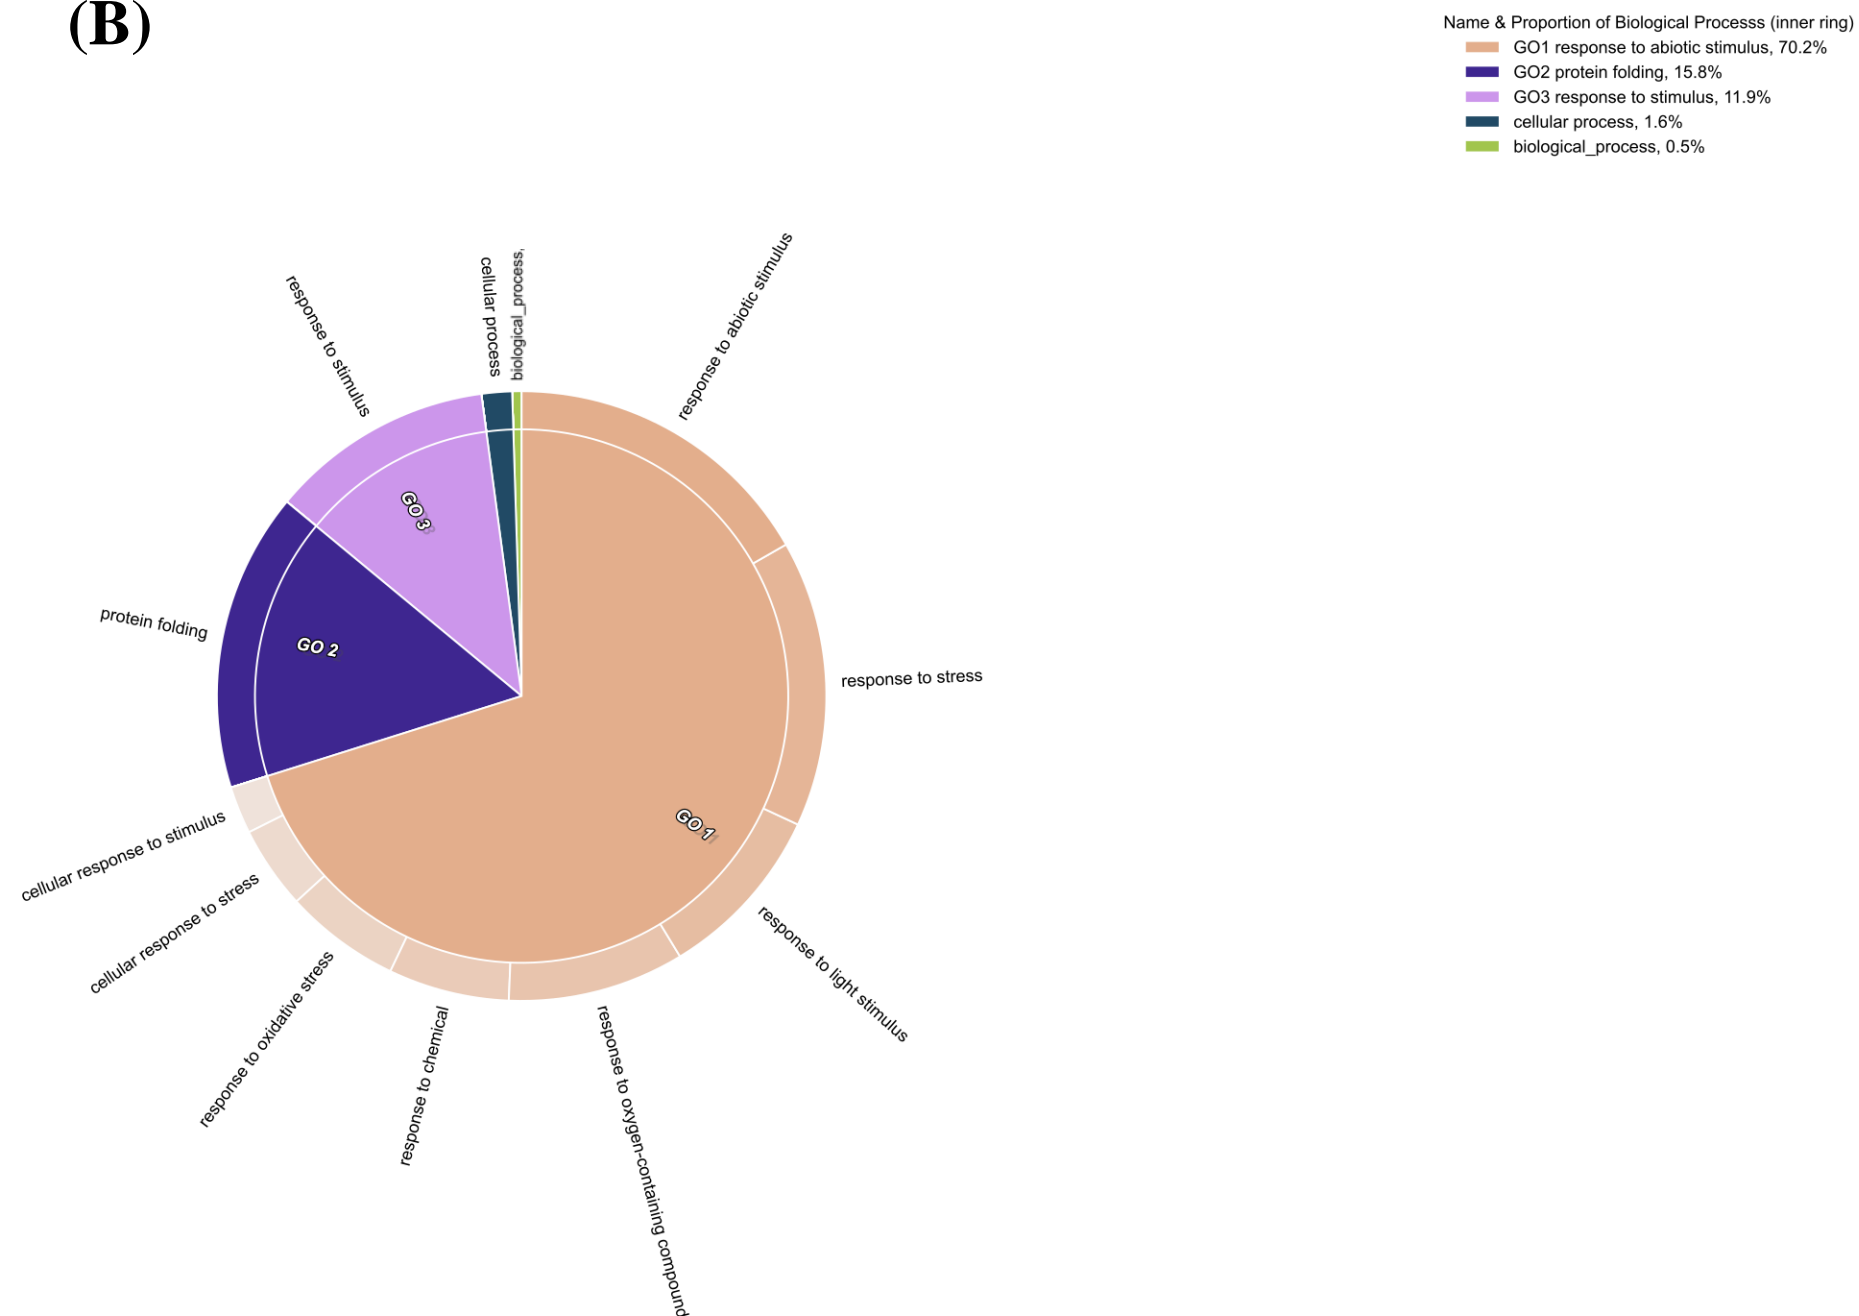

**Supplemental Figure S13.** (A) All DEGs enriched GO terms identified under drought stress. Each section is a single cluster representative. Different representatives are joined into a summarized section, visualized with different colors. Section size represents the P-value of GO terms in the Uniprot database, (B) DEGs enriched GO terms identified under heat stress.
