# Supplementary material for: Global transcriptome and gene co-expression network analyses reveal regulatory and non-additive effects of drought and heat stress in grapevine
Source: PubMed Central journal article supplement (PMC9932518; doi:10.3389/fpls.2023.1096225), 2023-02-02
Supplement: Image_15.pdf [file Image_15.pdf]

**(A)**

st3\_Heat

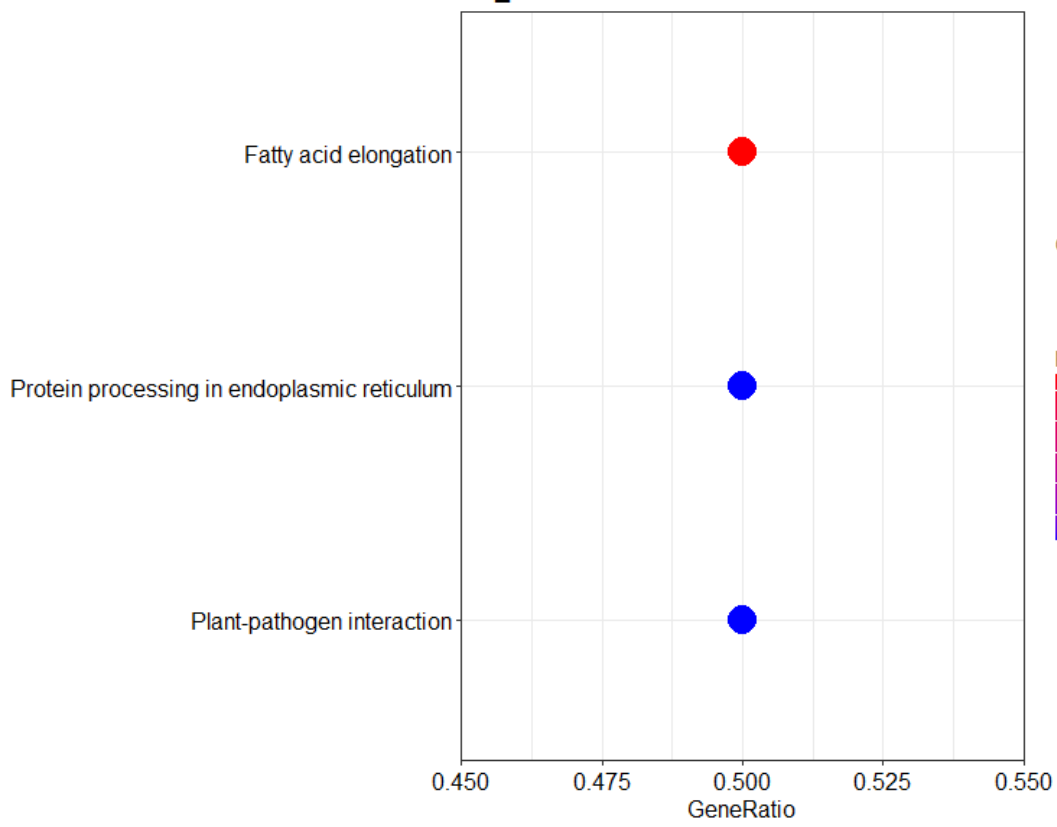**(B)**

st4\_Heat

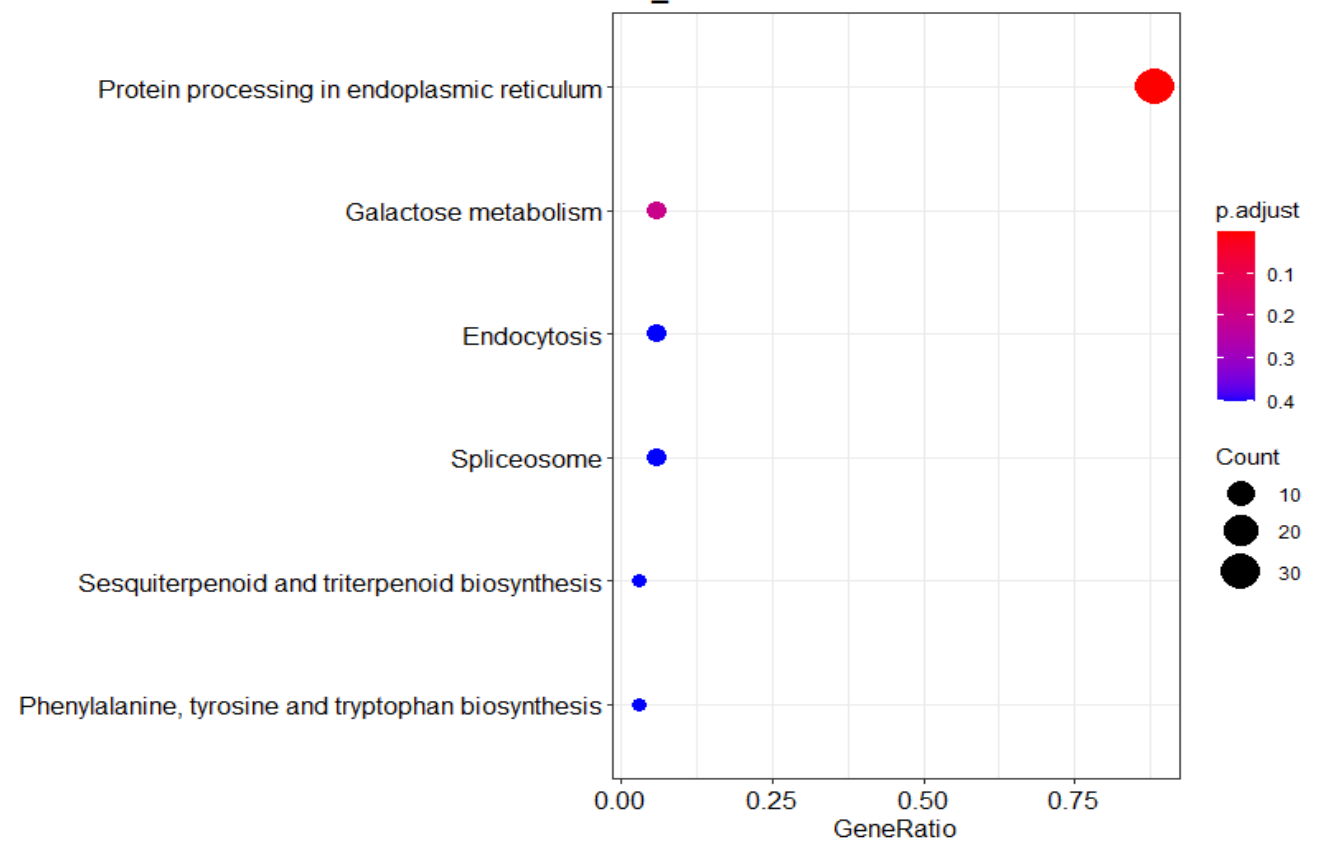**(C)**

st5\_Heat

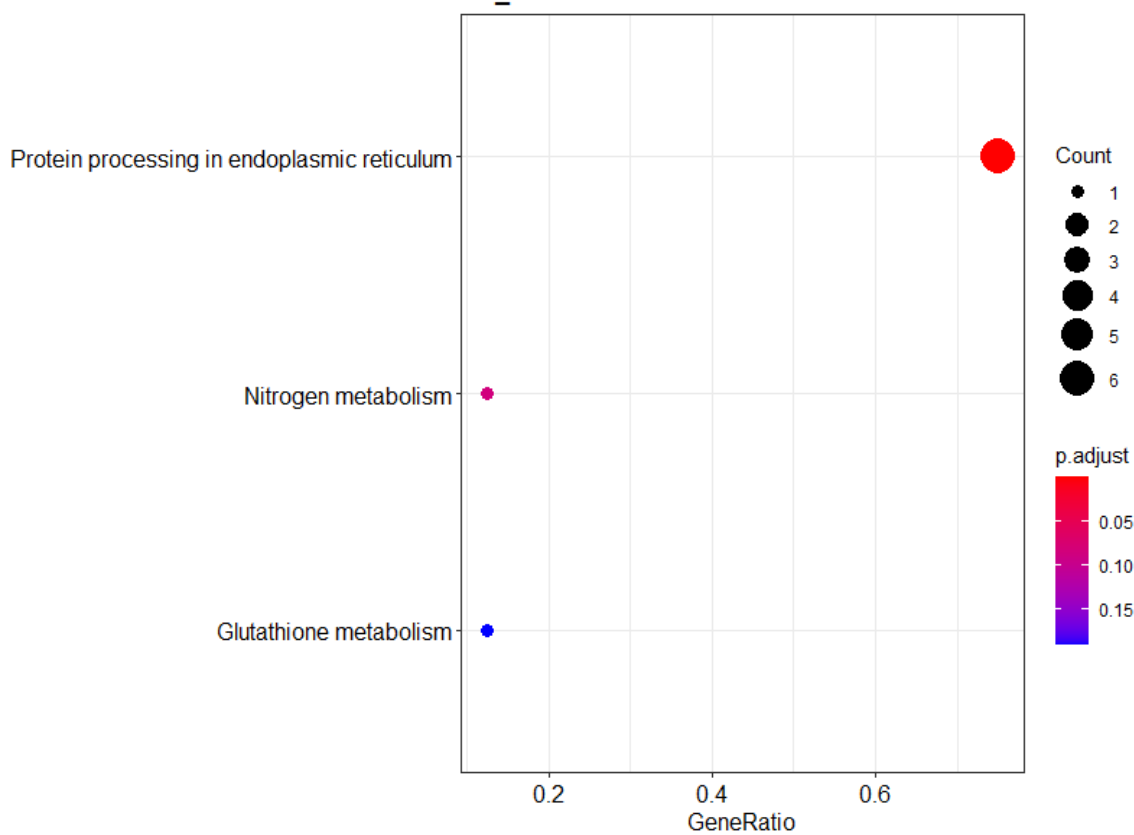**(D)**

st6\_Heat

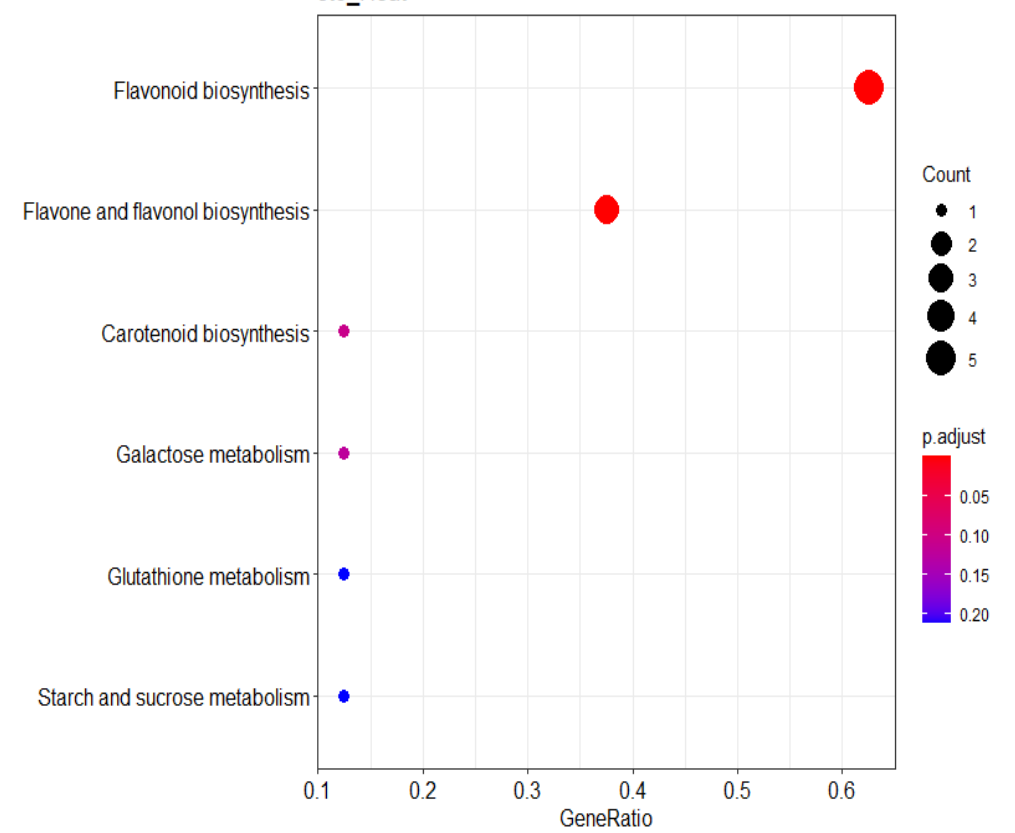

**Supplemental Figure S15. KEGG functional enrich analysis of differentially expressed genes under heat treatment at different sampling time points. (A) sampling time 3; (B) sampling time 4; (C) sampling time 5; (D) sampling time 6. Significantly enriched pathways are with adjusted p-value < 0.05.**
