# Supplementary material for: Global transcriptome and gene co-expression network analyses reveal regulatory and non-additive effects of drought and heat stress in grapevine
Source: PubMed Central journal article supplement (PMC9932518; doi:10.3389/fpls.2023.1096225), 2023-02-02
Supplement: Table_1.pdf [file Table_1.pdf]

| Supplemental Table S1: List of plants and their total sequence reads and the genome mapping percentage. |          |                      |                    |              |  |                                         |
|---------------------------------------------------------------------------------------------------------|----------|----------------------|--------------------|--------------|--|-----------------------------------------|
| Sampling time 1                                                                                         |          |                      |                    |              |  |                                         |
|                                                                                                         | Plant ID | Total Sequence reads | Genome Mapping (%) | Mapped reads |  | Low read count file & re-sequenced file |
| Control                                                                                                 | P3       | 22739862             | 81.06              | 18432932     |  | File after merging                      |
|                                                                                                         | P5       | 30354934             | 77.48              | 23519003     |  | File lower than <180,000 reads          |
|                                                                                                         | P7       | 40947690             | 75.19              | 30788568     |  |                                         |
|                                                                                                         | P8       | 28349881             | 79.44              | 22521145     |  |                                         |
|                                                                                                         | P10      | 19893992             | 81.66              | 16245434     |  |                                         |
| Sampling time 2                                                                                         |          |                      |                    |              |  |                                         |
|                                                                                                         | Plant ID | Total Sequence reads |                    |              |  |                                         |
| Control                                                                                                 | P11      | 28801524             | 82.44              | 23743976     |  |                                         |
|                                                                                                         | P15      | 39594161             | 85.96              | 34035141     |  |                                         |
|                                                                                                         | P19      | 19228389             | 85.26              | 16394124     |  |                                         |
|                                                                                                         | P23      | 28300628             | 82.9               | 23461221     |  |                                         |
|                                                                                                         | P25_HL   | 8107448              |                    |              |  |                                         |
|                                                                                                         | P25_HY   | 21991117             |                    |              |  |                                         |
| Drought                                                                                                 | P25      | 30098565             | 88.88              | 26751605     |  |                                         |
|                                                                                                         | P13      | 31698616             | 82.15              | 26040413     |  |                                         |
|                                                                                                         | P17      | 27293174             | 85.75              | 23403897     |  |                                         |
|                                                                                                         | P21      | 25737966             | 85.73              | 22065158     |  |                                         |
|                                                                                                         | P24      | 20371334             | 85.35              | 17386934     |  |                                         |
|                                                                                                         | P27_HL   | 5786117              |                    |              |  |                                         |
|                                                                                                         | P27_HY   | 22299216             |                    |              |  |                                         |
|                                                                                                         | P27      | 28085333             | 82.3               | 23114229     |  |                                         |
| Sampling Time 3                                                                                         |          |                      |                    |              |  |                                         |
|                                                                                                         | Plant ID | Total Sequence reads |                    |              |  |                                         |
| Control                                                                                                 | P28_HL   | 17142020             |                    |              |  |                                         |
|                                                                                                         | P28_HY   | 16481188             |                    |              |  |                                         |
|                                                                                                         | P28      | 33623208             | 85.16              | 28633524     |  |                                         |
|                                                                                                         | P33_HL   | 16028872             |                    |              |  |                                         |
|                                                                                                         | P33_HY   | 16697822             |                    |              |  |                                         |
|                                                                                                         | P33      | 32726694             | 84.19              | 27552604     |  |                                         |
|                                                                                                         | P39_HL   | 9787743              |                    |              |  |                                         |
|                                                                                                         | P39_HY   | 23943368             |                    |              |  |                                         |
|                                                                                                         | P39      | 33731111             | 87.02              | 29352813     |  |                                         |
|                                                                                                         | P44_HL   | 16359574             |                    |              |  |                                         |
|                                                                                                         | P44_HY   | 16801287             |                    |              |  |                                         |
|                                                                                                         | P44      | 33160861             | 84.07              | 27878336     |  |                                         |
|                                                                                                         | P49_HL   | 14421847             |                    |              |  |                                         |
|                                                                                                         | P49_HY   | 18814195             |                    |              |  |                                         |
| P49                                                                                                     | 33236042 | 85.63                | 28460023           |              |  |                                         |
| Heat                                                                                                    | P31_HL   | 14173922             |                    |              |  |                                         |
|                                                                                                         | P31_HY   | 18504203             |                    |              |  |                                         |
|                                                                                                         | P31      | 32678125             | 86.5               | 28266578     |  |                                         |
|                                                                                                         | P36_HL   | 16458606             |                    |              |  |                                         |
|                                                                                                         | P36_HY   | 15981006             |                    |              |  |                                         |
|                                                                                                         | P36      | 32439612             | 81.73              | 26512895     |  |                                         |
|                                                                                                         | P41      | 25755191             | 83.97              | 21626634     |  |                                         |
| Drought                                                                                                 | P47      | 15743374             | 84.02              | 13227583     |  |                                         |
|                                                                                                         | P52      | 25262221             | 79.43              | 20065782     |  |                                         |
|                                                                                                         | P29_HL   | 11545717             |                    |              |  |                                         |
|                                                                                                         | P29_HY   | 21724063             |                    |              |  |                                         |
|                                                                                                         | P29      | 33269780             | 82.96              | 27600609     |  |                                         |
|                                                                                                         | P35_HL   | 15882451             |                    |              |  |                                         |
|                                                                                                         | P35_HY   | 15966641             |                    |              |  |                                         |
|                                                                                                         | P35      | 31849092             | 82.4               | 26243652     |  |                                         |
| Combined                                                                                                | P40      | 27228112             | 88.48              | 24091433     |  |                                         |
|                                                                                                         | P45_HL   | 11244993             |                    |              |  |                                         |
|                                                                                                         | P45_HY   | 19395683             |                    |              |  |                                         |
|                                                                                                         | P45      | 30640676             | 82.51              | 25281622     |  |                                         |
|                                                                                                         | P51      | 29846358             | 83.8               | 25011248     |  |                                         |
|                                                                                                         | P32_HL   | 14429814             |                    |              |  |                                         |
|                                                                                                         | P32_HY   | 13730977             |                    |              |  |                                         |
| P32                                                                                                     | 28160791 | 83.57                | 23533973           |              |  |                                         |

|                 |          |                      |       |          |  |
|-----------------|----------|----------------------|-------|----------|--|
|                 | P37_HL   | 15968269             |       |          |  |
|                 | P37_HY   | 14654834             |       |          |  |
|                 | P37      | 30623103             | 86.33 | 26436925 |  |
|                 | P43_HL   | 9630467              |       |          |  |
|                 | P43_HY   | 22534686             |       |          |  |
|                 | P43      | 32165153             | 84.3  | 27115224 |  |
|                 | P48      | 19332598             | 80.65 | 15591740 |  |
|                 | P53      | 31444566             | 81.97 | 25775111 |  |
| Sampling Time 4 |          |                      |       |          |  |
|                 | Plant ID | Total Sequence reads |       |          |  |
| Control         | P81_HL   | 5702336              |       |          |  |
|                 | P81_HY   | 21811041             |       |          |  |
|                 | P81      | 27513377             | 85.17 | 23433143 |  |
|                 | P87_HL   | 5600715              |       |          |  |
|                 | P87_HY   | 22491182             |       |          |  |
|                 | P87      | 28091897             | 80.78 | 22692634 |  |
|                 | P97      | 32500186             | 87.21 | 28343412 |  |
|                 | P103     | 41370487             | 86.39 | 35739964 |  |
| Drought         | P83_HL   | 10444456             |       |          |  |
|                 | P83_HY   | 16621266             |       |          |  |
|                 | P83      | 27065722             | 82.64 | 22367113 |  |
|                 | P88_HL   | 5601484              |       |          |  |
|                 | P88_HY   | 21989018             |       |          |  |
|                 | P88      | 27590502             | 81.9  | 22596621 |  |
|                 | P93      | 35595082             | 83.56 | 29743251 |  |
|                 | P99      | 36596421             | 86.62 | 31699820 |  |
|                 | P104     | 40369746             | 87.59 | 35359861 |  |
| Heat            | P84_HL   | 9271461              |       |          |  |
|                 | P84_HY   | 19083676             |       |          |  |
|                 | P84      | 28355137             | 77.11 | 21864646 |  |
|                 | P89      | 24294055             | 81.96 | 19911407 |  |
|                 | P95      | 24189240             | 82.9  | 20052880 |  |
|                 | P100     | 42755435             | 90.25 | 38586780 |  |
|                 | P105     | 22077984             | 86.66 | 19132781 |  |
| Combined        | P85_HL   | 6085735              |       |          |  |
|                 | P85_HY   | 23544524             |       |          |  |
|                 | P85      | 29630259             | 77.41 | 22936783 |  |
|                 | P91_HL   | 5611191              |       |          |  |
|                 | P91_HY   | 21938562             |       |          |  |
|                 | P91      | 27549753             | 78.92 | 21742265 |  |
|                 | P96      | 29396380             | 86.62 | 25463144 |  |
|                 | P101     | 40208647             | 86.58 | 34812647 |  |
|                 | P107     | 20177159             | 82.97 | 16740989 |  |
| Sampling Time 5 |          |                      |       |          |  |
|                 | Plant ID | Total Sequence reads |       |          |  |
| Control         | 108      | 29103902             | 85.11 | 24770331 |  |
|                 | 113      | 24972685             | 87.48 | 21846105 |  |
|                 | 119      | 77094314             | 90.82 | 70017056 |  |
|                 | 124      | 26717730             | 85.18 | 22758162 |  |
|                 | 129      | 18774965             | 89.57 | 16816736 |  |
| Drought         | 109      | 19736531             | 85.56 | 16886576 |  |
|                 | 115      | 29832008             | 82.63 | 24650188 |  |
|                 | 120      | 21175882             | 88.2  | 18677128 |  |
|                 | 125      | 22643401             | 84.91 | 19226512 |  |
|                 | 131      | 14732309             | 86.85 | 12795010 |  |
| Heat            | 111      | 20639045             | 84.97 | 17536997 |  |
|                 | 116      | 22569484             | 83.89 | 18933540 |  |
|                 | 121      | 26118600             | 88    | 22984368 |  |
|                 | 127      | 46155971             | 77.3  | 35678566 |  |
|                 | 132      | 21259468             | 83.47 | 17745278 |  |
| Combined        | 112      | 24349313             | 86.24 | 20998848 |  |
|                 | 117      | 29211747             | 85.48 | 24970201 |  |
|                 | 123      | 24817235             | 85    | 21094650 |  |
|                 | 128      | 24588128             | 90.62 | 22281762 |  |

|                 |          |                      |       |          |  |  |
|-----------------|----------|----------------------|-------|----------|--|--|
|                 | 133      | 24065380             | 86.58 | 20835806 |  |  |
| Sampling Time 6 |          |                      |       |          |  |  |
|                 | Plant ID | Total Sequence reads |       |          |  |  |
| Control         | 135      | 18094868             | 85.46 | 15463874 |  |  |
|                 | 140      | 19099154             | 84.35 | 16110136 |  |  |
|                 | 145      | 19968733             | 89.26 | 17824091 |  |  |
|                 | 151      | 16769821             | 87.57 | 14685332 |  |  |
|                 | 156      | 27670747             | 89.27 | 24701676 |  |  |
| Drought         | 136      | 16613043             | 85.78 | 14250668 |  |  |
|                 | 141      | 18903514             | 85.86 | 16230557 |  |  |
|                 | 147      | 26660934             | 87.25 | 23261665 |  |  |
|                 | 152      | 27867886             | 86.75 | 24175391 |  |  |
|                 | 157      | 37426169             | 90.55 | 33889396 |  |  |
| Heat            | 137      | 18398421             | 84.82 | 15605541 |  |  |
|                 | 143      | 21784403             | 85.86 | 18704088 |  |  |
|                 | 148      | 24062040             | 87.13 | 20965255 |  |  |
|                 | 153      | 39681369             | 84.75 | 33629960 |  |  |
|                 | 159_HL   | 5953689              |       |          |  |  |
|                 | 159_HY   | 20493388             |       |          |  |  |
|                 | P159     | 26447077             | 80.53 | 21297831 |  |  |
| Combined        | 139      | 13437655             | 87.59 | 11770042 |  |  |
|                 | 144      | 25251459             | 88    | 22221284 |  |  |
|                 | 149      | 22832739             | 86.05 | 19647572 |  |  |
|                 | 155      | 29540237             | 81.06 | 23945316 |  |  |
|                 | 160      | 25965905             | 84.95 | 22058036 |  |  |
|                 |          |                      |       |          |  |  |
|                 |          |                      |       |          |  |  |
