# Supplementary material for: Global transcriptome and gene co-expression network analyses reveal regulatory and non-additive effects of drought and heat stress in grapevine
Source: PubMed Central journal article supplement (PMC9932518; doi:10.3389/fpls.2023.1096225), 2023-02-02
Supplement: Table_3.pdf [file Table_3.pdf]

**Supplemental Table S3. List of grapevine genes present in different clusters (LT, SC and SWP) identified through clust.**

| LT_Positive       | LT_Negative     | SC_Positive       | SC_Negative       | SWP_Positive    | SWP_Negative      |
|-------------------|-----------------|-------------------|-------------------|-----------------|-------------------|
| ENSRNA049453911   | ENSRNA049454455 | ENSRNA049995941   | ENSRNA049462811   | ENSRNA049446246 | ENSRNA049443807   |
| ENSRNA049454258   | ENSRNA049456639 | VIT_00s0204g00080 | ENSRNA049463193   | ENSRNA049446424 | ENSRNA049446902   |
| ENSRNA049462537   | ENSRNA049463746 | VIT_00s0288g00070 | ENSRNA049467897   | ENSRNA049446567 | ENSRNA049452433   |
| ENSRNA049462592   | ENSRNA049463975 | VIT_00s0409g00010 | ENSRNA049468719   | ENSRNA049446710 | ENSRNA049457094   |
| ENSRNA049462606   | ENSRNA049464036 | VIT_00s0463g00030 | ENSRNA049470219   | ENSRNA049448236 | ENSRNA049462592   |
| ENSRNA049464608   | ENSRNA049464047 | VIT_00s0783g00010 | ENSRNA049996198   | ENSRNA049452668 | ENSRNA049462606   |
| ENSRNA049464983   | ENSRNA049464074 | VIT_01s0026g02530 | VIT_00s0120g00290 | ENSRNA049452771 | ENSRNA049462647   |
| ENSRNA049465017   | ENSRNA049464333 | VIT_01s0137g00240 | VIT_00s0144g00170 | ENSRNA049454258 | ENSRNA049462688   |
| ENSRNA049465046   | ENSRNA049464352 | VIT_01s0137g00770 | VIT_00s0144g00300 | ENSRNA049454455 | ENSRNA049462840   |
| ENSRNA049465066   | ENSRNA049464363 | VIT_02s0025g03760 | VIT_00s0160g00030 | ENSRNA049455021 | ENSRNA049463315   |
| ENSRNA049465080   | ENSRNA049464378 | VIT_02s0025g04120 | VIT_00s0174g00230 | ENSRNA049455245 | ENSRNA049464608   |
| ENSRNA049465114   | ENSRNA049464405 | VIT_02s0154g00250 | VIT_00s0181g00240 | ENSRNA049455268 | ENSRNA049464889   |
| ENSRNA049465155   | ENSRNA049464426 | VIT_03s0038g04510 | VIT_00s0188g00050 | ENSRNA049455429 | ENSRNA049465017   |
| ENSRNA049467161   | ENSRNA049464433 | VIT_04s0008g03270 | VIT_00s0194g00310 | ENSRNA049455696 | ENSRNA049465046   |
| ENSRNA049467496   | ENSRNA049464462 | VIT_04s0008g05500 | VIT_00s0199g00080 | ENSRNA049455859 | ENSRNA049465066   |
| ENSRNA049467875   | ENSRNA049464484 | VIT_05s0062g00960 | VIT_00s0220g00110 | ENSRNA049456066 | ENSRNA049465080   |
| ENSRNA049468647   | ENSRNA049464504 | VIT_07s0129g00790 | VIT_00s0225g00030 | ENSRNA049456240 | ENSRNA049465114   |
| ENSRNA049469046   | ENSRNA049464542 | VIT_07s0130g00470 | VIT_00s0260g00030 | ENSRNA049456270 | ENSRNA049465155   |
| ENSRNA049469052   | ENSRNA049464560 | VIT_08s0007g00010 | VIT_00s0260g00050 | ENSRNA049456507 | ENSRNA049466223   |
| ENSRNA049469640   | ENSRNA049464903 | VIT_08s0007g03920 | VIT_00s0264g00120 | ENSRNA049456616 | ENSRNA049466764   |
| ENSRNA049469831   | ENSRNA049464951 | VIT_08s0032g00560 | VIT_00s0269g00040 | ENSRNA049456639 | ENSRNA049466856   |
| ENSRNA049469867   | ENSRNA049465128 | VIT_09s0002g02440 | VIT_00s0332g00100 | ENSRNA049456776 | ENSRNA049466933   |
| ENSRNA049470361   | ENSRNA049465174 | VIT_11s0016g02450 | VIT_00s0349g00040 | ENSRNA049456796 | ENSRNA049467127   |
| ENSRNA049995760   | ENSRNA049465189 | VIT_11s0206g00090 | VIT_00s0391g00060 | ENSRNA049458073 | ENSRNA049467196   |
| ENSRNA049996164   | ENSRNA049465343 | VIT_12s0035g00200 | VIT_00s0408g00040 | ENSRNA049458803 | ENSRNA049467740   |
| ENSRNA049996305   | ENSRNA049465739 | VIT_12s0059g00850 | VIT_00s0409g00070 | ENSRNA049463193 | ENSRNA049467756   |
| ENSRNA049996403   | ENSRNA049465757 | VIT_13s0019g04030 | VIT_00s0499g00010 | ENSRNA049463746 | ENSRNA049468634   |
| ENSRNA049996504   | ENSRNA049465862 | VIT_14s0030g00160 | VIT_00s1261g00030 | ENSRNA049463914 | ENSRNA049469019   |
| ENSRNA049996673   | ENSRNA049465924 | VIT_14s0036g00100 | VIT_00s1466g00020 | ENSRNA049467118 | ENSRNA049469046   |
| ENSRNA049996836   | ENSRNA049465966 | VIT_14s0066g01820 | VIT_00s1542g00020 | ENSRNA049467573 | ENSRNA049469052   |
| ENSRNA049996908   | ENSRNA049465976 | VIT_14s0108g00670 | VIT_00s1818g00010 | ENSRNA049467790 | ENSRNA049469509   |
| VIT_00s0120g00270 | ENSRNA049465998 | VIT_15s0048g02910 | VIT_00s2472g00010 | ENSRNA049468213 | ENSRNA049469692   |
| VIT_00s0144g00010 | ENSRNA049466094 | VIT_17s0119g00030 | VIT_00s2761g00010 | ENSRNA049468587 | ENSRNA049469831   |
| VIT_00s0169g00080 | ENSRNA049467039 | VIT_18s0001g04240 | VIT_00s2837g00010 | ENSRNA049468692 | ENSRNA049469952   |
| VIT_00s0173g00110 | ENSRNA049467050 | VIT_18s0001g07740 | VIT_01s0010g01460 | ENSRNA049468799 | ENSRNA049995958   |
| VIT_00s0173g00130 | ENSRNA049467073 | VIT_19s0014g00340 | VIT_01s0010g01730 | ENSRNA049468828 | ENSRNA049996313   |
| VIT_00s0173g00140 | ENSRNA049467917 |                   | VIT_01s0010g03370 | ENSRNA049469370 | ENSRNA049996335   |
| VIT_00s0173g00150 | ENSRNA049467932 |                   | VIT_01s0010g03670 | ENSRNA049469468 | ENSRNA049996403   |
| VIT_00s0173g00220 | ENSRNA049467945 |                   | VIT_01s0011g00210 | ENSRNA049469516 | ENSRNA049996418   |
| VIT_00s0173g00240 | ENSRNA049468461 |                   | VIT_01s0011g00570 | ENSRNA049470121 | ENSRNA049996504   |
| VIT_00s0173g00250 | ENSRNA049468542 |                   | VIT_01s0011g00790 | ENSRNA049470237 | ENSRNA049996524   |
| VIT_00s0173g00260 | ENSRNA049468558 |                   | VIT_01s0011g01810 | ENSRNA049470318 | ENSRNA049996673   |
| VIT_00s0174g00120 | ENSRNA049468611 |                   | VIT_01s0011g04420 | ENSRNA049995773 | ENSRNA049996709   |
| VIT_00s0174g00240 | ENSRNA049468619 |                   | VIT_01s0011g04510 | ENSRNA049995785 | ENSRNA049996944   |
| VIT_00s0174g00250 | ENSRNA049468741 |                   | VIT_01s0011g04530 | ENSRNA049995812 | VIT_00s0120g00010 |
| VIT_00s0174g00260 | ENSRNA049468772 |                   | VIT_01s0011g04800 | ENSRNA049995824 | VIT_00s0120g00270 |
| VIT_00s0174g00300 | ENSRNA049468789 |                   | VIT_01s0026g00050 | ENSRNA049995831 | VIT_00s0125g00090 |
| VIT_00s0174g00320 | ENSRNA049468799 |                   | VIT_01s0026g01070 | ENSRNA049995868 | VIT_00s0144g00010 |
| VIT_00s0179g00190 | ENSRNA049468811 |                   | VIT_01s0026g01540 | ENSRNA049995949 | VIT_00s0144g00250 |
| VIT_00s0179g00250 | ENSRNA049469178 |                   | VIT_01s0026g02290 | ENSRNA049996182 | VIT_00s0144g00290 |
| VIT_00s0179g00260 | ENSRNA049469526 |                   | VIT_01s0026g02770 | ENSRNA049996190 | VIT_00s0153g00060 |
| VIT_00s0181g00120 | ENSRNA049469532 |                   | VIT_01s0113g00300 | ENSRNA049996213 | VIT_00s0160g00020 |
| VIT_00s0181g00160 | ENSRNA049469602 |                   | VIT_01s0113g00400 | ENSRNA049996717 | VIT_00s0160g00150 |
| VIT_00s0181g00170 | ENSRNA049469645 |                   | VIT_01s0113g00460 | ENSRNA049996817 | VIT_00s0169g00040 |
| VIT_00s0181g00260 | ENSRNA049469658 |                   | VIT_01s0113g00510 | ENSRNA049996872 | VIT_00s0169g00050 |

|                   |                   |                   |                   |                   |
|-------------------|-------------------|-------------------|-------------------|-------------------|
| VIT_00s0183g00050 | ENSRNA049469665   | VIT_01s0150g00290 | ENSRNA049996932   | VIT_00s0169g00060 |
| VIT_00s0183g00060 | ENSRNA049469675   | VIT_02s0025g01930 | VIT_00s0120g00030 | VIT_00s0169g00070 |
| VIT_00s0187g00040 | ENSRNA049469681   | VIT_02s0025g02200 | VIT_00s0120g00070 | VIT_00s0169g00080 |
| VIT_00s0187g00250 | ENSRNA049469697   | VIT_02s0025g03090 | VIT_00s0120g00080 | VIT_00s0173g00060 |
| VIT_00s0187g00260 | ENSRNA049469705   | VIT_02s0025g03440 | VIT_00s0120g00280 | VIT_00s0173g00130 |
| VIT_00s0187g00290 | ENSRNA049469743   | VIT_02s0025g04400 | VIT_00s0125g00140 | VIT_00s0173g00140 |
| VIT_00s0187g00330 | ENSRNA049470325   | VIT_02s0025g04440 | VIT_00s0125g00180 | VIT_00s0173g00150 |
| VIT_00s0188g00200 | ENSRNA049995915   | VIT_02s0025g04850 | VIT_00s0125g00210 | VIT_00s0173g00220 |
| VIT_00s0189g00010 | ENSRNA049996897   | VIT_02s0033g00090 | VIT_00s0125g00330 | VIT_00s0173g00240 |
| VIT_00s0189g00050 | ENSRNA049996920   | VIT_02s0087g00160 | VIT_00s0125g00410 | VIT_00s0173g00250 |
| VIT_00s0192g00130 | VIT_00s0120g00070 | VIT_02s0109g00420 | VIT_00s0131g00060 | VIT_00s0173g00260 |
| VIT_00s0193g00030 | VIT_00s0125g00070 | VIT_03s0017g01130 | VIT_00s0131g00270 | VIT_00s0174g00160 |
| VIT_00s0194g00020 | VIT_00s0125g00140 | VIT_03s0038g00870 | VIT_00s0131g00320 | VIT_00s0174g00250 |
| VIT_00s0194g00040 | VIT_00s0125g00170 | VIT_03s0038g01250 | VIT_00s0131g00360 | VIT_00s0174g00300 |
| VIT_00s0194g00060 | VIT_00s0125g00270 | VIT_03s0038g01280 | VIT_00s0144g00040 | VIT_00s0174g00320 |
| VIT_00s0194g00140 | VIT_00s0125g00300 | VIT_03s0038g01360 | VIT_00s0144g00120 | VIT_00s0179g00080 |
| VIT_00s0194g00160 | VIT_00s0125g00320 | VIT_03s0038g01600 | VIT_00s0144g00190 | VIT_00s0179g00180 |
| VIT_00s0194g00190 | VIT_00s0125g00330 | VIT_03s0038g01820 | VIT_00s0144g00220 | VIT_00s0179g00190 |
| VIT_00s0194g00200 | VIT_00s0125g00380 | VIT_03s0038g01950 | VIT_00s0144g00270 | VIT_00s0179g00250 |
| VIT_00s0194g00270 | VIT_00s0125g00390 | VIT_03s0063g00330 | VIT_00s0153g00070 | VIT_00s0181g00030 |
| VIT_00s0198g00010 | VIT_00s0125g00420 | VIT_03s0063g01060 | VIT_00s0160g00110 | VIT_00s0181g00040 |
| VIT_00s0198g00030 | VIT_00s0131g00250 | VIT_03s0063g02010 | VIT_00s0160g00280 | VIT_00s0181g00120 |
| VIT_00s0198g00040 | VIT_00s0131g00360 | VIT_03s0063g02080 | VIT_00s0160g00310 | VIT_00s0181g00150 |
| VIT_00s0198g00090 | VIT_00s0144g00080 | VIT_03s0063g02140 | VIT_00s0160g00320 | VIT_00s0181g00160 |
| VIT_00s0198g00120 | VIT_00s0144g00300 | VIT_03s0063g02280 | VIT_00s0169g00110 | VIT_00s0181g00170 |
| VIT_00s0199g00100 | VIT_00s0173g00040 | VIT_03s0088g00370 | VIT_00s0174g00230 | VIT_00s0181g00190 |
| VIT_00s0199g00300 | VIT_00s0174g00280 | VIT_03s0091g00760 | VIT_00s0179g00040 | VIT_00s0181g00210 |
| VIT_00s0199g00310 | VIT_00s0174g00290 | VIT_03s0097g00530 | VIT_00s0179g00070 | VIT_00s0181g00260 |
| VIT_00s0201g00060 | VIT_00s0179g00210 | VIT_03s0132g00140 | VIT_00s0179g00300 | VIT_00s0183g00030 |
| VIT_00s0202g00060 | VIT_00s0184g00040 | VIT_03s0180g00100 | VIT_00s0179g00320 | VIT_00s0183g00050 |
| VIT_00s0203g00080 | VIT_00s0187g00370 | VIT_04s0008g00550 | VIT_00s0181g00010 | VIT_00s0183g00060 |
| VIT_00s0203g00110 | VIT_00s0189g00100 | VIT_04s0008g00790 | VIT_00s0181g00110 | VIT_00s0184g00030 |
| VIT_00s0203g00120 | VIT_00s0194g00110 | VIT_04s0008g01750 | VIT_00s0183g00040 | VIT_00s0184g00200 |
| VIT_00s0203g00210 | VIT_00s0194g00320 | VIT_04s0008g02930 | VIT_00s0183g00070 | VIT_00s0187g00040 |
| VIT_00s0204g00010 | VIT_00s0201g00080 | VIT_04s0008g02990 | VIT_00s0183g00100 | VIT_00s0188g00030 |
| VIT_00s0204g00020 | VIT_00s0202g00030 | VIT_04s0008g03120 | VIT_00s0183g00140 | VIT_00s0188g00110 |
| VIT_00s0207g00020 | VIT_00s0203g00190 | VIT_04s0008g03200 | VIT_00s0183g00150 | VIT_00s0188g00230 |
| VIT_00s0207g00060 | VIT_00s0203g00200 | VIT_04s0008g04340 | VIT_00s0183g00160 | VIT_00s0189g00050 |
| VIT_00s0207g00190 | VIT_00s0204g00040 | VIT_04s0008g04730 | VIT_00s0183g00180 | VIT_00s0189g00080 |
| VIT_00s0207g00200 | VIT_00s0207g00090 | VIT_04s0008g05030 | VIT_00s0183g00200 | VIT_00s0192g00020 |
| VIT_00s0207g00260 | VIT_00s0211g00030 | VIT_04s0008g05050 | VIT_00s0183g00210 | VIT_00s0192g00060 |
| VIT_00s0208g00060 | VIT_00s0211g00060 | VIT_04s0008g05320 | VIT_00s0183g00220 | VIT_00s0192g00090 |
| VIT_00s0208g00100 | VIT_00s0211g00070 | VIT_04s0008g06160 | VIT_00s0184g00010 | VIT_00s0192g00130 |
| VIT_00s0208g00110 | VIT_00s0211g00080 | VIT_04s0008g06680 | VIT_00s0184g00040 | VIT_00s0193g00030 |
| VIT_00s0213g00070 | VIT_00s0211g00090 | VIT_04s0008g07360 | VIT_00s0186g00110 | VIT_00s0193g00140 |
| VIT_00s0214g00040 | VIT_00s0211g00100 | VIT_04s0023g01590 | VIT_00s0187g00030 | VIT_00s0194g00020 |
| VIT_00s0214g00090 | VIT_00s0211g00120 | VIT_04s0023g01830 | VIT_00s0187g00150 | VIT_00s0194g00040 |
| VIT_00s0214g00160 | VIT_00s0211g00180 | VIT_04s0023g01900 | VIT_00s0187g00190 | VIT_00s0194g00050 |
| VIT_00s0216g00030 | VIT_00s0215g00090 | VIT_04s0023g02010 | VIT_00s0187g00210 | VIT_00s0194g00060 |
| VIT_00s0218g00070 | VIT_00s0220g00160 | VIT_04s0023g02800 | VIT_00s0187g00240 | VIT_00s0194g00140 |
| VIT_00s0218g00110 | VIT_00s0225g00040 | VIT_04s0043g00460 | VIT_00s0187g00300 | VIT_00s0194g00160 |
| VIT_00s0218g00120 | VIT_00s0225g00180 | VIT_04s0044g00270 | VIT_00s0187g00340 | VIT_00s0194g00200 |
| VIT_00s0225g00010 | VIT_00s0226g00100 | VIT_04s0044g00940 | VIT_00s0187g00370 | VIT_00s0194g00260 |
| VIT_00s0225g00100 | VIT_00s0227g00140 | VIT_04s0044g00980 | VIT_00s0188g00140 | VIT_00s0194g00360 |
| VIT_00s0225g00110 | VIT_00s0227g00150 | VIT_04s0069g00210 | VIT_00s0193g00050 | VIT_00s0198g00010 |
| VIT_00s0226g00020 | VIT_00s0229g00030 | VIT_04s0069g00270 | VIT_00s0194g00080 | VIT_00s0198g00020 |
| VIT_00s0227g00160 | VIT_00s0229g00040 | VIT_04s0069g00950 | VIT_00s0194g00170 | VIT_00s0198g00030 |

|                   |                   |                   |                   |                   |
|-------------------|-------------------|-------------------|-------------------|-------------------|
| VIT_00s0227g00170 | VIT_00s0229g00130 | VIT_05s0020g00430 | VIT_00s0194g00290 | VIT_00s0198g00040 |
| VIT_00s0230g00010 | VIT_00s0229g00160 | VIT_05s0020g01260 | VIT_00s0194g00320 | VIT_00s0198g00050 |
| VIT_00s0233g00090 | VIT_00s0229g00180 | VIT_05s0020g02440 | VIT_00s0194g00340 | VIT_00s0198g00090 |
| VIT_00s0233g00150 | VIT_00s0230g00110 | VIT_05s0020g03500 | VIT_00s0198g00160 | VIT_00s0198g00100 |
| VIT_00s0239g00090 | VIT_00s0230g00140 | VIT_05s0020g03600 | VIT_00s0199g00030 | VIT_00s0198g00120 |
| VIT_00s0239g00100 | VIT_00s0230g00150 | VIT_05s0020g04570 | VIT_00s0199g00040 | VIT_00s0198g00130 |
| VIT_00s0252g00020 | VIT_00s0230g00160 | VIT_05s0020g04970 | VIT_00s0199g00050 | VIT_00s0199g00300 |
| VIT_00s0253g00010 | VIT_00s0231g00030 | VIT_05s0029g00800 | VIT_00s0199g00070 | VIT_00s0201g00060 |
| VIT_00s0256g00100 | VIT_00s0233g00040 | VIT_05s0049g01890 | VIT_00s0199g00190 | VIT_00s0202g00060 |
| VIT_00s0256g00120 | VIT_00s0233g00180 | VIT_05s0049g02360 | VIT_00s0199g00220 | VIT_00s0203g00010 |
| VIT_00s0258g00120 | VIT_00s0238g00070 | VIT_05s0062g00020 | VIT_00s0199g00240 | VIT_00s0203g00070 |
| VIT_00s0258g00140 | VIT_00s0238g00080 | VIT_05s0062g00880 | VIT_00s0202g00020 | VIT_00s0203g00080 |
| VIT_00s0259g00020 | VIT_00s0239g00030 | VIT_05s0062g00910 | VIT_00s0203g00060 | VIT_00s0203g00170 |
| VIT_00s0259g00180 | VIT_00s0239g00040 | VIT_05s0062g01280 | VIT_00s0203g00200 | VIT_00s0203g00210 |
| VIT_00s0260g00070 | VIT_00s0239g00050 | VIT_05s0077g01500 | VIT_00s0204g00080 | VIT_00s0204g00010 |
| VIT_00s0264g00060 | VIT_00s0239g00080 | VIT_05s0077g01710 | VIT_00s0207g00140 | VIT_00s0204g00020 |
| VIT_00s0265g00060 | VIT_00s0245g00040 | VIT_05s0094g00800 | VIT_00s0207g00180 | VIT_00s0207g00020 |
| VIT_00s0267g00040 | VIT_00s0246g00010 | VIT_05s0124g00330 | VIT_00s0207g00230 | VIT_00s0207g00040 |
| VIT_00s0268g00020 | VIT_00s0246g00050 | VIT_06s0004g00290 | VIT_00s0207g00280 | VIT_00s0207g00060 |
| VIT_00s0270g00090 | VIT_00s0246g00080 | VIT_06s0004g00680 | VIT_00s0213g00010 | VIT_00s0207g00070 |
| VIT_00s0271g00090 | VIT_00s0246g00210 | VIT_06s0004g00740 | VIT_00s0215g00040 | VIT_00s0207g00110 |
| VIT_00s0273g00030 | VIT_00s0250g00010 | VIT_06s0004g00750 | VIT_00s0215g00050 | VIT_00s0207g00190 |
| VIT_00s0273g00040 | VIT_00s0250g00060 | VIT_06s0004g02920 | VIT_00s0215g00090 | VIT_00s0207g00200 |
| VIT_00s0274g00050 | VIT_00s0252g00050 | VIT_06s0004g03410 | VIT_00s0215g00110 | VIT_00s0207g00240 |
| VIT_00s0275g00010 | VIT_00s0259g00080 | VIT_06s0004g04140 | VIT_00s0218g00100 | VIT_00s0207g00260 |
| VIT_00s0279g00010 | VIT_00s0259g00110 | VIT_06s0004g04340 | VIT_00s0220g00030 | VIT_00s0208g00040 |
| VIT_00s0279g00040 | VIT_00s0265g00130 | VIT_06s0004g04470 | VIT_00s0220g00070 | VIT_00s0208g00050 |
| VIT_00s0279g00070 | VIT_00s0269g00120 | VIT_06s0004g05860 | VIT_00s0220g00130 | VIT_00s0208g00100 |
| VIT_00s0281g00010 | VIT_00s0282g00020 | VIT_06s0004g08460 | VIT_00s0220g00180 | VIT_00s0211g00010 |
| VIT_00s0282g00010 | VIT_00s0286g00040 | VIT_06s0009g00960 | VIT_00s0222g00010 | VIT_00s0211g00140 |
| VIT_00s0282g00030 | VIT_00s0286g00050 | VIT_06s0009g02210 | VIT_00s0222g00020 | VIT_00s0213g00070 |
| VIT_00s0282g00060 | VIT_00s0286g00110 | VIT_06s0009g02540 | VIT_00s0222g00080 | VIT_00s0213g00080 |
| VIT_00s0285g00030 | VIT_00s0294g00090 | VIT_06s0009g02550 | VIT_00s0222g00090 | VIT_00s0213g00090 |
| VIT_00s0287g00050 | VIT_00s0294g00100 | VIT_06s0009g03590 | VIT_00s0222g00100 | VIT_00s0213g00100 |
| VIT_00s0291g00070 | VIT_00s0313g00080 | VIT_06s0080g00030 | VIT_00s0225g00020 | VIT_00s0214g00040 |
| VIT_00s0291g00080 | VIT_00s0323g00040 | VIT_06s0080g00110 | VIT_00s0225g00060 | VIT_00s0214g00090 |
| VIT_00s0302g00060 | VIT_00s0323g00080 | VIT_06s0080g00440 | VIT_00s0225g00070 | VIT_00s0214g00160 |
| VIT_00s0313g00050 | VIT_00s0324g00060 | VIT_06s0080g00640 | VIT_00s0225g00120 | VIT_00s0218g00040 |
| VIT_00s0316g00020 | VIT_00s0324g00110 | VIT_06s0080g00740 | VIT_00s0225g00130 | VIT_00s0218g00060 |
| VIT_00s0316g00050 | VIT_00s0332g00150 | VIT_07s0005g00470 | VIT_00s0225g00150 | VIT_00s0218g00070 |
| VIT_00s0316g00060 | VIT_00s0332g00160 | VIT_07s0005g00500 | VIT_00s0225g00220 | VIT_00s0218g00120 |
| VIT_00s0317g00010 | VIT_00s0333g00030 | VIT_07s0005g01410 | VIT_00s0226g00070 | VIT_00s0225g00010 |
| VIT_00s0317g00040 | VIT_00s0335g00090 | VIT_07s0005g01640 | VIT_00s0227g00080 | VIT_00s0226g00020 |
| VIT_00s0317g00050 | VIT_00s0337g00010 | VIT_07s0005g02850 | VIT_00s0227g00090 | VIT_00s0226g00110 |
| VIT_00s0317g00090 | VIT_00s0341g00050 | VIT_07s0005g03930 | VIT_00s0227g00100 | VIT_00s0226g00140 |
| VIT_00s0317g00120 | VIT_00s0346g00040 | VIT_07s0031g01460 | VIT_00s0229g00030 | VIT_00s0226g00150 |
| VIT_00s0317g00160 | VIT_00s0360g00040 | VIT_07s0031g01520 | VIT_00s0229g00060 | VIT_00s0226g00160 |
| VIT_00s0319g00040 | VIT_00s0370g00090 | VIT_07s0031g01610 | VIT_00s0229g00080 | VIT_00s0227g00160 |
| VIT_00s0322g00040 | VIT_00s0374g00010 | VIT_07s0031g02040 | VIT_00s0229g00090 | VIT_00s0227g00170 |
| VIT_00s0323g00020 | VIT_00s0379g00040 | VIT_07s0031g02290 | VIT_00s0229g00170 | VIT_00s0229g00070 |
| VIT_00s0323g00030 | VIT_00s0391g00020 | VIT_07s0095g00710 | VIT_00s0229g00180 | VIT_00s0230g00020 |
| VIT_00s0323g00100 | VIT_00s0398g00020 | VIT_07s0104g00160 | VIT_00s0231g00040 | VIT_00s0230g00090 |
| VIT_00s0332g00040 | VIT_00s0398g00060 | VIT_07s0104g00600 | VIT_00s0231g00080 | VIT_00s0239g00090 |
| VIT_00s0333g00020 | VIT_00s0404g00070 | VIT_07s0104g01530 | VIT_00s0233g00030 | VIT_00s0239g00120 |
| VIT_00s0333g00040 | VIT_00s0407g00080 | VIT_07s0129g01120 | VIT_00s0233g00130 | VIT_00s0239g00130 |
| VIT_00s0337g00060 | VIT_00s0408g00010 | VIT_07s0130g00120 | VIT_00s0233g00150 | VIT_00s0246g00140 |
| VIT_00s0342g00010 | VIT_00s0426g00030 | VIT_07s0141g00210 | VIT_00s0233g00160 | VIT_00s0246g00170 |

|                   |                   |                   |                   |                   |
|-------------------|-------------------|-------------------|-------------------|-------------------|
| VIT_00s0342g00020 | VIT_00s0426g00050 | VIT_07s0141g00420 | VIT_00s0238g00090 | VIT_00s0246g00200 |
| VIT_00s0342g00030 | VIT_00s0438g00010 | VIT_07s0141g00530 | VIT_00s0238g00130 | VIT_00s0252g00020 |
| VIT_00s0342g00040 | VIT_00s0445g00020 | VIT_07s0141g00820 | VIT_00s0245g00040 | VIT_00s0253g00010 |
| VIT_00s0344g00010 | VIT_00s0475g00020 | VIT_07s0191g00060 | VIT_00s0246g00050 | VIT_00s0256g00100 |
| VIT_00s0344g00020 | VIT_00s0477g00030 | VIT_07s0191g00260 | VIT_00s0246g00080 | VIT_00s0256g00120 |
| VIT_00s0345g00010 | VIT_00s0483g00030 | VIT_07s0197g00120 | VIT_00s0246g00120 | VIT_00s0258g00070 |
| VIT_00s0346g00010 | VIT_00s0483g00050 | VIT_08s0007g00490 | VIT_00s0246g00210 | VIT_00s0258g00120 |
| VIT_00s0346g00020 | VIT_00s0505g00030 | VIT_08s0007g01740 | VIT_00s0251g00050 | VIT_00s0258g00140 |
| VIT_00s0346g00030 | VIT_00s0510g00050 | VIT_08s0007g03010 | VIT_00s0253g00060 | VIT_00s0259g00180 |
| VIT_00s0346g00070 | VIT_00s0525g00030 | VIT_08s0007g03290 | VIT_00s0253g00140 | VIT_00s0265g00090 |
| VIT_00s0346g00100 | VIT_00s0525g00050 | VIT_08s0007g03850 | VIT_00s0254g00040 | VIT_00s0267g00040 |
| VIT_00s0346g00120 | VIT_00s0532g00040 | VIT_08s0007g05070 | VIT_00s0259g00080 | VIT_00s0268g00020 |
| VIT_00s0347g00030 | VIT_00s0532g00050 | VIT_08s0007g05090 | VIT_00s0259g00110 | VIT_00s0269g00160 |
| VIT_00s0347g00090 | VIT_00s0533g00040 | VIT_08s0007g06490 | VIT_00s0259g00120 | VIT_00s0270g00090 |
| VIT_00s0349g00060 | VIT_00s0558g00020 | VIT_08s0007g06500 | VIT_00s0259g00140 | VIT_00s0271g00090 |
| VIT_00s0352g00030 | VIT_00s0561g00030 | VIT_08s0007g06510 | VIT_00s0259g00150 | VIT_00s0271g00100 |
| VIT_00s0357g00090 | VIT_00s0586g00020 | VIT_08s0007g06710 | VIT_00s0260g00030 | VIT_00s0273g00020 |
| VIT_00s0357g00120 | VIT_00s0590g00020 | VIT_08s0007g06980 | VIT_00s0260g00080 | VIT_00s0273g00040 |
| VIT_00s0358g00020 | VIT_00s0611g00010 | VIT_08s0007g07240 | VIT_00s0262g00090 | VIT_00s0274g00050 |
| VIT_00s0361g00070 | VIT_00s0640g00010 | VIT_08s0007g07450 | VIT_00s0262g00170 | VIT_00s0274g00060 |
| VIT_00s0361g00080 | VIT_00s0685g00020 | VIT_08s0007g07740 | VIT_00s0264g00120 | VIT_00s0275g00010 |
| VIT_00s0365g00010 | VIT_00s0729g00010 | VIT_08s0032g00360 | VIT_00s0265g00030 | VIT_00s0275g00030 |
| VIT_00s0366g00010 | VIT_00s0757g00030 | VIT_08s0032g00800 | VIT_00s0266g00040 | VIT_00s0279g00010 |
| VIT_00s0367g00010 | VIT_00s0762g00030 | VIT_08s0032g00900 | VIT_00s0269g00180 | VIT_00s0279g00040 |
| VIT_00s0369g00010 | VIT_00s0788g00010 | VIT_08s0032g01090 | VIT_00s0270g00010 | VIT_00s0279g00100 |
| VIT_00s0369g00040 | VIT_00s0838g00010 | VIT_08s0032g01130 | VIT_00s0270g00130 | VIT_00s0282g00010 |
| VIT_00s0369g00050 | VIT_00s0878g00020 | VIT_08s0032g01210 | VIT_00s0271g00080 | VIT_00s0282g00030 |
| VIT_00s0371g00010 | VIT_00s1197g00010 | VIT_08s0040g00240 | VIT_00s0274g00070 | VIT_00s0285g00030 |
| VIT_00s0371g00020 | VIT_00s1205g00020 | VIT_08s0040g00290 | VIT_00s0274g00090 | VIT_00s0285g00050 |
| VIT_00s0371g00030 | VIT_00s1213g00020 | VIT_08s0040g01390 | VIT_00s0276g00060 | VIT_00s0287g00010 |
| VIT_00s0380g00030 | VIT_00s1286g00020 | VIT_08s0040g02170 | VIT_00s0281g00020 | VIT_00s0287g00050 |
| VIT_00s0388g00030 | VIT_00s1313g00020 | VIT_08s0056g00530 | VIT_00s0282g00040 | VIT_00s0287g00070 |
| VIT_00s0392g00010 | VIT_00s1331g00010 | VIT_08s0056g00600 | VIT_00s0282g00050 | VIT_00s0287g00080 |
| VIT_00s0396g00010 | VIT_00s1364g00010 | VIT_08s0056g01280 | VIT_00s0286g00140 | VIT_00s0291g00050 |
| VIT_00s0399g00010 | VIT_00s1364g00020 | VIT_08s0058g00750 | VIT_00s0288g00030 | VIT_00s0291g00070 |
| VIT_00s0404g00050 | VIT_00s1395g00010 | VIT_09s0002g00250 | VIT_00s0288g00050 | VIT_00s0291g00080 |
| VIT_00s0404g00100 | VIT_00s1397g00020 | VIT_09s0002g00300 | VIT_00s0288g00070 | VIT_00s0299g00050 |
| VIT_00s0409g00030 | VIT_00s1427g00010 | VIT_09s0002g00610 | VIT_00s0294g00100 | VIT_00s0299g00080 |
| VIT_00s0421g00010 | VIT_00s1455g00020 | VIT_09s0002g00620 | VIT_00s0299g00030 | VIT_00s0299g00090 |
| VIT_00s0425g00010 | VIT_00s1488g00020 | VIT_09s0002g00630 | VIT_00s0299g00110 | VIT_00s0302g00060 |
| VIT_00s0429g00020 | VIT_00s1530g00010 | VIT_09s0002g01490 | VIT_00s0301g00020 | VIT_00s0304g00020 |
| VIT_00s0434g00060 | VIT_00s1600g00010 | VIT_09s0002g01690 | VIT_00s0301g00030 | VIT_00s0308g00030 |
| VIT_00s0437g00010 | VIT_00s1693g00010 | VIT_09s0002g02100 | VIT_00s0301g00040 | VIT_00s0309g00050 |
| VIT_00s0445g00010 | VIT_00s1995g00010 | VIT_09s0002g02520 | VIT_00s0301g00110 | VIT_00s0309g00090 |
| VIT_00s0455g00030 | VIT_00s2034g00010 | VIT_09s0002g03770 | VIT_00s0302g00030 | VIT_00s0313g00050 |
| VIT_00s0462g00010 | VIT_00s2178g00010 | VIT_09s0002g04510 | VIT_00s0304g00050 | VIT_00s0316g00050 |
| VIT_00s0469g00030 | VIT_00s2262g00010 | VIT_09s0002g05780 | VIT_00s0308g00020 | VIT_00s0317g00070 |
| VIT_00s0471g00030 | VIT_00s2313g00010 | VIT_09s0002g06060 | VIT_00s0308g00040 | VIT_00s0319g00050 |
| VIT_00s0477g00010 | VIT_00s2342g00020 | VIT_09s0002g06310 | VIT_00s0313g00020 | VIT_00s0319g00070 |
| VIT_00s0480g00010 | VIT_00s2364g00010 | VIT_09s0002g06350 | VIT_00s0313g00040 | VIT_00s0323g00100 |
| VIT_00s0481g00030 | VIT_00s2377g00010 | VIT_09s0002g06800 | VIT_00s0313g00070 | VIT_00s0324g00090 |
| VIT_00s0483g00020 | VIT_00s2417g00020 | VIT_09s0002g07190 | VIT_00s0313g00080 | VIT_00s0327g00010 |
| VIT_00s0485g00020 | VIT_00s2478g00020 | VIT_09s0002g09050 | VIT_00s0316g00010 | VIT_00s0327g00030 |
| VIT_00s0510g00010 | VIT_00s2481g00010 | VIT_09s0018g01960 | VIT_00s0316g00040 | VIT_00s0332g00040 |
| VIT_00s0516g00010 | VIT_00s2485g00010 | VIT_09s0054g01290 | VIT_00s0317g00100 | VIT_00s0332g00060 |
| VIT_00s0541g00010 | VIT_00s2497g00010 | VIT_09s0096g00500 | VIT_00s0324g00030 | VIT_00s0332g00110 |
| VIT_00s0551g00020 | VIT_00s2512g00010 | VIT_09s0096g00800 | VIT_00s0324g00110 | VIT_00s0333g00020 |

|                   |                   |                   |                   |                   |
|-------------------|-------------------|-------------------|-------------------|-------------------|
| VIT_00s0551g00030 | VIT_00s2576g00010 | VIT_10s0003g00490 | VIT_00s0332g00100 | VIT_00s0333g00040 |
| VIT_00s0551g00040 | VIT_01s0010g00540 | VIT_10s0003g05020 | VIT_00s0333g00070 | VIT_00s0338g00040 |
| VIT_00s0555g00050 | VIT_01s0010g00750 | VIT_10s0003g05070 | VIT_00s0335g00010 | VIT_00s0342g00030 |
| VIT_00s0567g00040 | VIT_01s0010g00870 | VIT_10s0003g05840 | VIT_00s0335g00080 | VIT_00s0346g00100 |
| VIT_00s0568g00020 | VIT_01s0010g00930 | VIT_10s0042g00890 | VIT_00s0340g00040 | VIT_00s0346g00120 |
| VIT_00s0582g00030 | VIT_01s0010g00950 | VIT_10s0071g00230 | VIT_00s0341g00030 | VIT_00s0347g00030 |
| VIT_00s0586g00010 | VIT_01s0010g01230 | VIT_10s0071g00990 | VIT_00s0346g00110 | VIT_00s0349g00060 |
| VIT_00s0590g00010 | VIT_01s0010g01310 | VIT_10s0116g00260 | VIT_00s0353g00050 | VIT_00s0352g00030 |
| VIT_00s0591g00010 | VIT_01s0010g01430 | VIT_10s0116g01840 | VIT_00s0361g00040 | VIT_00s0360g00010 |
| VIT_00s0591g00020 | VIT_01s0010g01450 | VIT_10s0405g00060 | VIT_00s0361g00090 | VIT_00s0360g00020 |
| VIT_00s0592g00020 | VIT_01s0010g01770 | VIT_11s0016g00540 | VIT_00s0370g00010 | VIT_00s0361g00080 |
| VIT_00s0593g00010 | VIT_01s0010g01890 | VIT_11s0016g02040 | VIT_00s0371g00050 | VIT_00s0361g00110 |
| VIT_00s0598g00020 | VIT_01s0010g02070 | VIT_11s0016g03520 | VIT_00s0372g00020 | VIT_00s0367g00010 |
| VIT_00s0612g00010 | VIT_01s0010g02140 | VIT_11s0016g04530 | VIT_00s0372g00030 | VIT_00s0369g00050 |
| VIT_00s0625g00040 | VIT_01s0010g02230 | VIT_11s0037g00140 | VIT_00s0372g00040 | VIT_00s0370g00060 |
| VIT_00s0634g00030 | VIT_01s0010g02340 | VIT_11s0037g00180 | VIT_00s0372g00070 | VIT_00s0370g00070 |
| VIT_00s0642g00010 | VIT_01s0010g02350 | VIT_11s0037g00520 | VIT_00s0372g00080 | VIT_00s0371g00060 |
| VIT_00s0646g00030 | VIT_01s0010g02380 | VIT_11s0065g00450 | VIT_00s0373g00040 | VIT_00s0372g00010 |
| VIT_00s0647g00010 | VIT_01s0010g02400 | VIT_11s0103g00180 | VIT_00s0375g00050 | VIT_00s0380g00030 |
| VIT_00s0652g00010 | VIT_01s0010g02590 | VIT_11s0103g00270 | VIT_00s0378g00040 | VIT_00s0388g00040 |
| VIT_00s0662g00010 | VIT_01s0010g03270 | VIT_11s0118g00450 | VIT_00s0379g00050 | VIT_00s0392g00010 |
| VIT_00s0663g00030 | VIT_01s0010g03330 | VIT_12s0028g00260 | VIT_00s0380g00020 | VIT_00s0394g00040 |
| VIT_00s0669g00010 | VIT_01s0010g03610 | VIT_12s0028g01750 | VIT_00s0386g00020 | VIT_00s0396g00010 |
| VIT_00s0670g00010 | VIT_01s0010g03890 | VIT_12s0028g02020 | VIT_00s0386g00040 | VIT_00s0399g00010 |
| VIT_00s0682g00010 | VIT_01s0010g03970 | VIT_12s0028g03150 | VIT_00s0389g00010 | VIT_00s0400g00010 |
| VIT_00s0682g00020 | VIT_01s0010g03990 | VIT_12s0028g03430 | VIT_00s0389g00040 | VIT_00s0404g00050 |
| VIT_00s0684g00020 | VIT_01s0011g00040 | VIT_12s0035g00830 | VIT_00s0391g00020 | VIT_00s0404g00100 |
| VIT_00s0684g00030 | VIT_01s0011g00140 | VIT_12s0035g01020 | VIT_00s0391g00030 | VIT_00s0410g00030 |
| VIT_00s0686g00010 | VIT_01s0011g00170 | VIT_12s0035g01100 | VIT_00s0391g00070 | VIT_00s0410g00040 |
| VIT_00s0724g00010 | VIT_01s0011g00190 | VIT_12s0035g01400 | VIT_00s0394g00010 | VIT_00s0411g00030 |
| VIT_00s0726g00020 | VIT_01s0011g00220 | VIT_12s0035g01990 | VIT_00s0397g00010 | VIT_00s0411g00040 |
| VIT_00s0742g00020 | VIT_01s0011g00340 | VIT_12s0055g00310 | VIT_00s0397g00050 | VIT_00s0414g00020 |
| VIT_00s0757g00010 | VIT_01s0011g00390 | VIT_12s0057g00880 | VIT_00s0398g00060 | VIT_00s0415g00020 |
| VIT_00s0768g00010 | VIT_01s0011g00460 | VIT_12s0057g01290 | VIT_00s0400g00020 | VIT_00s0420g00010 |
| VIT_00s0769g00010 | VIT_01s0011g00490 | VIT_12s0057g01340 | VIT_00s0400g00030 | VIT_00s0426g00010 |
| VIT_00s0771g00010 | VIT_01s0011g00850 | VIT_12s0059g02710 | VIT_00s0404g00070 | VIT_00s0429g00020 |
| VIT_00s0776g00010 | VIT_01s0011g00860 | VIT_12s0142g00500 | VIT_00s0406g00010 | VIT_00s0434g00060 |
| VIT_00s0780g00010 | VIT_01s0011g00970 | VIT_13s0019g02810 | VIT_00s0407g00030 | VIT_00s0437g00010 |
| VIT_00s0780g00020 | VIT_01s0011g01450 | VIT_13s0019g03940 | VIT_00s0407g00050 | VIT_00s0437g00020 |
| VIT_00s0790g00010 | VIT_01s0011g01650 | VIT_13s0019g04150 | VIT_00s0407g00080 | VIT_00s0448g00020 |
| VIT_00s0804g00010 | VIT_01s0011g01660 | VIT_13s0019g04930 | VIT_00s0421g00040 | VIT_00s0455g00030 |
| VIT_00s0820g00010 | VIT_01s0011g01840 | VIT_13s0047g01170 | VIT_00s0426g00040 | VIT_00s0463g00050 |
| VIT_00s0841g00030 | VIT_01s0011g01930 | VIT_13s0064g00040 | VIT_00s0429g00010 | VIT_00s0469g00030 |
| VIT_00s0848g00010 | VIT_01s0011g02080 | VIT_13s0064g01360 | VIT_00s0432g00010 | VIT_00s0471g00030 |
| VIT_00s0865g00030 | VIT_01s0011g02180 | VIT_13s0067g01040 | VIT_00s0432g00020 | VIT_00s0471g00040 |
| VIT_00s0868g00020 | VIT_01s0011g02270 | VIT_13s0067g02540 | VIT_00s0434g00080 | VIT_00s0477g00040 |
| VIT_00s0871g00010 | VIT_01s0011g02410 | VIT_13s0073g00250 | VIT_00s0437g00070 | VIT_00s0480g00060 |
| VIT_00s0873g00010 | VIT_01s0011g02450 | VIT_13s0073g00290 | VIT_00s0445g00020 | VIT_00s0480g00070 |
| VIT_00s0912g00010 | VIT_01s0011g02560 | VIT_13s0073g00330 | VIT_00s0454g00020 | VIT_00s0480g00090 |
| VIT_00s0922g00010 | VIT_01s0011g02590 | VIT_13s0101g00090 | VIT_00s0454g00030 | VIT_00s0480g00100 |
| VIT_00s0956g00010 | VIT_01s0011g02670 | VIT_13s0156g00560 | VIT_00s0455g00020 | VIT_00s0504g00010 |
| VIT_00s0958g00020 | VIT_01s0011g02860 | VIT_13s0175g00180 | VIT_00s0455g00050 | VIT_00s0504g00020 |
| VIT_00s0960g00010 | VIT_01s0011g03030 | VIT_14s0006g00830 | VIT_00s0456g00030 | VIT_00s0505g00050 |
| VIT_00s0960g00040 | VIT_01s0011g03200 | VIT_14s0006g01720 | VIT_00s0456g00040 | VIT_00s0510g00010 |
| VIT_00s0988g00010 | VIT_01s0011g03460 | VIT_14s0006g02100 | VIT_00s0459g00020 | VIT_00s0516g00010 |
| VIT_00s1011g00010 | VIT_01s0011g03470 | VIT_14s0006g02170 | VIT_00s0459g00030 | VIT_00s0527g00010 |
| VIT_00s1034g00010 | VIT_01s0011g03640 | VIT_14s0006g03080 | VIT_00s0467g00030 | VIT_00s0532g00070 |

|                   |                   |                   |                   |                   |
|-------------------|-------------------|-------------------|-------------------|-------------------|
| VIT_00s1045g00010 | VIT_01s0011g03790 | VIT_14s0030g01490 | VIT_00s0467g00040 | VIT_00s0541g00010 |
| VIT_00s1045g00020 | VIT_01s0011g03830 | VIT_14s0030g02280 | VIT_00s0471g00050 | VIT_00s0541g00020 |
| VIT_00s1211g00020 | VIT_01s0011g04050 | VIT_14s0036g00040 | VIT_00s0475g00030 | VIT_00s0551g00030 |
| VIT_00s1217g00010 | VIT_01s0011g04540 | VIT_14s0036g01380 | VIT_00s0477g00070 | VIT_00s0551g00040 |
| VIT_00s1227g00010 | VIT_01s0011g04580 | VIT_14s0060g01520 | VIT_00s0484g00020 | VIT_00s0567g00050 |
| VIT_00s1238g00010 | VIT_01s0011g04950 | VIT_14s0060g01930 | VIT_00s0484g00040 | VIT_00s0568g00010 |
| VIT_00s1247g00020 | VIT_01s0011g04970 | VIT_14s0060g02160 | VIT_00s0505g00020 | VIT_00s0581g00010 |
| VIT_00s1274g00010 | VIT_01s0011g04980 | VIT_14s0060g02670 | VIT_00s0515g00010 | VIT_00s0582g00030 |
| VIT_00s1286g00010 | VIT_01s0011g05290 | VIT_14s0066g00920 | VIT_00s0515g00040 | VIT_00s0586g00010 |
| VIT_00s1287g00010 | VIT_01s0011g05540 | VIT_14s0066g01600 | VIT_00s0521g00010 | VIT_00s0591g00010 |
| VIT_00s1291g00020 | VIT_01s0011g05620 | VIT_14s0066g01630 | VIT_00s0522g00020 | VIT_00s0591g00020 |
| VIT_00s1323g00010 | VIT_01s0011g05630 | VIT_14s0068g00410 | VIT_00s0525g00010 | VIT_00s0592g00020 |
| VIT_00s1338g00010 | VIT_01s0011g05840 | VIT_14s0068g01050 | VIT_00s0531g00040 | VIT_00s0593g00010 |
| VIT_00s1348g00010 | VIT_01s0011g05910 | VIT_14s0068g01550 | VIT_00s0561g00030 | VIT_00s0598g00020 |
| VIT_00s1351g00010 | VIT_01s0011g06200 | VIT_14s0081g00270 | VIT_00s0567g00060 | VIT_00s0601g00010 |
| VIT_00s1356g00020 | VIT_01s0011g06430 | VIT_14s0081g00670 | VIT_00s0572g00020 | VIT_00s0625g00040 |
| VIT_00s1380g00010 | VIT_01s0026g00040 | VIT_14s0083g00490 | VIT_00s0585g00020 | VIT_00s0641g00010 |
| VIT_00s1380g00020 | VIT_01s0026g00180 | VIT_14s0108g00560 | VIT_00s0601g00030 | VIT_00s0642g00010 |
| VIT_00s1405g00010 | VIT_01s0026g00310 | VIT_14s0108g00570 | VIT_00s0615g00010 | VIT_00s0646g00030 |
| VIT_00s1405g00020 | VIT_01s0026g00590 | VIT_14s0108g00810 | VIT_00s0620g00020 | VIT_00s0650g00040 |
| VIT_00s1463g00010 | VIT_01s0026g01040 | VIT_14s0108g01480 | VIT_00s0629g00020 | VIT_00s0652g00010 |
| VIT_00s1543g00010 | VIT_01s0026g01120 | VIT_14s0128g00850 | VIT_00s0630g00010 | VIT_00s0662g00010 |
| VIT_00s1569g00020 | VIT_01s0026g01200 | VIT_14s0219g00140 | VIT_00s0659g00010 | VIT_00s0663g00030 |
| VIT_00s1613g00010 | VIT_01s0026g01340 | VIT_15s0021g00830 | VIT_00s0665g00050 | VIT_00s0669g00010 |
| VIT_00s1664g00010 | VIT_01s0026g01410 | VIT_15s0021g01530 | VIT_00s0674g00010 | VIT_00s0676g00040 |
| VIT_00s1665g00010 | VIT_01s0026g01510 | VIT_15s0021g01850 | VIT_00s0682g00050 | VIT_00s0684g00020 |
| VIT_00s1679g00010 | VIT_01s0026g01550 | VIT_15s0024g00760 | VIT_00s0684g00010 | VIT_00s0684g00030 |
| VIT_00s1683g00010 | VIT_01s0026g01720 | VIT_15s0024g01270 | VIT_00s0686g00030 | VIT_00s0684g00040 |
| VIT_00s1688g00010 | VIT_01s0026g01870 | VIT_15s0046g00630 | VIT_00s0687g00010 | VIT_00s0686g00010 |
| VIT_00s1737g00010 | VIT_01s0026g02190 | VIT_15s0046g01030 | VIT_00s0687g00020 | VIT_00s0686g00020 |
| VIT_00s1818g00020 | VIT_01s0026g02350 | VIT_15s0046g01120 | VIT_00s0729g00010 | VIT_00s0705g00010 |
| VIT_00s1871g00010 | VIT_01s0026g02770 | VIT_15s0046g01740 | VIT_00s0748g00020 | VIT_00s0724g00010 |
| VIT_00s1881g00010 | VIT_01s0113g00400 | VIT_15s0046g02680 | VIT_00s0753g00030 | VIT_00s0726g00020 |
| VIT_00s1927g00010 | VIT_01s0113g00430 | VIT_15s0046g02790 | VIT_00s0772g00010 | VIT_00s0733g00010 |
| VIT_00s1944g00010 | VIT_01s0113g00460 | VIT_15s0048g00570 | VIT_00s0779g00020 | VIT_00s0742g00020 |
| VIT_00s2207g00010 | VIT_01s0127g00880 | VIT_15s0048g00750 | VIT_00s0783g00010 | VIT_00s0753g00020 |
| VIT_00s2265g00010 | VIT_01s0127g00890 | VIT_15s0048g00810 | VIT_00s0787g00020 | VIT_00s0757g00010 |
| VIT_00s2271g00010 | VIT_01s0127g00900 | VIT_15s0048g00820 | VIT_00s0788g00010 | VIT_00s0768g00010 |
| VIT_00s2287g00010 | VIT_01s0137g00020 | VIT_15s0048g00890 | VIT_00s0802g00020 | VIT_00s0771g00010 |
| VIT_00s2288g00010 | VIT_01s0137g00070 | VIT_15s0048g01290 | VIT_00s0818g00010 | VIT_00s0780g00010 |
| VIT_00s2300g00010 | VIT_01s0137g00080 | VIT_15s0107g00180 | VIT_00s0838g00020 | VIT_00s0780g00020 |
| VIT_00s2304g00010 | VIT_01s0137g00300 | VIT_16s0013g00610 | VIT_00s0841g00020 | VIT_00s0790g00010 |
| VIT_00s2317g00010 | VIT_01s0137g00350 | VIT_16s0013g01640 | VIT_00s0868g00010 | VIT_00s0790g00020 |
| VIT_00s2397g00010 | VIT_01s0146g00010 | VIT_16s0022g01840 | VIT_00s0878g00020 | VIT_00s0801g00010 |
| VIT_00s2424g00010 | VIT_01s0146g00030 | VIT_16s0039g00240 | VIT_00s0888g00010 | VIT_00s0809g00020 |
| VIT_00s2480g00010 | VIT_01s0146g00090 | VIT_16s0039g01820 | VIT_00s0921g00020 | VIT_00s0809g00030 |
| VIT_00s2562g00010 | VIT_01s0146g00170 | VIT_16s0039g02120 | VIT_00s0936g00010 | VIT_00s0820g00010 |
| VIT_00s2623g00010 | VIT_01s0146g00210 | VIT_16s0039g02240 | VIT_00s0958g00010 | VIT_00s0841g00030 |
| VIT_00s2698g00010 | VIT_01s0146g00230 | VIT_16s0039g02850 | VIT_00s0961g00020 | VIT_00s0847g00010 |
| VIT_00s2752g00010 | VIT_01s0146g00330 | VIT_16s0050g00310 | VIT_00s0999g00010 | VIT_00s0848g00010 |
| VIT_00s2785g00010 | VIT_01s0146g00430 | VIT_16s0050g00650 | VIT_00s1002g00020 | VIT_00s0857g00010 |
| VIT_00s2814g00010 | VIT_01s0146g00470 | VIT_16s0050g01180 | VIT_00s1190g00010 | VIT_00s0872g00010 |
| VIT_00s2851g00010 | VIT_01s0150g00060 | VIT_16s0050g02450 | VIT_00s1205g00020 | VIT_00s0873g00020 |
| VIT_00s2864g00010 | VIT_01s0150g00080 | VIT_16s0050g02600 | VIT_00s1217g00020 | VIT_00s0878g00030 |
| VIT_00s2887g00010 | VIT_01s0150g00100 | VIT_16s0050g02620 | VIT_00s1261g00010 | VIT_00s0904g00010 |
| VIT_01s0010g00060 | VIT_01s0150g00160 | VIT_16s0098g00370 | VIT_00s1278g00010 | VIT_00s0941g00010 |
| VIT_01s0010g00040 | VIT_01s0150g00300 | VIT_16s0098g00610 | VIT_00s1311g00010 | VIT_00s0956g00010 |

|                   |                    |                   |                   |                   |
|-------------------|--------------------|-------------------|-------------------|-------------------|
| VIT_01s0010g00600 | VIT_01s0150g00370  | VIT_16s0098g00910 | VIT_00s1312g00010 | VIT_00s0960g00010 |
| VIT_01s0010g00630 | VIT_01s0150g00420  | VIT_16s0100g00060 | VIT_00s1313g00010 | VIT_00s0960g00040 |
| VIT_01s0010g00680 | VIT_01s0244g00060  | VIT_16s0115g00200 | VIT_00s1313g00020 | VIT_00s0975g00010 |
| VIT_01s0010g00720 | VIT_02s0012g000310 | VIT_17s0000g00750 | VIT_00s1331g00010 | VIT_00s0986g00010 |
| VIT_01s0010g00940 | VIT_02s0012g000570 | VIT_17s0000g01270 | VIT_00s1339g00010 | VIT_00s0988g00010 |
| VIT_01s0010g01030 | VIT_02s0012g000760 | VIT_17s0000g01350 | VIT_00s1351g00020 | VIT_00s1045g00010 |
| VIT_01s0010g01140 | VIT_02s0012g01000  | VIT_17s0000g02190 | VIT_00s1352g00010 | VIT_00s1045g00020 |
| VIT_01s0010g01570 | VIT_02s0012g01110  | VIT_17s0000g02310 | VIT_00s1359g00020 | VIT_00s1211g00020 |
| VIT_01s0010g01710 | VIT_02s0012g01170  | VIT_17s0000g03550 | VIT_00s1364g00020 | VIT_00s1217g00010 |
| VIT_01s0010g01720 | VIT_02s0012g01380  | VIT_17s0000g03620 | VIT_00s1372g00020 | VIT_00s1232g00030 |
| VIT_01s0010g01730 | VIT_02s0012g01620  | VIT_17s0000g04630 | VIT_00s1386g00010 | VIT_00s1247g00020 |
| VIT_01s0010g01780 | VIT_02s0012g01780  | VIT_17s0000g05150 | VIT_00s1403g00010 | VIT_00s1274g00010 |
| VIT_01s0010g01840 | VIT_02s0012g02000  | VIT_17s0000g06030 | VIT_00s1428g00020 | VIT_00s1287g00010 |
| VIT_01s0010g02030 | VIT_02s0012g02540  | VIT_17s0000g07130 | VIT_00s1430g00010 | VIT_00s1291g00020 |
| VIT_01s0010g02050 | VIT_02s0012g02570  | VIT_17s0000g07680 | VIT_00s1455g00020 | VIT_00s1317g00010 |
| VIT_01s0010g02160 | VIT_02s0012g02650  | VIT_17s0000g08710 | VIT_00s1458g00010 | VIT_00s1321g00010 |
| VIT_01s0010g02200 | VIT_02s0012g02660  | VIT_17s0000g09330 | VIT_00s1488g00020 | VIT_00s1323g00010 |
| VIT_01s0010g02290 | VIT_02s0012g02670  | VIT_17s0000g09830 | VIT_00s1491g00020 | VIT_00s1331g00020 |
| VIT_01s0010g02420 | VIT_02s0012g02790  | VIT_17s0053g00980 | VIT_00s1501g00010 | VIT_00s1338g00010 |
| VIT_01s0010g02470 | VIT_02s0025g00180  | VIT_17s0053g01060 | VIT_00s1530g00010 | VIT_00s1338g00020 |
| VIT_01s0010g02550 | VIT_02s0025g00430  | VIT_17s0119g00090 | VIT_00s1553g00010 | VIT_00s1351g00010 |
| VIT_01s0010g02570 | VIT_02s0025g00930  | VIT_18s0001g02090 | VIT_00s1584g00010 | VIT_00s1355g00020 |
| VIT_01s0010g02580 | VIT_02s0025g00950  | VIT_18s0001g03590 | VIT_00s1603g00010 | VIT_00s1356g00020 |
| VIT_01s0010g02600 | VIT_02s0025g01110  | VIT_18s0001g03830 | VIT_00s1618g00010 | VIT_00s1375g00010 |
| VIT_01s0010g02620 | VIT_02s0025g01130  | VIT_18s0001g04610 | VIT_00s1623g00010 | VIT_00s1380g00010 |
| VIT_01s0010g02650 | VIT_02s0025g01390  | VIT_18s0001g05970 | VIT_00s1675g00010 | VIT_00s1380g00020 |
| VIT_01s0010g02920 | VIT_02s0025g01440  | VIT_18s0001g06090 | VIT_00s1682g00010 | VIT_00s1405g00010 |
| VIT_01s0010g03370 | VIT_02s0025g01770  | VIT_18s0001g07020 | VIT_00s1682g00020 | VIT_00s1405g00020 |
| VIT_01s0010g03380 | VIT_02s0025g01890  | VIT_18s0001g07060 | VIT_00s1814g00010 | VIT_00s1455g00010 |
| VIT_01s0010g03560 | VIT_02s0025g01920  | VIT_18s0001g07670 | VIT_00s1818g00010 | VIT_00s1543g00010 |
| VIT_01s0010g03600 | VIT_02s0025g01930  | VIT_18s0001g07750 | VIT_00s1869g00010 | VIT_00s1569g00020 |
| VIT_01s0010g03620 | VIT_02s0025g02090  | VIT_18s0001g08500 | VIT_00s1937g00010 | VIT_00s1613g00010 |
| VIT_01s0010g03670 | VIT_02s0025g02470  | VIT_18s0001g10180 | VIT_00s2015g00020 | VIT_00s1658g00010 |
| VIT_01s0010g03730 | VIT_02s0025g02570  | VIT_18s0001g10390 | VIT_00s2038g00010 | VIT_00s1679g00010 |
| VIT_01s0010g03750 | VIT_02s0025g02580  | VIT_18s0001g11150 | VIT_00s2077g00020 | VIT_00s1683g00010 |
| VIT_01s0010g03760 | VIT_02s0025g02640  | VIT_18s0001g11880 | VIT_00s2086g00010 | VIT_00s1688g00010 |
| VIT_01s0010g03770 | VIT_02s0025g02840  | VIT_18s0001g13890 | VIT_00s2349g00010 | VIT_00s1944g00010 |
| VIT_01s0010g03820 | VIT_02s0025g03210  | VIT_18s0001g13950 | VIT_00s2376g00010 | VIT_00s1959g00010 |
| VIT_01s0010g03950 | VIT_02s0025g03970  | VIT_18s0001g14080 | VIT_00s2417g00020 | VIT_00s2037g00010 |
| VIT_01s0011g00230 | VIT_02s0025g04530  | VIT_18s0001g14850 | VIT_00s2430g00010 | VIT_00s2044g00010 |
| VIT_01s0011g00240 | VIT_02s0025g04850  | VIT_18s0041g00240 | VIT_00s2481g00010 | VIT_00s2081g00010 |
| VIT_01s0011g00450 | VIT_02s0025g04860  | VIT_18s0041g01210 | VIT_00s2483g00010 | VIT_00s2171g00010 |
| VIT_01s0011g00480 | VIT_02s0025g05040  | VIT_18s0072g00350 | VIT_00s2504g00010 | VIT_00s2201g00010 |
| VIT_01s0011g00520 | VIT_02s0033g00120  | VIT_18s0072g00400 | VIT_00s2507g00010 | VIT_00s2263g00010 |
| VIT_01s0011g00890 | VIT_02s0033g00160  | VIT_18s0075g00060 | VIT_00s2542g00010 | VIT_00s2265g00010 |
| VIT_01s0011g00920 | VIT_02s0087g00060  | VIT_18s0075g00420 | VIT_00s2634g00010 | VIT_00s2287g00010 |
| VIT_01s0011g00930 | VIT_02s0087g00100  | VIT_18s0075g00800 | VIT_00s2648g00010 | VIT_00s2288g00010 |
| VIT_01s0011g01070 | VIT_02s0087g00380  | VIT_18s0089g00820 | VIT_00s2740g00010 | VIT_00s2290g00010 |
| VIT_01s0011g01100 | VIT_02s0087g00440  | VIT_18s0089g00930 | VIT_00s2745g00010 | VIT_00s2304g00010 |
| VIT_01s0011g01110 | VIT_02s0087g00690  | VIT_18s0122g00600 | VIT_00s2770g00010 | VIT_00s2317g00010 |
| VIT_01s0011g01120 | VIT_02s0087g00720  | VIT_18s0122g00880 | VIT_01s0010g00450 | VIT_00s2379g00010 |
| VIT_01s0011g01130 | VIT_02s0087g00840  | VIT_18s0157g00200 | VIT_01s0010g00510 | VIT_00s2397g00010 |
| VIT_01s0011g01170 | VIT_02s0109g00420  | VIT_19s0014g01570 | VIT_01s0010g00560 | VIT_00s2424g00010 |
| VIT_01s0011g01210 | VIT_02s0154g00010  | VIT_19s0014g02210 | VIT_01s0010g00780 | VIT_00s2440g00010 |
| VIT_01s0011g01290 | VIT_02s0154g00190  | VIT_19s0014g02680 | VIT_01s0010g00980 | VIT_00s2531g00010 |
| VIT_01s0011g01360 | VIT_02s0154g00450  | VIT_19s0014g03070 | VIT_01s0010g00990 | VIT_00s2549g00010 |
| VIT_01s0011g01390 | VIT_02s0236g00150  | VIT_19s0014g04770 | VIT_01s0010g01000 | VIT_00s2564g00010 |

|                   |                   |                   |                   |                   |
|-------------------|-------------------|-------------------|-------------------|-------------------|
| VIT_01s0011g01400 | VIT_02s0241g00090 | VIT_19s0014g05380 | VIT_01s0010g01130 | VIT_00s2574g00010 |
| VIT_01s0011g01410 | VIT_03s0017g00370 | VIT_19s0015g00150 | VIT_01s0010g01210 | VIT_00s2604g00010 |
| VIT_01s0011g01420 | VIT_03s0017g00390 | VIT_19s0015g01110 | VIT_01s0010g01290 | VIT_00s2608g00010 |
| VIT_01s0011g01470 | VIT_03s0017g00640 | VIT_19s0090g00470 | VIT_01s0010g01310 | VIT_00s2608g00020 |
| VIT_01s0011g01510 | VIT_03s0017g01290 |                   | VIT_01s0010g01440 | VIT_00s2643g00010 |
| VIT_01s0011g01540 | VIT_03s0017g01640 |                   | VIT_01s0010g01490 | VIT_00s2698g00010 |
| VIT_01s0011g01610 | VIT_03s0017g02220 |                   | VIT_01s0010g01590 | VIT_00s2704g00010 |
| VIT_01s0011g01620 | VIT_03s0038g00050 |                   | VIT_01s0010g01830 | VIT_00s2705g00010 |
| VIT_01s0011g01670 | VIT_03s0038g00320 |                   | VIT_01s0010g01850 | VIT_00s2752g00010 |
| VIT_01s0011g01700 | VIT_03s0038g00410 |                   | VIT_01s0010g01890 | VIT_00s2814g00010 |
| VIT_01s0011g01940 | VIT_03s0038g00740 |                   | VIT_01s0010g02040 | VIT_00s2864g00010 |
| VIT_01s0011g01980 | VIT_03s0038g00760 |                   | VIT_01s0010g02100 | VIT_00s2887g00010 |
| VIT_01s0011g02020 | VIT_03s0038g00880 |                   | VIT_01s0010g02140 | VIT_01s0010g00060 |
| VIT_01s0011g02060 | VIT_03s0038g00970 |                   | VIT_01s0010g02150 | VIT_01s0010g00600 |
| VIT_01s0011g02230 | VIT_03s0038g01240 |                   | VIT_01s0010g02210 | VIT_01s0010g00630 |
| VIT_01s0011g02700 | VIT_03s0038g01380 |                   | VIT_01s0010g02310 | VIT_01s0010g00640 |
| VIT_01s0011g03090 | VIT_03s0038g02010 |                   | VIT_01s0010g02360 | VIT_01s0010g00650 |
| VIT_01s0011g03220 | VIT_03s0038g02020 |                   | VIT_01s0010g02400 | VIT_01s0010g00680 |
| VIT_01s0011g03380 | VIT_03s0038g02030 |                   | VIT_01s0010g02440 | VIT_01s0010g00720 |
| VIT_01s0011g03580 | VIT_03s0038g02390 |                   | VIT_01s0010g02460 | VIT_01s0010g00730 |
| VIT_01s0011g03690 | VIT_03s0038g02630 |                   | VIT_01s0010g02610 | VIT_01s0010g00900 |
| VIT_01s0011g03700 | VIT_03s0038g02640 |                   | VIT_01s0010g02680 | VIT_01s0010g00920 |
| VIT_01s0011g03710 | VIT_03s0038g02890 |                   | VIT_01s0010g02690 | VIT_01s0010g00940 |
| VIT_01s0011g03870 | VIT_03s0038g03920 |                   | VIT_01s0010g02810 | VIT_01s0010g01010 |
| VIT_01s0011g03930 | VIT_03s0038g04010 |                   | VIT_01s0010g02900 | VIT_01s0010g01030 |
| VIT_01s0011g03950 | VIT_03s0038g04020 |                   | VIT_01s0010g03040 | VIT_01s0010g01120 |
| VIT_01s0011g03990 | VIT_03s0038g04060 |                   | VIT_01s0010g03050 | VIT_01s0010g01140 |
| VIT_01s0011g04000 | VIT_03s0038g04090 |                   | VIT_01s0010g03070 | VIT_01s0010g01170 |
| VIT_01s0011g04020 | VIT_03s0038g04200 |                   | VIT_01s0010g03200 | VIT_01s0010g01380 |
| VIT_01s0011g04120 | VIT_03s0038g04320 |                   | VIT_01s0010g03210 | VIT_01s0010g01570 |
| VIT_01s0011g04290 | VIT_03s0038g04400 |                   | VIT_01s0010g03230 | VIT_01s0010g01650 |
| VIT_01s0011g04300 | VIT_03s0038g04460 |                   | VIT_01s0010g03360 | VIT_01s0010g01710 |
| VIT_01s0011g04320 | VIT_03s0038g04480 |                   | VIT_01s0010g03390 | VIT_01s0010g01720 |
| VIT_01s0011g04380 | VIT_03s0063g00320 |                   | VIT_01s0010g03430 | VIT_01s0010g01840 |
| VIT_01s0011g04510 | VIT_03s0063g00370 |                   | VIT_01s0010g03690 | VIT_01s0010g01870 |
| VIT_01s0011g04550 | VIT_03s0063g00450 |                   | VIT_01s0010g03870 | VIT_01s0010g01900 |
| VIT_01s0011g04600 | VIT_03s0063g00490 |                   | VIT_01s0011g00030 | VIT_01s0010g02030 |
| VIT_01s0011g04820 | VIT_03s0063g00530 |                   | VIT_01s0011g00070 | VIT_01s0010g02050 |
| VIT_01s0011g04990 | VIT_03s0063g00570 |                   | VIT_01s0011g00160 | VIT_01s0010g02160 |
| VIT_01s0011g05040 | VIT_03s0063g00610 |                   | VIT_01s0011g00250 | VIT_01s0010g02190 |
| VIT_01s0011g05050 | VIT_03s0063g00760 |                   | VIT_01s0011g00400 | VIT_01s0010g02200 |
| VIT_01s0011g05180 | VIT_03s0063g01060 |                   | VIT_01s0011g00500 | VIT_01s0010g02290 |
| VIT_01s0011g05320 | VIT_03s0063g01390 |                   | VIT_01s0011g00580 | VIT_01s0010g02420 |
| VIT_01s0011g05420 | VIT_03s0063g01460 |                   | VIT_01s0011g00600 | VIT_01s0010g02470 |
| VIT_01s0011g05580 | VIT_03s0063g01960 |                   | VIT_01s0011g00830 | VIT_01s0010g02520 |
| VIT_01s0011g05650 | VIT_03s0063g01980 |                   | VIT_01s0011g01050 | VIT_01s0010g02530 |
| VIT_01s0011g05740 | VIT_03s0063g02440 |                   | VIT_01s0011g01200 | VIT_01s0010g02540 |
| VIT_01s0011g05800 | VIT_03s0063g02670 |                   | VIT_01s0011g01280 | VIT_01s0010g02550 |
| VIT_01s0011g05960 | VIT_03s0088g00170 |                   | VIT_01s0011g01630 | VIT_01s0010g02570 |
| VIT_01s0011g06020 | VIT_03s0088g00190 |                   | VIT_01s0011g01640 | VIT_01s0010g02600 |
| VIT_01s0011g06070 | VIT_03s0088g00420 |                   | VIT_01s0011g01720 | VIT_01s0010g02640 |
| VIT_01s0011g06150 | VIT_03s0088g00460 |                   | VIT_01s0011g01730 | VIT_01s0010g02750 |
| VIT_01s0011g06320 | VIT_03s0088g00730 |                   | VIT_01s0011g01780 | VIT_01s0010g02960 |
| VIT_01s0011g06600 | VIT_03s0088g01170 |                   | VIT_01s0011g01820 | VIT_01s0010g03020 |
| VIT_01s0011g06640 | VIT_03s0088g01260 |                   | VIT_01s0011g01920 | VIT_01s0010g03410 |
| VIT_01s0026g00100 | VIT_03s0091g00100 |                   | VIT_01s0011g01930 | VIT_01s0010g03620 |
| VIT_01s0026g00270 | VIT_03s0091g00110 |                   | VIT_01s0011g01960 | VIT_01s0010g03680 |



|                   |                   |                   |                   |
|-------------------|-------------------|-------------------|-------------------|
| VIT_01s0026g00540 | VIT_03s0091g00120 | VIT_01s0011g02180 | VIT_01s0010g03730 |
| VIT_01s0026g00670 | VIT_03s0091g00200 | VIT_01s0011g02200 | VIT_01s0010g03770 |
| VIT_01s0026g00680 | VIT_03s0091g00360 | VIT_01s0011g02310 | VIT_01s0010g03820 |
| VIT_01s0026g00700 | VIT_03s0091g00580 | VIT_01s0011g02330 | VIT_01s0010g03840 |
| VIT_01s0026g00820 | VIT_03s0091g00760 | VIT_01s0011g02430 | VIT_01s0010g03880 |
| VIT_01s0026g00920 | VIT_03s0091g00950 | VIT_01s0011g02470 | VIT_01s0010g03940 |
| VIT_01s0026g00930 | VIT_03s0091g00990 | VIT_01s0011g02570 | VIT_01s0010g03980 |
| VIT_01s0026g01280 | VIT_03s0091g01100 | VIT_01s0011g02620 | VIT_01s0011g00130 |
| VIT_01s0026g01440 | VIT_03s0091g01190 | VIT_01s0011g02670 | VIT_01s0011g00150 |
| VIT_01s0026g01660 | VIT_03s0097g00130 | VIT_01s0011g02730 | VIT_01s0011g00230 |
| VIT_01s0026g01670 | VIT_03s0110g00230 | VIT_01s0011g02740 | VIT_01s0011g00260 |
| VIT_01s0026g01750 | VIT_03s0110g00350 | VIT_01s0011g02850 | VIT_01s0011g00450 |
| VIT_01s0026g01820 | VIT_03s0132g00150 | VIT_01s0011g02860 | VIT_01s0011g00480 |
| VIT_01s0026g01920 | VIT_03s0167g00070 | VIT_01s0011g02920 | VIT_01s0011g00520 |
| VIT_01s0026g02110 | VIT_03s0167g00100 | VIT_01s0011g02950 | VIT_01s0011g00630 |
| VIT_01s0026g02430 | VIT_03s0180g00060 | VIT_01s0011g02960 | VIT_01s0011g00660 |
| VIT_01s0026g02490 | VIT_03s0180g00120 | VIT_01s0011g03020 | VIT_01s0011g00890 |
| VIT_01s0026g02510 | VIT_04s0008g00200 | VIT_01s0011g03040 | VIT_01s0011g00900 |
| VIT_01s0026g02560 | VIT_04s0008g00250 | VIT_01s0011g03110 | VIT_01s0011g00920 |
| VIT_01s0026g02640 | VIT_04s0008g00890 | VIT_01s0011g03180 | VIT_01s0011g00930 |
| VIT_01s0026g02740 | VIT_04s0008g01180 | VIT_01s0011g03430 | VIT_01s0011g01000 |
| VIT_01s0113g00300 | VIT_04s0008g01200 | VIT_01s0011g03440 | VIT_01s0011g01070 |
| VIT_01s0127g00060 | VIT_04s0008g01300 | VIT_01s0011g03590 | VIT_01s0011g01100 |
| VIT_01s0127g00140 | VIT_04s0008g02180 | VIT_01s0011g03600 | VIT_01s0011g01110 |
| VIT_01s0127g00150 | VIT_04s0008g02280 | VIT_01s0011g03610 | VIT_01s0011g01120 |
| VIT_01s0127g00240 | VIT_04s0008g02890 | VIT_01s0011g03620 | VIT_01s0011g01130 |
| VIT_01s0127g00250 | VIT_04s0008g03600 | VIT_01s0011g03660 | VIT_01s0011g01210 |
| VIT_01s0127g00270 | VIT_04s0008g03800 | VIT_01s0011g03790 | VIT_01s0011g01290 |
| VIT_01s0127g00300 | VIT_04s0008g03840 | VIT_01s0011g03910 | VIT_01s0011g01320 |
| VIT_01s0127g00320 | VIT_04s0008g03920 | VIT_01s0011g03920 | VIT_01s0011g01360 |
| VIT_01s0127g00380 | VIT_04s0008g04010 | VIT_01s0011g04160 | VIT_01s0011g01390 |
| VIT_01s0127g00410 | VIT_04s0008g04150 | VIT_01s0011g04170 | VIT_01s0011g01400 |
| VIT_01s0127g00550 | VIT_04s0008g04280 | VIT_01s0011g04180 | VIT_01s0011g01420 |
| VIT_01s0137g00030 | VIT_04s0008g04320 | VIT_01s0011g04270 | VIT_01s0011g01470 |
| VIT_01s0137g00250 | VIT_04s0008g04330 | VIT_01s0011g04460 | VIT_01s0011g01510 |
| VIT_01s0137g00330 | VIT_04s0008g04360 | VIT_01s0011g04490 | VIT_01s0011g01620 |
| VIT_01s0137g00340 | VIT_04s0008g04370 | VIT_01s0011g04520 | VIT_01s0011g01670 |
| VIT_01s0137g00440 | VIT_04s0008g04720 | VIT_01s0011g04540 | VIT_01s0011g01680 |
| VIT_01s0137g00590 | VIT_04s0008g04780 | VIT_01s0011g04710 | VIT_01s0011g01690 |
| VIT_01s0137g00810 | VIT_04s0008g04910 | VIT_01s0011g04880 | VIT_01s0011g01870 |
| VIT_01s0146g00050 | VIT_04s0008g04970 | VIT_01s0011g04980 | VIT_01s0011g01910 |
| VIT_01s0146g00150 | VIT_04s0008g05030 | VIT_01s0011g05020 | VIT_01s0011g01940 |
| VIT_01s0146g00160 | VIT_04s0008g05090 | VIT_01s0011g05030 | VIT_01s0011g01980 |
| VIT_01s0146g00450 | VIT_04s0008g05470 | VIT_01s0011g05060 | VIT_01s0011g02010 |
| VIT_01s0146g00490 | VIT_04s0008g05690 | VIT_01s0011g05110 | VIT_01s0011g02020 |
| VIT_01s0146g00520 | VIT_04s0008g05880 | VIT_01s0011g05240 | VIT_01s0011g02040 |
| VIT_01s0150g00200 | VIT_04s0008g05930 | VIT_01s0011g05250 | VIT_01s0011g02060 |
| VIT_01s0150g00210 | VIT_04s0008g06080 | VIT_01s0011g05370 | VIT_01s0011g02130 |
| VIT_01s0150g00270 | VIT_04s0008g06700 | VIT_01s0011g05520 | VIT_01s0011g02230 |
| VIT_01s0150g00290 | VIT_04s0008g07020 | VIT_01s0011g05560 | VIT_01s0011g02280 |
| VIT_01s0150g00320 | VIT_04s0008g07310 | VIT_01s0011g05570 | VIT_01s0011g02400 |
| VIT_01s0150g00400 | VIT_04s0023g00050 | VIT_01s0011g05590 | VIT_01s0011g02480 |
| VIT_01s0150g00550 | VIT_04s0023g00370 | VIT_01s0011g05610 | VIT_01s0011g02510 |
| VIT_01s0150g00600 | VIT_04s0023g00440 | VIT_01s0011g05690 | VIT_01s0011g02700 |
| VIT_01s0182g00020 | VIT_04s0023g00560 | VIT_01s0011g05730 | VIT_01s0011g03070 |
| VIT_01s0244g00130 | VIT_04s0023g00590 | VIT_01s0011g05750 | VIT_01s0011g03190 |
| VIT_01s0244g00140 | VIT_04s0023g00600 | VIT_01s0011g05760 | VIT_01s0011g03220 |

VIT\_01s0244g00170 VIT\_04s0023g01390  
VIT\_02s0012g00030 VIT\_04s0023g01650  
VIT\_02s0012g00040 VIT\_04s0023g01720  
VIT\_02s0012g00060 VIT\_04s0023g01810  
VIT\_02s0012g00070 VIT\_04s0023g01820  
VIT\_02s0012g00090 VIT\_04s0023g01860  
VIT\_02s0012g00110 VIT\_04s0023g01920  
VIT\_02s0012g00380 VIT\_04s0023g02150  
VIT\_02s0012g00610 VIT\_04s0023g02270  
VIT\_02s0012g00630 VIT\_04s0023g02550  
VIT\_02s0012g00640 VIT\_04s0023g02600  
VIT\_02s0012g00840 VIT\_04s0023g02990  
VIT\_02s0012g00930 VIT\_04s0023g03010  
VIT\_02s0012g00990 VIT\_04s0023g03030  
VIT\_02s0012g01030 VIT\_04s0023g03190  
VIT\_02s0012g01090 VIT\_04s0023g03260  
VIT\_02s0012g01130 VIT\_04s0023g03280  
VIT\_02s0012g01300 VIT\_04s0023g03550  
VIT\_02s0012g01500 VIT\_04s0023g03590  
VIT\_02s0012g01530 VIT\_04s0023g03900  
VIT\_02s0012g01630 VIT\_04s0043g00270  
VIT\_02s0012g01810 VIT\_04s0043g00600  
VIT\_02s0012g01840 VIT\_04s0043g00700  
VIT\_02s0012g01880 VIT\_04s0043g00790  
VIT\_02s0012g01910 VIT\_04s0044g00030  
VIT\_02s0012g02090 VIT\_04s0044g01090  
VIT\_02s0012g02110 VIT\_04s0044g01150  
VIT\_02s0012g02270 VIT\_04s0044g01330  
VIT\_02s0012g02800 VIT\_04s0044g01570  
VIT\_02s0012g02970 VIT\_04s0044g01690  
VIT\_02s0012g03110 VIT\_04s0044g01720  
VIT\_02s0012g03170 VIT\_04s0044g01770  
VIT\_02s0012g03200 VIT\_04s0069g00030  
VIT\_02s0012g03210 VIT\_04s0069g00390  
VIT\_02s0025g00220 VIT\_04s0069g00870  
VIT\_02s0025g00230 VIT\_04s0069g00890  
VIT\_02s0025g00280 VIT\_04s0069g01070  
VIT\_02s0025g00390 VIT\_04s0079g00040  
VIT\_02s0025g00560 VIT\_04s0210g00220  
VIT\_02s0025g00680 VIT\_05s0020g00030  
VIT\_02s0025g00820 VIT\_05s0020g00270  
VIT\_02s0025g00840 VIT\_05s0020g00740  
VIT\_02s0025g00940 VIT\_05s0020g00760  
VIT\_02s0025g01070 VIT\_05s0020g00770  
VIT\_02s0025g01100 VIT\_05s0020g01090  
VIT\_02s0025g01140 VIT\_05s0020g01220  
VIT\_02s0025g01340 VIT\_05s0020g01320  
VIT\_02s0025g01400 VIT\_05s0020g01460  
VIT\_02s0025g01480 VIT\_05s0020g01550  
VIT\_02s0025g01620 VIT\_05s0020g01570  
VIT\_02s0025g01660 VIT\_05s0020g01580  
VIT\_02s0025g01680 VIT\_05s0020g01940  
VIT\_02s0025g01900 VIT\_05s0020g02160  
VIT\_02s0025g01940 VIT\_05s0020g02240  
VIT\_02s0025g01990 VIT\_05s0020g02310  
VIT\_02s0025g02050 VIT\_05s0020g02390  
VIT\_02s0025g02130 VIT\_05s0020g02560

VIT\_01s0011g05830 VIT\_01s0011g03230  
VIT\_01s0011g05840 VIT\_01s0011g03480  
VIT\_01s0011g05870 VIT\_01s0011g03580  
VIT\_01s0011g05880 VIT\_01s0011g03690  
VIT\_01s0011g06000 VIT\_01s0011g03700  
VIT\_01s0011g06060 VIT\_01s0011g03710  
VIT\_01s0011g06130 VIT\_01s0011g03980  
VIT\_01s0011g06180 VIT\_01s0011g03990  
VIT\_01s0011g06190 VIT\_01s0011g04000  
VIT\_01s0011g06210 VIT\_01s0011g04010  
VIT\_01s0011g06250 VIT\_01s0011g04090  
VIT\_01s0011g06280 VIT\_01s0011g04190  
VIT\_01s0011g06410 VIT\_01s0011g04280  
VIT\_01s0011g06430 VIT\_01s0011g04290  
VIT\_01s0011g06490 VIT\_01s0011g04300  
VIT\_01s0011g06500 VIT\_01s0011g04320  
VIT\_01s0011g06540 VIT\_01s0011g04330  
VIT\_01s0011g06550 VIT\_01s0011g04380  
VIT\_01s0011g06560 VIT\_01s0011g04410  
VIT\_01s0011g06580 VIT\_01s0011g04550  
VIT\_01s0011g06600 VIT\_01s0011g04610  
VIT\_01s0026g00060 VIT\_01s0011g04700  
VIT\_01s0026g00140 VIT\_01s0011g04780  
VIT\_01s0026g00200 VIT\_01s0011g04810  
VIT\_01s0026g00260 VIT\_01s0011g04820  
VIT\_01s0026g00320 VIT\_01s0011g04840  
VIT\_01s0026g00350 VIT\_01s0011g05040  
VIT\_01s0026g00400 VIT\_01s0011g05050  
VIT\_01s0026g00420 VIT\_01s0011g05170  
VIT\_01s0026g00450 VIT\_01s0011g05180  
VIT\_01s0026g00500 VIT\_01s0011g05190  
VIT\_01s0026g00520 VIT\_01s0011g05210  
VIT\_01s0026g00600 VIT\_01s0011g05320  
VIT\_01s0026g00630 VIT\_01s0011g05380  
VIT\_01s0026g00710 VIT\_01s0011g05430  
VIT\_01s0026g00750 VIT\_01s0011g05580  
VIT\_01s0026g00840 VIT\_01s0011g05650  
VIT\_01s0026g00940 VIT\_01s0011g05680  
VIT\_01s0026g00990 VIT\_01s0011g05740  
VIT\_01s0026g01080 VIT\_01s0011g05810  
VIT\_01s0026g01120 VIT\_01s0011g05890  
VIT\_01s0026g01140 VIT\_01s0011g05900  
VIT\_01s0026g01190 VIT\_01s0011g05930  
VIT\_01s0026g01340 VIT\_01s0011g05960  
VIT\_01s0026g01410 VIT\_01s0011g05970  
VIT\_01s0026g01480 VIT\_01s0011g06020  
VIT\_01s0026g01490 VIT\_01s0011g06150  
VIT\_01s0026g01650 VIT\_01s0011g06320  
VIT\_01s0026g01860 VIT\_01s0011g06370  
VIT\_01s0026g01900 VIT\_01s0011g06590  
VIT\_01s0026g02030 VIT\_01s0011g06620  
VIT\_01s0026g02140 VIT\_01s0026g00090  
VIT\_01s0026g02170 VIT\_01s0026g00100  
VIT\_01s0026g02190 VIT\_01s0026g00130  
VIT\_01s0026g02260 VIT\_01s0026g00160  
VIT\_01s0026g02350 VIT\_01s0026g00170  
VIT\_01s0026g02370 VIT\_01s0026g00190

|                   |                   |                   |                   |
|-------------------|-------------------|-------------------|-------------------|
| VIT_02s0025g02140 | VIT_05s0020g02570 | VIT_01s0026g02390 | VIT_01s0026g00270 |
| VIT_02s0025g02170 | VIT_05s0020g02620 | VIT_01s0026g02500 | VIT_01s0026g00280 |
| VIT_02s0025g02200 | VIT_05s0020g02630 | VIT_01s0026g02520 | VIT_01s0026g00540 |
| VIT_02s0025g02330 | VIT_05s0020g02680 | VIT_01s0026g02550 | VIT_01s0026g00620 |
| VIT_02s0025g02350 | VIT_05s0020g02870 | VIT_01s0026g02580 | VIT_01s0026g00650 |
| VIT_02s0025g02370 | VIT_05s0020g02940 | VIT_01s0026g02600 | VIT_01s0026g00670 |
| VIT_02s0025g02560 | VIT_05s0020g03210 | VIT_01s0026g02620 | VIT_01s0026g00720 |
| VIT_02s0025g02590 | VIT_05s0020g03290 | VIT_01s0127g00010 | VIT_01s0026g00920 |
| VIT_02s0025g02890 | VIT_05s0020g03300 | VIT_01s0127g00050 | VIT_01s0026g00930 |
| VIT_02s0025g03170 | VIT_05s0020g03380 | VIT_01s0127g00070 | VIT_01s0026g01000 |
| VIT_02s0025g03260 | VIT_05s0020g03660 | VIT_01s0127g00110 | VIT_01s0026g01280 |
| VIT_02s0025g03370 | VIT_05s0020g03790 | VIT_01s0127g00130 | VIT_01s0026g01290 |
| VIT_02s0025g03380 | VIT_05s0020g03910 | VIT_01s0127g00260 | VIT_01s0026g01380 |
| VIT_02s0025g03490 | VIT_05s0020g03920 | VIT_01s0127g00440 | VIT_01s0026g01400 |
| VIT_02s0025g03550 | VIT_05s0020g03970 | VIT_01s0127g00750 | VIT_01s0026g01440 |
| VIT_02s0025g03590 | VIT_05s0020g04100 | VIT_01s0127g00810 | VIT_01s0026g01560 |
| VIT_02s0025g03810 | VIT_05s0020g04270 | VIT_01s0137g00010 | VIT_01s0026g01660 |
| VIT_02s0025g03850 | VIT_05s0020g04410 | VIT_01s0137g00020 | VIT_01s0026g01740 |
| VIT_02s0025g03910 | VIT_05s0020g04520 | VIT_01s0137g00120 | VIT_01s0026g01820 |
| VIT_02s0025g03990 | VIT_05s0020g04530 | VIT_01s0137g00290 | VIT_01s0026g02430 |
| VIT_02s0025g04060 | VIT_05s0020g04860 | VIT_01s0137g00420 | VIT_01s0026g02490 |
| VIT_02s0025g04180 | VIT_05s0029g00010 | VIT_01s0137g00460 | VIT_01s0026g02510 |
| VIT_02s0025g04430 | VIT_05s0029g00060 | VIT_01s0137g00510 | VIT_01s0026g02540 |
| VIT_02s0025g04460 | VIT_05s0029g00120 | VIT_01s0137g00580 | VIT_01s0026g02640 |
| VIT_02s0025g04470 | VIT_05s0029g00200 | VIT_01s0146g00020 | VIT_01s0026g02680 |
| VIT_02s0025g04480 | VIT_05s0029g00290 | VIT_01s0146g00060 | VIT_01s0026g02700 |
| VIT_02s0025g04980 | VIT_05s0029g00300 | VIT_01s0146g00100 | VIT_01s0026g02710 |
| VIT_02s0033g00030 | VIT_05s0029g00730 | VIT_01s0146g00120 | VIT_01s0026g02740 |
| VIT_02s0033g00060 | VIT_05s0029g00860 | VIT_01s0146g00300 | VIT_01s0113g00560 |
| VIT_02s0033g00090 | VIT_05s0029g01100 | VIT_01s0146g00310 | VIT_01s0127g00060 |
| VIT_02s0033g00310 | VIT_05s0029g01370 | VIT_01s0146g00320 | VIT_01s0127g00140 |
| VIT_02s0033g00420 | VIT_05s0029g01380 | VIT_01s0146g00340 | VIT_01s0127g00160 |
| VIT_02s0033g00520 | VIT_05s0029g01420 | VIT_01s0146g00380 | VIT_01s0127g00170 |
| VIT_02s0033g00540 | VIT_05s0029g01450 | VIT_01s0146g00510 | VIT_01s0127g00190 |
| VIT_02s0033g00960 | VIT_05s0029g01540 | VIT_01s0150g00100 | VIT_01s0127g00250 |
| VIT_02s0033g01190 | VIT_05s0049g00050 | VIT_01s0150g00140 | VIT_01s0127g00300 |
| VIT_02s0033g01240 | VIT_05s0049g00140 | VIT_01s0150g00170 | VIT_01s0127g00320 |
| VIT_02s0033g01270 | VIT_05s0049g00150 | VIT_01s0150g00310 | VIT_01s0127g00380 |
| VIT_02s0033g01300 | VIT_05s0049g00190 | VIT_01s0150g00510 | VIT_01s0127g00410 |
| VIT_02s0033g01360 | VIT_05s0049g00270 | VIT_01s0150g00520 | VIT_01s0127g00550 |
| VIT_02s0087g00080 | VIT_05s0049g00280 | VIT_01s0150g00570 | VIT_01s0127g00650 |
| VIT_02s0087g00190 | VIT_05s0049g00290 | VIT_02s0012g00180 | VIT_01s0127g00690 |
| VIT_02s0087g00470 | VIT_05s0049g00390 | VIT_02s0012g00280 | VIT_01s0127g00740 |
| VIT_02s0087g00650 | VIT_05s0049g00540 | VIT_02s0012g00350 | VIT_01s0127g00910 |
| VIT_02s0087g00740 | VIT_05s0049g01140 | VIT_02s0012g00550 | VIT_01s0137g00030 |
| VIT_02s0087g00890 | VIT_05s0049g01170 | VIT_02s0012g00590 | VIT_01s0137g00260 |
| VIT_02s0109g00250 | VIT_05s0049g01200 | VIT_02s0012g00760 | VIT_01s0137g00430 |
| VIT_02s0154g00050 | VIT_05s0049g01220 | VIT_02s0012g00860 | VIT_01s0137g00440 |
| VIT_02s0154g00230 | VIT_05s0049g01490 | VIT_02s0012g00900 | VIT_01s0137g00450 |
| VIT_02s0154g00470 | VIT_05s0049g01660 | VIT_02s0012g00910 | VIT_01s0137g00530 |
| VIT_02s0154g00480 | VIT_05s0049g01750 | VIT_02s0012g01040 | VIT_01s0137g00660 |
| VIT_02s0154g00490 | VIT_05s0049g01760 | VIT_02s0012g01120 | VIT_01s0137g00710 |
| VIT_02s0154g00560 | VIT_05s0049g02250 | VIT_02s0012g01250 | VIT_01s0137g00780 |
| VIT_02s0154g00600 | VIT_05s0049g02320 | VIT_02s0012g01260 | VIT_01s0137g00810 |
| VIT_02s0234g00130 | VIT_05s0051g00010 | VIT_02s0012g01270 | VIT_01s0146g00440 |
| VIT_02s0241g00080 | VIT_05s0051g00070 | VIT_02s0012g01570 | VIT_01s0146g00450 |
| VIT_02s0241g00110 | VIT_05s0051g00290 | VIT_02s0012g01620 | VIT_01s0146g00490 |

|                   |                   |                   |                   |
|-------------------|-------------------|-------------------|-------------------|
| VIT_03s0017g00130 | VIT_05s0051g00310 | VIT_02s0012g01680 | VIT_01s0146g00520 |
| VIT_03s0017g00140 | VIT_05s0062g00130 | VIT_02s0012g01920 | VIT_01s0146g00530 |
| VIT_03s0017g00150 | VIT_05s0062g00210 | VIT_02s0012g01930 | VIT_01s0150g00130 |
| VIT_03s0017g00220 | VIT_05s0062g00640 | VIT_02s0012g01940 | VIT_01s0150g00200 |
| VIT_03s0017g00270 | VIT_05s0062g00830 | VIT_02s0012g02120 | VIT_01s0150g00230 |
| VIT_03s0017g00550 | VIT_05s0062g00850 | VIT_02s0012g02180 | VIT_01s0150g00240 |
| VIT_03s0017g00650 | VIT_05s0062g01080 | VIT_02s0012g02190 | VIT_01s0150g00270 |
| VIT_03s0017g01000 | VIT_05s0062g01180 | VIT_02s0012g02420 | VIT_01s0150g00320 |
| VIT_03s0017g01370 | VIT_05s0062g01250 | VIT_02s0012g02430 | VIT_01s0150g00380 |
| VIT_03s0017g01480 | VIT_05s0077g00140 | VIT_02s0012g02450 | VIT_01s0150g00540 |
| VIT_03s0017g01660 | VIT_05s0077g00190 | VIT_02s0012g02640 | VIT_01s0150g00640 |
| VIT_03s0017g01800 | VIT_05s0077g00240 | VIT_02s0012g02660 | VIT_01s0182g00020 |
| VIT_03s0017g01830 | VIT_05s0077g00280 | VIT_02s0012g02670 | VIT_01s0182g00030 |
| VIT_03s0017g01980 | VIT_05s0077g00400 | VIT_02s0012g02720 | VIT_01s0244g00110 |
| VIT_03s0017g02180 | VIT_05s0077g00610 | VIT_02s0012g02790 | VIT_01s0244g00130 |
| VIT_03s0017g02290 | VIT_05s0077g00940 | VIT_02s0012g02820 | VIT_01s0244g00170 |
| VIT_03s0017g02330 | VIT_05s0077g01260 | VIT_02s0012g03040 | VIT_02s0012g00030 |
| VIT_03s0038g00120 | VIT_05s0077g01270 | VIT_02s0012g03050 | VIT_02s0012g00040 |
| VIT_03s0038g00160 | VIT_05s0077g01540 | VIT_02s0012g03240 | VIT_02s0012g00060 |
| VIT_03s0038g00170 | VIT_05s0077g01550 | VIT_02s0025g00070 | VIT_02s0012g00070 |
| VIT_03s0038g00210 | VIT_05s0077g01700 | VIT_02s0025g00090 | VIT_02s0012g00090 |
| VIT_03s0038g00300 | VIT_05s0077g02310 | VIT_02s0025g00100 | VIT_02s0012g00370 |
| VIT_03s0038g00380 | VIT_05s0077g02320 | VIT_02s0025g00120 | VIT_02s0012g00380 |
| VIT_03s0038g00400 | VIT_05s0094g00400 | VIT_02s0025g00130 | VIT_02s0012g00390 |
| VIT_03s0038g00730 | VIT_05s0094g00710 | VIT_02s0025g00140 | VIT_02s0012g00400 |
| VIT_03s0038g00790 | VIT_05s0094g00750 | VIT_02s0025g00190 | VIT_02s0012g00430 |
| VIT_03s0038g00800 | VIT_05s0094g00770 | VIT_02s0025g00200 | VIT_02s0012g00440 |
| VIT_03s0038g00820 | VIT_05s0094g00820 | VIT_02s0025g00300 | VIT_02s0012g00610 |
| VIT_03s0038g00910 | VIT_05s0094g00890 | VIT_02s0025g00310 | VIT_02s0012g00770 |
| VIT_03s0038g01340 | VIT_05s0094g00940 | VIT_02s0025g00420 | VIT_02s0012g00800 |
| VIT_03s0038g01370 | VIT_05s0094g01120 | VIT_02s0025g00520 | VIT_02s0012g00880 |
| VIT_03s0038g01460 | VIT_05s0094g01260 | VIT_02s0025g00550 | VIT_02s0012g00930 |
| VIT_03s0038g01490 | VIT_05s0094g01380 | VIT_02s0025g00640 | VIT_02s0012g01010 |
| VIT_03s0038g01760 | VIT_05s0094g01390 | VIT_02s0025g00650 | VIT_02s0012g01030 |
| VIT_03s0038g01780 | VIT_05s0094g01560 | VIT_02s0025g00690 | VIT_02s0012g01070 |
| VIT_03s0038g01820 | VIT_05s0094g01620 | VIT_02s0025g00760 | VIT_02s0012g01130 |
| VIT_03s0038g01960 | VIT_05s0102g00250 | VIT_02s0025g00850 | VIT_02s0012g01300 |
| VIT_03s0038g02070 | VIT_05s0102g00490 | VIT_02s0025g00860 | VIT_02s0012g01340 |
| VIT_03s0038g02080 | VIT_05s0102g00750 | VIT_02s0025g00930 | VIT_02s0012g01420 |
| VIT_03s0038g02090 | VIT_05s0102g01180 | VIT_02s0025g00950 | VIT_02s0012g01500 |
| VIT_03s0038g02110 | VIT_05s0124g00010 | VIT_02s0025g00970 | VIT_02s0012g01550 |
| VIT_03s0038g02210 | VIT_05s0124g00240 | VIT_02s0025g00980 | VIT_02s0012g01590 |
| VIT_03s0038g02290 | VIT_05s0136g00140 | VIT_02s0025g00990 | VIT_02s0012g01630 |
| VIT_03s0038g02310 | VIT_06s0004g00120 | VIT_02s0025g01130 | VIT_02s0012g01640 |
| VIT_03s0038g02370 | VIT_06s0004g00260 | VIT_02s0025g01250 | VIT_02s0012g01650 |
| VIT_03s0038g02380 | VIT_06s0004g00470 | VIT_02s0025g01320 | VIT_02s0012g01760 |
| VIT_03s0038g02430 | VIT_06s0004g00620 | VIT_02s0025g01350 | VIT_02s0012g01810 |
| VIT_03s0038g02470 | VIT_06s0004g00820 | VIT_02s0025g01360 | VIT_02s0012g01840 |
| VIT_03s0038g02520 | VIT_06s0004g00930 | VIT_02s0025g01390 | VIT_02s0012g01880 |
| VIT_03s0038g02560 | VIT_06s0004g00950 | VIT_02s0025g01410 | VIT_02s0012g01980 |
| VIT_03s0038g02610 | VIT_06s0004g01020 | VIT_02s0025g01430 | VIT_02s0012g02050 |
| VIT_03s0038g02660 | VIT_06s0004g01210 | VIT_02s0025g01450 | VIT_02s0012g02240 |
| VIT_03s0038g02810 | VIT_06s0004g01260 | VIT_02s0025g01490 | VIT_02s0012g02270 |
| VIT_03s0038g02850 | VIT_06s0004g01300 | VIT_02s0025g01500 | VIT_02s0012g02340 |
| VIT_03s0038g02870 | VIT_06s0004g01360 | VIT_02s0025g01570 | VIT_02s0012g02700 |
| VIT_03s0038g03090 | VIT_06s0004g01420 | VIT_02s0025g01590 | VIT_02s0012g02800 |
| VIT_03s0038g03250 | VIT_06s0004g02140 | VIT_02s0025g01780 | VIT_02s0012g03060 |

|                   |                   |                   |                   |
|-------------------|-------------------|-------------------|-------------------|
| VIT_03s0038g03400 | VIT_06s0004g02280 | VIT_02s0025g01790 | VIT_02s0012g03110 |
| VIT_03s0038g03560 | VIT_06s0004g02540 | VIT_02s0025g01880 | VIT_02s0012g03130 |
| VIT_03s0038g03640 | VIT_06s0004g02600 | VIT_02s0025g02020 | VIT_02s0012g03180 |
| VIT_03s0038g03740 | VIT_06s0004g02720 | VIT_02s0025g02090 | VIT_02s0012g03190 |
| VIT_03s0038g03800 | VIT_06s0004g02900 | VIT_02s0025g02210 | VIT_02s0012g03200 |
| VIT_03s0038g03810 | VIT_06s0004g02930 | VIT_02s0025g02250 | VIT_02s0025g00220 |
| VIT_03s0038g03900 | VIT_06s0004g02990 | VIT_02s0025g02270 | VIT_02s0025g00230 |
| VIT_03s0038g04040 | VIT_06s0004g03000 | VIT_02s0025g02310 | VIT_02s0025g00330 |
| VIT_03s0038g04180 | VIT_06s0004g03030 | VIT_02s0025g02360 | VIT_02s0025g00480 |
| VIT_03s0038g04190 | VIT_06s0004g03100 | VIT_02s0025g02400 | VIT_02s0025g00500 |
| VIT_03s0038g04290 | VIT_06s0004g03200 | VIT_02s0025g02460 | VIT_02s0025g00530 |
| VIT_03s0038g04390 | VIT_06s0004g03520 | VIT_02s0025g02520 | VIT_02s0025g00560 |
| VIT_03s0038g04430 | VIT_06s0004g03580 | VIT_02s0025g02530 | VIT_02s0025g00680 |
| VIT_03s0038g04610 | VIT_06s0004g03650 | VIT_02s0025g02540 | VIT_02s0025g00770 |
| VIT_03s0038g04690 | VIT_06s0004g03660 | VIT_02s0025g02710 | VIT_02s0025g00810 |
| VIT_03s0063g00080 | VIT_06s0004g03800 | VIT_02s0025g02760 | VIT_02s0025g00830 |
| VIT_03s0063g00270 | VIT_06s0004g03930 | VIT_02s0025g02780 | VIT_02s0025g00840 |
| VIT_03s0063g00290 | VIT_06s0004g03970 | VIT_02s0025g02790 | VIT_02s0025g00880 |
| VIT_03s0063g00300 | VIT_06s0004g03990 | VIT_02s0025g02820 | VIT_02s0025g00890 |
| VIT_03s0063g00330 | VIT_06s0004g04350 | VIT_02s0025g02960 | VIT_02s0025g00900 |
| VIT_03s0063g00440 | VIT_06s0004g04360 | VIT_02s0025g02970 | VIT_02s0025g00940 |
| VIT_03s0063g00540 | VIT_06s0004g04570 | VIT_02s0025g03050 | VIT_02s0025g01260 |
| VIT_03s0063g00630 | VIT_06s0004g04980 | VIT_02s0025g03060 | VIT_02s0025g01340 |
| VIT_03s0063g00740 | VIT_06s0004g05030 | VIT_02s0025g03330 | VIT_02s0025g01400 |
| VIT_03s0063g00850 | VIT_06s0004g05060 | VIT_02s0025g03420 | VIT_02s0025g01470 |
| VIT_03s0063g00900 | VIT_06s0004g05100 | VIT_02s0025g03460 | VIT_02s0025g01480 |
| VIT_03s0063g00920 | VIT_06s0004g05140 | VIT_02s0025g03470 | VIT_02s0025g01520 |
| VIT_03s0063g01080 | VIT_06s0004g05820 | VIT_02s0025g03540 | VIT_02s0025g01620 |
| VIT_03s0063g01340 | VIT_06s0004g06120 | VIT_02s0025g03640 | VIT_02s0025g01640 |
| VIT_03s0063g01360 | VIT_06s0004g06640 | VIT_02s0025g03650 | VIT_02s0025g01700 |
| VIT_03s0063g01380 | VIT_06s0004g06650 | VIT_02s0025g03690 | VIT_02s0025g01830 |
| VIT_03s0063g01420 | VIT_06s0004g06970 | VIT_02s0025g03710 | VIT_02s0025g01840 |
| VIT_03s0063g01430 | VIT_06s0004g07010 | VIT_02s0025g03740 | VIT_02s0025g01940 |
| VIT_03s0063g01500 | VIT_06s0004g07390 | VIT_02s0025g03960 | VIT_02s0025g01990 |
| VIT_03s0063g01790 | VIT_06s0004g07990 | VIT_02s0025g03970 | VIT_02s0025g02030 |
| VIT_03s0063g01990 | VIT_06s0004g08180 | VIT_02s0025g04120 | VIT_02s0025g02040 |
| VIT_03s0063g02010 | VIT_06s0004g08270 | VIT_02s0025g04350 | VIT_02s0025g02050 |
| VIT_03s0063g02080 | VIT_06s0004g08350 | VIT_02s0025g04530 | VIT_02s0025g02130 |
| VIT_03s0063g02100 | VIT_06s0004g08360 | VIT_02s0025g04570 | VIT_02s0025g02330 |
| VIT_03s0063g02460 | VIT_06s0009g00250 | VIT_02s0025g04580 | VIT_02s0025g02370 |
| VIT_03s0063g02470 | VIT_06s0009g01050 | VIT_02s0025g04590 | VIT_02s0025g02490 |
| VIT_03s0063g02520 | VIT_06s0009g01060 | VIT_02s0025g04610 | VIT_02s0025g02560 |
| VIT_03s0063g02540 | VIT_06s0009g01130 | VIT_02s0025g04620 | VIT_02s0025g02890 |
| VIT_03s0063g02590 | VIT_06s0009g01140 | VIT_02s0025g04630 | VIT_02s0025g03100 |
| VIT_03s0063g02640 | VIT_06s0009g01460 | VIT_02s0025g04650 | VIT_02s0025g03110 |
| VIT_03s0063g02700 | VIT_06s0009g01610 | VIT_02s0025g04660 | VIT_02s0025g03170 |
| VIT_03s0088g00310 | VIT_06s0009g01710 | VIT_02s0025g04670 | VIT_02s0025g03220 |
| VIT_03s0088g00320 | VIT_06s0009g02010 | VIT_02s0025g04720 | VIT_02s0025g03290 |
| VIT_03s0088g00570 | VIT_06s0009g02120 | VIT_02s0025g04750 | VIT_02s0025g03300 |
| VIT_03s0088g00630 | VIT_06s0009g02340 | VIT_02s0025g04930 | VIT_02s0025g03370 |
| VIT_03s0088g00950 | VIT_06s0009g02380 | VIT_02s0025g05060 | VIT_02s0025g03380 |
| VIT_03s0088g00990 | VIT_06s0009g02510 | VIT_02s0025g05070 | VIT_02s0025g03410 |
| VIT_03s0088g01070 | VIT_06s0009g02670 | VIT_02s0025g05090 | VIT_02s0025g03630 |
| VIT_03s0088g01130 | VIT_06s0009g03200 | VIT_02s0025g05170 | VIT_02s0025g03730 |
| VIT_03s0088g01200 | VIT_06s0009g03270 | VIT_02s0033g00500 | VIT_02s0025g03810 |
| VIT_03s0088g01220 | VIT_06s0009g03520 | VIT_02s0033g00640 | VIT_02s0025g03820 |
| VIT_03s0091g00050 | VIT_06s0009g03750 | VIT_02s0033g00720 | VIT_02s0025g03850 |

|                   |                   |                   |                   |
|-------------------|-------------------|-------------------|-------------------|
| VIT_03s0091g00290 | VIT_06s0009g03810 | VIT_02s0033g00930 | VIT_02s0025g03910 |
| VIT_03s0091g00320 | VIT_06s0061g00030 | VIT_02s0033g00970 | VIT_02s0025g03990 |
| VIT_03s0091g00370 | VIT_06s0061g00100 | VIT_02s0033g01010 | VIT_02s0025g04030 |
| VIT_03s0091g00380 | VIT_06s0061g00180 | VIT_02s0033g01100 | VIT_02s0025g04040 |
| VIT_03s0091g00480 | VIT_06s0061g00380 | VIT_02s0033g01110 | VIT_02s0025g04060 |
| VIT_03s0091g00590 | VIT_06s0061g00690 | VIT_02s0033g01260 | VIT_02s0025g04180 |
| VIT_03s0091g00670 | VIT_06s0061g00760 | VIT_02s0033g01340 | VIT_02s0025g04330 |
| VIT_03s0091g00740 | VIT_06s0061g00800 | VIT_02s0033g01350 | VIT_02s0025g04340 |
| VIT_03s0091g00810 | VIT_06s0061g00900 | VIT_02s0033g01410 | VIT_02s0025g04430 |
| VIT_03s0091g00820 | VIT_06s0061g00940 | VIT_02s0087g00070 | VIT_02s0025g04440 |
| VIT_03s0091g01220 | VIT_06s0061g01050 | VIT_02s0087g00250 | VIT_02s0025g04450 |
| VIT_03s0097g00250 | VIT_06s0061g01130 | VIT_02s0087g00360 | VIT_02s0025g04460 |
| VIT_03s0097g00530 | VIT_06s0061g01340 | VIT_02s0087g00380 | VIT_02s0025g04470 |
| VIT_03s0097g00610 | VIT_06s0061g01470 | VIT_02s0087g00430 | VIT_02s0025g04480 |
| VIT_03s0110g00280 | VIT_06s0061g01600 | VIT_02s0087g00440 | VIT_02s0025g04510 |
| VIT_03s0110g00330 | VIT_06s0061g01610 | VIT_02s0087g00460 | VIT_02s0025g04700 |
| VIT_03s0132g00020 | VIT_06s0080g00130 | VIT_02s0109g00360 | VIT_02s0025g04760 |
| VIT_03s0132g00050 | VIT_06s0080g00270 | VIT_02s0154g00070 | VIT_02s0025g04840 |
| VIT_03s0132g00210 | VIT_06s0080g00470 | VIT_02s0154g00110 | VIT_02s0025g05010 |
| VIT_03s0132g00230 | VIT_06s0080g00540 | VIT_02s0154g00330 | VIT_02s0025g05150 |
| VIT_03s0180g00230 | VIT_06s0080g00860 | VIT_02s0154g00350 | VIT_02s0025g05160 |
| VIT_03s0180g00250 | VIT_06s0080g01050 | VIT_02s0154g00400 | VIT_02s0033g00030 |
| VIT_03s0180g00260 | VIT_06s0080g01080 | VIT_02s0154g00440 | VIT_02s0033g00060 |
| VIT_03s0180g00290 | VIT_06s0080g01100 | VIT_02s0154g00530 | VIT_02s0033g00130 |
| VIT_04s0008g00030 | VIT_07s0005g00230 | VIT_02s0234g00020 | VIT_02s0033g00180 |
| VIT_04s0008g00480 | VIT_07s0005g00390 | VIT_02s0234g00030 | VIT_02s0033g00520 |
| VIT_04s0008g00510 | VIT_07s0005g00470 | VIT_02s0234g00050 | VIT_02s0033g00540 |
| VIT_04s0008g00540 | VIT_07s0005g00900 | VIT_02s0234g00100 | VIT_02s0033g00550 |
| VIT_04s0008g00610 | VIT_07s0005g00950 | VIT_02s0236g00030 | VIT_02s0033g00770 |
| VIT_04s0008g00690 | VIT_07s0005g01490 | VIT_02s0241g00020 | VIT_02s0033g00850 |
| VIT_04s0008g00950 | VIT_07s0005g01600 | VIT_02s0241g00050 | VIT_02s0033g00880 |
| VIT_04s0008g00960 | VIT_07s0005g01800 | VIT_02s0488g00050 | VIT_02s0033g00960 |
| VIT_04s0008g01000 | VIT_07s0005g01830 | VIT_03s0017g00300 | VIT_02s0033g01190 |
| VIT_04s0008g01010 | VIT_07s0005g01850 | VIT_03s0017g00330 | VIT_02s0033g01240 |
| VIT_04s0008g01060 | VIT_07s0005g02610 | VIT_03s0017g00360 | VIT_02s0033g01270 |
| VIT_04s0008g01110 | VIT_07s0005g02810 | VIT_03s0017g00450 | VIT_02s0033g01300 |
| VIT_04s0008g01130 | VIT_07s0005g03080 | VIT_03s0017g00540 | VIT_02s0033g01380 |
| VIT_04s0008g01330 | VIT_07s0005g03200 | VIT_03s0017g00660 | VIT_02s0087g00080 |
| VIT_04s0008g01370 | VIT_07s0005g03310 | VIT_03s0017g01010 | VIT_02s0087g00130 |
| VIT_04s0008g01480 | VIT_07s0005g03380 | VIT_03s0017g01140 | VIT_02s0087g00190 |
| VIT_04s0008g01490 | VIT_07s0005g03490 | VIT_03s0017g01220 | VIT_02s0087g00470 |
| VIT_04s0008g01500 | VIT_07s0005g03620 | VIT_03s0017g01280 | VIT_02s0087g00500 |
| VIT_04s0008g01510 | VIT_07s0005g03680 | VIT_03s0017g01360 | VIT_02s0087g00510 |
| VIT_04s0008g01520 | VIT_07s0005g03730 | VIT_03s0017g01780 | VIT_02s0087g00680 |
| VIT_04s0008g01530 | VIT_07s0005g03790 | VIT_03s0017g02110 | VIT_02s0087g00750 |
| VIT_04s0008g01540 | VIT_07s0005g03960 | VIT_03s0017g02120 | VIT_02s0087g00790 |
| VIT_04s0008g01550 | VIT_07s0005g03980 | VIT_03s0017g02140 | VIT_02s0087g00910 |
| VIT_04s0008g01560 | VIT_07s0005g04300 | VIT_03s0017g02260 | VIT_02s0087g00920 |
| VIT_04s0008g01570 | VIT_07s0005g04330 | VIT_03s0038g00050 | VIT_02s0087g00950 |
| VIT_04s0008g01580 | VIT_07s0005g04400 | VIT_03s0038g00480 | VIT_02s0109g00310 |
| VIT_04s0008g01590 | VIT_07s0005g04900 | VIT_03s0038g00630 | VIT_02s0109g00370 |
| VIT_04s0008g01680 | VIT_07s0005g04950 | VIT_03s0038g00700 | VIT_02s0109g00420 |
| VIT_04s0008g01750 | VIT_07s0005g05040 | VIT_03s0038g00740 | VIT_02s0154g00050 |
| VIT_04s0008g01760 | VIT_07s0005g05100 | VIT_03s0038g00880 | VIT_02s0154g00060 |
| VIT_04s0008g01790 | VIT_07s0005g05330 | VIT_03s0038g00890 | VIT_02s0154g00260 |
| VIT_04s0008g01900 | VIT_07s0005g05840 | VIT_03s0038g00970 | VIT_02s0154g00470 |
| VIT_04s0008g01940 | VIT_07s0005g05960 | VIT_03s0038g01050 | VIT_02s0154g00490 |

|                   |                   |                   |                   |
|-------------------|-------------------|-------------------|-------------------|
| VIT_04s0008g02000 | VIT_07s0005g06380 | VIT_03s0038g01080 | VIT_02s0154g00520 |
| VIT_04s0008g02050 | VIT_07s0005g06640 | VIT_03s0038g01090 | VIT_02s0154g00560 |
| VIT_04s0008g02090 | VIT_07s0005g06660 | VIT_03s0038g01100 | VIT_02s0234g00130 |
| VIT_04s0008g02120 | VIT_07s0005g06690 | VIT_03s0038g01110 | VIT_02s0236g00040 |
| VIT_04s0008g02140 | VIT_07s0031g00760 | VIT_03s0038g01120 | VIT_02s0241g00010 |
| VIT_04s0008g02170 | VIT_07s0031g00820 | VIT_03s0038g01130 | VIT_02s0241g00080 |
| VIT_04s0008g02220 | VIT_07s0031g01290 | VIT_03s0038g01150 | VIT_02s0241g00110 |
| VIT_04s0008g02270 | VIT_07s0031g01370 | VIT_03s0038g01160 | VIT_03s0017g00130 |
| VIT_04s0008g02300 | VIT_07s0031g01380 | VIT_03s0038g01230 | VIT_03s0017g00220 |
| VIT_04s0008g02450 | VIT_07s0031g01420 | VIT_03s0038g01410 | VIT_03s0017g00270 |
| VIT_04s0008g02490 | VIT_07s0031g01480 | VIT_03s0038g01480 | VIT_03s0017g00290 |
| VIT_04s0008g02600 | VIT_07s0031g01550 | VIT_03s0038g01550 | VIT_03s0017g00410 |
| VIT_04s0008g02620 | VIT_07s0031g01560 | VIT_03s0038g01660 | VIT_03s0017g00530 |
| VIT_04s0008g02650 | VIT_07s0031g01570 | VIT_03s0038g02130 | VIT_03s0017g00550 |
| VIT_04s0008g02660 | VIT_07s0031g01650 | VIT_03s0038g02160 | VIT_03s0017g00560 |
| VIT_04s0008g02720 | VIT_07s0031g01730 | VIT_03s0038g02300 | VIT_03s0017g00610 |
| VIT_04s0008g02830 | VIT_07s0031g01750 | VIT_03s0038g02330 | VIT_03s0017g00940 |
| VIT_04s0008g02950 | VIT_07s0031g01860 | VIT_03s0038g02590 | VIT_03s0017g01000 |
| VIT_04s0008g02980 | VIT_07s0031g02060 | VIT_03s0038g02620 | VIT_03s0017g01040 |
| VIT_04s0008g03000 | VIT_07s0031g02090 | VIT_03s0038g02630 | VIT_03s0017g01050 |
| VIT_04s0008g03030 | VIT_07s0031g02100 | VIT_03s0038g02760 | VIT_03s0017g01210 |
| VIT_04s0008g03040 | VIT_07s0031g02560 | VIT_03s0038g02780 | VIT_03s0017g01370 |
| VIT_04s0008g03150 | VIT_07s0031g02630 | VIT_03s0038g02900 | VIT_03s0017g01410 |
| VIT_04s0008g03320 | VIT_07s0031g02690 | VIT_03s0038g02940 | VIT_03s0017g01460 |
| VIT_04s0008g03380 | VIT_07s0031g02750 | VIT_03s0038g03030 | VIT_03s0017g01480 |
| VIT_04s0008g03430 | VIT_07s0031g02780 | VIT_03s0038g03110 | VIT_03s0017g01660 |
| VIT_04s0008g03670 | VIT_07s0031g02820 | VIT_03s0038g03120 | VIT_03s0017g01710 |
| VIT_04s0008g03690 | VIT_07s0031g02870 | VIT_03s0038g03230 | VIT_03s0017g01720 |
| VIT_04s0008g03720 | VIT_07s0031g02960 | VIT_03s0038g03410 | VIT_03s0017g01800 |
| VIT_04s0008g03770 | VIT_07s0031g03050 | VIT_03s0038g03460 | VIT_03s0017g01830 |
| VIT_04s0008g03810 | VIT_07s0031g03150 | VIT_03s0038g03610 | VIT_03s0017g02160 |
| VIT_04s0008g03820 | VIT_07s0031g03170 | VIT_03s0038g03620 | VIT_03s0017g02180 |
| VIT_04s0008g03880 | VIT_07s0095g00040 | VIT_03s0038g03710 | VIT_03s0017g02290 |
| VIT_04s0008g03890 | VIT_07s0104g00270 | VIT_03s0038g03870 | VIT_03s0017g02350 |
| VIT_04s0008g03900 | VIT_07s0104g00590 | VIT_03s0038g03950 | VIT_03s0038g00030 |
| VIT_04s0008g03940 | VIT_07s0104g00820 | VIT_03s0038g03960 | VIT_03s0038g00120 |
| VIT_04s0008g04200 | VIT_07s0104g00970 | VIT_03s0038g03990 | VIT_03s0038g00160 |
| VIT_04s0008g04250 | VIT_07s0104g01250 | VIT_03s0038g04010 | VIT_03s0038g00170 |
| VIT_04s0008g04290 | VIT_07s0104g01480 | VIT_03s0038g04060 | VIT_03s0038g00210 |
| VIT_04s0008g04310 | VIT_07s0104g01570 | VIT_03s0038g04080 | VIT_03s0038g00270 |
| VIT_04s0008g04480 | VIT_07s0104g01590 | VIT_03s0038g04200 | VIT_03s0038g00310 |
| VIT_04s0008g04610 | VIT_07s0104g01600 | VIT_03s0038g04350 | VIT_03s0038g00340 |
| VIT_04s0008g04670 | VIT_07s0104g01720 | VIT_03s0038g04370 | VIT_03s0038g00370 |
| VIT_04s0008g04760 | VIT_07s0104g01730 | VIT_03s0038g04420 | VIT_03s0038g00380 |
| VIT_04s0008g04770 | VIT_07s0129g00100 | VIT_03s0038g04450 | VIT_03s0038g00420 |
| VIT_04s0008g04940 | VIT_07s0129g00270 | VIT_03s0038g04560 | VIT_03s0038g00450 |
| VIT_04s0008g05050 | VIT_07s0129g00330 | VIT_03s0038g04570 | VIT_03s0038g00530 |
| VIT_04s0008g05070 | VIT_07s0129g00470 | VIT_03s0038g04600 | VIT_03s0038g00610 |
| VIT_04s0008g05160 | VIT_07s0129g00540 | VIT_03s0038g04640 | VIT_03s0038g00620 |
| VIT_04s0008g05210 | VIT_07s0129g01110 | VIT_03s0038g04660 | VIT_03s0038g00800 |
| VIT_04s0008g05250 | VIT_07s0130g00400 | VIT_03s0038g04670 | VIT_03s0038g00820 |
| VIT_04s0008g05280 | VIT_07s0130g00420 | VIT_03s0038g04680 | VIT_03s0038g00920 |
| VIT_04s0008g05870 | VIT_07s0130g00510 | VIT_03s0038g04700 | VIT_03s0038g01310 |
| VIT_04s0008g05960 | VIT_07s0141g00230 | VIT_03s0038g04720 | VIT_03s0038g01370 |
| VIT_04s0008g06010 | VIT_07s0141g00370 | VIT_03s0063g00110 | VIT_03s0038g01490 |
| VIT_04s0008g06130 | VIT_07s0141g00390 | VIT_03s0063g00370 | VIT_03s0038g01620 |
| VIT_04s0008g06220 | VIT_07s0141g00420 | VIT_03s0063g00450 | VIT_03s0038g01650 |

|                   |                   |                   |                   |
|-------------------|-------------------|-------------------|-------------------|
| VIT_04s0008g06250 | VIT_07s0141g00670 | VIT_03s0063g00480 | VIT_03s0038g01760 |
| VIT_04s0008g06300 | VIT_07s0141g00800 | VIT_03s0063g00510 | VIT_03s0038g01780 |
| VIT_04s0008g06590 | VIT_07s0141g00890 | VIT_03s0063g00520 | VIT_03s0038g01810 |
| VIT_04s0008g06620 | VIT_07s0141g00950 | VIT_03s0063g00580 | VIT_03s0038g01930 |
| VIT_04s0008g06680 | VIT_07s0151g00260 | VIT_03s0063g00710 | VIT_03s0038g01960 |
| VIT_04s0008g06730 | VIT_07s0151g00410 | VIT_03s0063g00730 | VIT_03s0038g02070 |
| VIT_04s0008g06760 | VIT_07s0151g00860 | VIT_03s0063g00780 | VIT_03s0038g02080 |
| VIT_04s0008g06810 | VIT_07s0151g01030 | VIT_03s0063g00810 | VIT_03s0038g02090 |
| VIT_04s0008g06860 | VIT_07s0185g00170 | VIT_03s0063g00820 | VIT_03s0038g02100 |
| VIT_04s0008g07050 | VIT_07s0191g00080 | VIT_03s0063g00830 | VIT_03s0038g02110 |
| VIT_04s0008g07210 | VIT_07s0191g00230 | VIT_03s0063g00860 | VIT_03s0038g02210 |
| VIT_04s0023g00060 | VIT_07s0197g00230 | VIT_03s0063g00930 | VIT_03s0038g02290 |
| VIT_04s0023g00270 | VIT_07s0205g00070 | VIT_03s0063g01460 | VIT_03s0038g02310 |
| VIT_04s0023g00390 | VIT_08s0007g00080 | VIT_03s0063g01530 | VIT_03s0038g02380 |
| VIT_04s0023g00470 | VIT_08s0007g00750 | VIT_03s0063g01900 | VIT_03s0038g02430 |
| VIT_04s0023g00620 | VIT_08s0007g00810 | VIT_03s0063g01920 | VIT_03s0038g02440 |
| VIT_04s0023g00730 | VIT_08s0007g00820 | VIT_03s0063g01960 | VIT_03s0038g02460 |
| VIT_04s0023g00750 | VIT_08s0007g00840 | VIT_03s0063g01980 | VIT_03s0038g02470 |
| VIT_04s0023g00770 | VIT_08s0007g00930 | VIT_03s0063g02020 | VIT_03s0038g02610 |
| VIT_04s0023g00870 | VIT_08s0007g01550 | VIT_03s0063g02060 | VIT_03s0038g02670 |
| VIT_04s0023g00960 | VIT_08s0007g01600 | VIT_03s0063g02120 | VIT_03s0038g02740 |
| VIT_04s0023g01070 | VIT_08s0007g01690 | VIT_03s0063g02130 | VIT_03s0038g02810 |
| VIT_04s0023g01130 | VIT_08s0007g01780 | VIT_03s0063g02340 | VIT_03s0038g02850 |
| VIT_04s0023g01160 | VIT_08s0007g02340 | VIT_03s0063g02440 | VIT_03s0038g02870 |
| VIT_04s0023g01330 | VIT_08s0007g02580 | VIT_03s0063g02480 | VIT_03s0038g02950 |
| VIT_04s0023g01360 | VIT_08s0007g02720 | VIT_03s0063g02670 | VIT_03s0038g02970 |
| VIT_04s0023g01510 | VIT_08s0007g02840 | VIT_03s0063g02680 | VIT_03s0038g03200 |
| VIT_04s0023g01690 | VIT_08s0007g03000 | VIT_03s0088g00050 | VIT_03s0038g03250 |
| VIT_04s0023g01770 | VIT_08s0007g03210 | VIT_03s0088g00110 | VIT_03s0038g03400 |
| VIT_04s0023g01980 | VIT_08s0007g03310 | VIT_03s0088g00390 | VIT_03s0038g03560 |
| VIT_04s0023g02350 | VIT_08s0007g03370 | VIT_03s0088g00410 | VIT_03s0038g03640 |
| VIT_04s0023g02480 | VIT_08s0007g03480 | VIT_03s0088g01040 | VIT_03s0038g03720 |
| VIT_04s0023g02490 | VIT_08s0007g03720 | VIT_03s0088g01260 | VIT_03s0038g03740 |
| VIT_04s0023g02500 | VIT_08s0007g04030 | VIT_03s0091g00470 | VIT_03s0038g03750 |
| VIT_04s0023g02590 | VIT_08s0007g04160 | VIT_03s0091g00680 | VIT_03s0038g03800 |
| VIT_04s0023g02700 | VIT_08s0007g04230 | VIT_03s0091g00710 | VIT_03s0038g03810 |
| VIT_04s0023g02750 | VIT_08s0007g04290 | VIT_03s0091g00720 | VIT_03s0038g04040 |
| VIT_04s0023g03020 | VIT_08s0007g04300 | VIT_03s0091g00950 | VIT_03s0038g04180 |
| VIT_04s0023g03320 | VIT_08s0007g04330 | VIT_03s0091g00960 | VIT_03s0038g04240 |
| VIT_04s0023g03460 | VIT_08s0007g04370 | VIT_03s0091g00970 | VIT_03s0038g04290 |
| VIT_04s0023g03530 | VIT_08s0007g04430 | VIT_03s0091g01290 | VIT_03s0038g04330 |
| VIT_04s0023g03540 | VIT_08s0007g04720 | VIT_03s0097g00090 | VIT_03s0038g04340 |
| VIT_04s0023g03560 | VIT_08s0007g04740 | VIT_03s0097g00340 | VIT_03s0038g04390 |
| VIT_04s0023g03760 | VIT_08s0007g05170 | VIT_03s0097g00550 | VIT_03s0038g04430 |
| VIT_04s0023g03870 | VIT_08s0007g05210 | VIT_03s0097g00620 | VIT_03s0063g00060 |
| VIT_04s0023g03880 | VIT_08s0007g05250 | VIT_03s0110g00080 | VIT_03s0063g00080 |
| VIT_04s0043g00310 | VIT_08s0007g05260 | VIT_03s0110g00570 | VIT_03s0063g00270 |
| VIT_04s0043g00440 | VIT_08s0007g05630 | VIT_03s0132g00110 | VIT_03s0063g00280 |
| VIT_04s0043g00710 | VIT_08s0007g05720 | VIT_03s0132g00320 | VIT_03s0063g00290 |
| VIT_04s0043g00820 | VIT_08s0007g06190 | VIT_03s0167g00220 | VIT_03s0063g00300 |
| VIT_04s0043g00840 | VIT_08s0007g06770 | VIT_03s0180g00020 | VIT_03s0063g00440 |
| VIT_04s0044g00120 | VIT_08s0007g06820 | VIT_03s0180g00050 | VIT_03s0063g00630 |
| VIT_04s0044g00300 | VIT_08s0007g06850 | VIT_03s0180g00170 | VIT_03s0063g00650 |
| VIT_04s0044g00630 | VIT_08s0007g06930 | VIT_03s0180g00200 | VIT_03s0063g00720 |
| VIT_04s0044g00640 | VIT_08s0007g07100 | VIT_03s0180g00320 | VIT_03s0063g00850 |
| VIT_04s0044g00810 | VIT_08s0007g07340 | VIT_04s0008g00180 | VIT_03s0063g00900 |
| VIT_04s0044g00850 | VIT_08s0007g07430 | VIT_04s0008g00200 | VIT_03s0063g00920 |



|                   |                   |                   |                   |
|-------------------|-------------------|-------------------|-------------------|
| VIT_04s0044g00860 | VIT_08s0007g08050 | VIT_04s0008g00250 | VIT_03s0063g01080 |
| VIT_04s0044g00890 | VIT_08s0007g08290 | VIT_04s0008g00280 | VIT_03s0063g01170 |
| VIT_04s0044g01290 | VIT_08s0007g08350 | VIT_04s0008g00350 | VIT_03s0063g01240 |
| VIT_04s0044g01300 | VIT_08s0007g08540 | VIT_04s0008g00450 | VIT_03s0063g01340 |
| VIT_04s0044g01360 | VIT_08s0007g08660 | VIT_04s0008g00490 | VIT_03s0063g01360 |
| VIT_04s0044g01370 | VIT_08s0032g00050 | VIT_04s0008g00520 | VIT_03s0063g01380 |
| VIT_04s0044g01420 | VIT_08s0032g00330 | VIT_04s0008g00530 | VIT_03s0063g01410 |
| VIT_04s0044g01490 | VIT_08s0032g00350 | VIT_04s0008g00630 | VIT_03s0063g01430 |
| VIT_04s0044g01550 | VIT_08s0032g00440 | VIT_04s0008g00740 | VIT_03s0063g01510 |
| VIT_04s0044g01830 | VIT_08s0032g00460 | VIT_04s0008g00810 | VIT_03s0063g01620 |
| VIT_04s0044g01940 | VIT_08s0032g00560 | VIT_04s0008g00830 | VIT_03s0063g01780 |
| VIT_04s0069g00300 | VIT_08s0032g00600 | VIT_04s0008g00840 | VIT_03s0063g01790 |
| VIT_04s0069g00520 | VIT_08s0032g00620 | VIT_04s0008g00880 | VIT_03s0063g01870 |
| VIT_04s0069g00550 | VIT_08s0032g00720 | VIT_04s0008g01030 | VIT_03s0063g01990 |
| VIT_04s0069g00730 | VIT_08s0032g00800 | VIT_04s0008g01070 | VIT_03s0063g02080 |
| VIT_04s0069g00760 | VIT_08s0032g00960 | VIT_04s0008g01260 | VIT_03s0063g02110 |
| VIT_04s0069g00800 | VIT_08s0032g01080 | VIT_04s0008g01340 | VIT_03s0063g02400 |
| VIT_04s0079g00610 | VIT_08s0032g01190 | VIT_04s0008g01420 | VIT_03s0063g02460 |
| VIT_04s0079g00650 | VIT_08s0032g01230 | VIT_04s0008g01690 | VIT_03s0063g02470 |
| VIT_04s0079g00660 | VIT_08s0040g00530 | VIT_04s0008g01800 | VIT_03s0063g02520 |
| VIT_04s0079g00800 | VIT_08s0040g01000 | VIT_04s0008g02030 | VIT_03s0063g02590 |
| VIT_04s0079g00840 | VIT_08s0040g01360 | VIT_04s0008g02180 | VIT_03s0063g02630 |
| VIT_04s0210g00130 | VIT_08s0040g01470 | VIT_04s0008g02320 | VIT_03s0063g02640 |
| VIT_05s0020g00070 | VIT_08s0040g01490 | VIT_04s0008g02460 | VIT_03s0088g00100 |
| VIT_05s0020g00120 | VIT_08s0040g01560 | VIT_04s0008g02470 | VIT_03s0088g00270 |
| VIT_05s0020g00170 | VIT_08s0040g01650 | VIT_04s0008g02480 | VIT_03s0088g00320 |
| VIT_05s0020g00250 | VIT_08s0040g01660 | VIT_04s0008g02530 | VIT_03s0088g00500 |
| VIT_05s0020g00290 | VIT_08s0040g01960 | VIT_04s0008g02590 | VIT_03s0088g00990 |
| VIT_05s0020g00310 | VIT_08s0040g02190 | VIT_04s0008g02740 | VIT_03s0088g01050 |
| VIT_05s0020g00320 | VIT_08s0040g02200 | VIT_04s0008g02750 | VIT_03s0088g01070 |
| VIT_05s0020g00480 | VIT_08s0040g02300 | VIT_04s0008g02850 | VIT_03s0088g01100 |
| VIT_05s0020g00840 | VIT_08s0040g02880 | VIT_04s0008g02970 | VIT_03s0088g01130 |
| VIT_05s0020g00850 | VIT_08s0040g02950 | VIT_04s0008g03100 | VIT_03s0088g01180 |
| VIT_05s0020g00860 | VIT_08s0040g03030 | VIT_04s0008g03190 | VIT_03s0091g00210 |
| VIT_05s0020g00870 | VIT_08s0040g03100 | VIT_04s0008g03230 | VIT_03s0091g00320 |
| VIT_05s0020g00910 | VIT_08s0040g03220 | VIT_04s0008g03240 | VIT_03s0091g00370 |
| VIT_05s0020g00940 | VIT_08s0056g00120 | VIT_04s0008g03250 | VIT_03s0091g00400 |
| VIT_05s0020g01000 | VIT_08s0056g00410 | VIT_04s0008g03280 | VIT_03s0091g00480 |
| VIT_05s0020g01060 | VIT_08s0056g00470 | VIT_04s0008g03360 | VIT_03s0091g00540 |
| VIT_05s0020g01120 | VIT_08s0056g00550 | VIT_04s0008g03440 | VIT_03s0091g00570 |
| VIT_05s0020g01130 | VIT_08s0056g00570 | VIT_04s0008g03560 | VIT_03s0091g00590 |
| VIT_05s0020g01290 | VIT_08s0056g00580 | VIT_04s0008g03650 | VIT_03s0091g00620 |
| VIT_05s0020g01430 | VIT_08s0056g00680 | VIT_04s0008g03680 | VIT_03s0091g00670 |
| VIT_05s0020g01440 | VIT_08s0056g00690 | VIT_04s0008g03750 | VIT_03s0091g00740 |
| VIT_05s0020g01560 | VIT_08s0056g00770 | VIT_04s0008g03780 | VIT_03s0091g00810 |
| VIT_05s0020g01630 | VIT_08s0056g01030 | VIT_04s0008g03840 | VIT_03s0091g00820 |
| VIT_05s0020g01670 | VIT_08s0056g01110 | VIT_04s0008g04120 | VIT_03s0091g00850 |
| VIT_05s0020g01790 | VIT_08s0056g01290 | VIT_04s0008g04150 | VIT_03s0091g00990 |
| VIT_05s0020g01840 | VIT_08s0056g01320 | VIT_04s0008g04160 | VIT_03s0091g01220 |
| VIT_05s0020g01880 | VIT_08s0056g01340 | VIT_04s0008g04190 | VIT_03s0091g01230 |
| VIT_05s0020g01930 | VIT_08s0056g01490 | VIT_04s0008g04350 | VIT_03s0097g00060 |
| VIT_05s0020g02040 | VIT_08s0056g01620 | VIT_04s0008g04360 | VIT_03s0097g00140 |
| VIT_05s0020g02180 | VIT_08s0056g01640 | VIT_04s0008g04380 | VIT_03s0097g00290 |
| VIT_05s0020g02260 | VIT_08s0056g01690 | VIT_04s0008g04680 | VIT_03s0097g00580 |
| VIT_05s0020g02330 | VIT_08s0058g00510 | VIT_04s0008g05020 | VIT_03s0110g00160 |
| VIT_05s0020g02400 | VIT_08s0058g00700 | VIT_04s0008g05090 | VIT_03s0110g00200 |
| VIT_05s0020g02440 | VIT_08s0058g00730 | VIT_04s0008g05120 | VIT_03s0110g00280 |

|                   |                   |                   |                   |
|-------------------|-------------------|-------------------|-------------------|
| VIT_05s0020g02450 | VIT_08s0058g01290 | VIT_04s0008g05360 | VIT_03s0110g00560 |
| VIT_05s0020g02490 | VIT_08s0058g01350 | VIT_04s0008g05430 | VIT_03s0132g00050 |
| VIT_05s0020g02540 | VIT_08s0058g01450 | VIT_04s0008g05470 | VIT_03s0132g00070 |
| VIT_05s0020g02580 | VIT_08s0105g00260 | VIT_04s0008g05550 | VIT_03s0132g00080 |
| VIT_05s0020g02700 | VIT_08s0105g00380 | VIT_04s0008g05560 | VIT_03s0132g00100 |
| VIT_05s0020g02720 | VIT_09s0002g00280 | VIT_04s0008g05590 | VIT_03s0132g00210 |
| VIT_05s0020g02840 | VIT_09s0002g00350 | VIT_04s0008g05750 | VIT_03s0132g00450 |
| VIT_05s0020g02900 | VIT_09s0002g00590 | VIT_04s0008g05800 | VIT_03s0180g00010 |
| VIT_05s0020g03020 | VIT_09s0002g00780 | VIT_04s0008g05850 | VIT_03s0180g00080 |
| VIT_05s0020g03050 | VIT_09s0002g00840 | VIT_04s0008g05900 | VIT_03s0180g00230 |
| VIT_05s0020g03060 | VIT_09s0002g00930 | VIT_04s0008g06030 | VIT_03s0180g00250 |
| VIT_05s0020g03320 | VIT_09s0002g01350 | VIT_04s0008g06050 | VIT_03s0180g00260 |
| VIT_05s0020g03330 | VIT_09s0002g01410 | VIT_04s0008g06080 | VIT_03s0180g00290 |
| VIT_05s0020g03410 | VIT_09s0002g01430 | VIT_04s0008g06320 | VIT_04s0008g00030 |
| VIT_05s0020g03440 | VIT_09s0002g01560 | VIT_04s0008g06570 | VIT_04s0008g00140 |
| VIT_05s0020g03480 | VIT_09s0002g01800 | VIT_04s0008g06660 | VIT_04s0008g00210 |
| VIT_05s0020g03490 | VIT_09s0002g02010 | VIT_04s0008g06790 | VIT_04s0008g00230 |
| VIT_05s0020g03510 | VIT_09s0002g02280 | VIT_04s0008g06920 | VIT_04s0008g00390 |
| VIT_05s0020g03530 | VIT_09s0002g02440 | VIT_04s0008g06930 | VIT_04s0008g00420 |
| VIT_05s0020g03570 | VIT_09s0002g02530 | VIT_04s0008g07340 | VIT_04s0008g00430 |
| VIT_05s0020g03620 | VIT_09s0002g02550 | VIT_04s0008g07370 | VIT_04s0008g00460 |
| VIT_05s0020g03630 | VIT_09s0002g02610 | VIT_04s0023g00050 | VIT_04s0008g00480 |
| VIT_05s0020g03740 | VIT_09s0002g02900 | VIT_04s0023g00080 | VIT_04s0008g00540 |
| VIT_05s0020g03850 | VIT_09s0002g03520 | VIT_04s0023g00310 | VIT_04s0008g00600 |
| VIT_05s0020g04050 | VIT_09s0002g03550 | VIT_04s0023g00410 | VIT_04s0008g00610 |
| VIT_05s0020g04140 | VIT_09s0002g03560 | VIT_04s0023g00520 | VIT_04s0008g00820 |
| VIT_05s0020g04250 | VIT_09s0002g03570 | VIT_04s0023g00530 | VIT_04s0008g00900 |
| VIT_05s0020g04460 | VIT_09s0002g03640 | VIT_04s0023g00550 | VIT_04s0008g00950 |
| VIT_05s0020g04480 | VIT_09s0002g03950 | VIT_04s0023g00590 | VIT_04s0008g00960 |
| VIT_05s0020g04580 | VIT_09s0002g04050 | VIT_04s0023g00610 | VIT_04s0008g01060 |
| VIT_05s0020g04710 | VIT_09s0002g04110 | VIT_04s0023g00820 | VIT_04s0008g01090 |
| VIT_05s0020g04750 | VIT_09s0002g04120 | VIT_04s0023g00910 | VIT_04s0008g01100 |
| VIT_05s0020g04760 | VIT_09s0002g04160 | VIT_04s0023g00920 | VIT_04s0008g01190 |
| VIT_05s0020g04770 | VIT_09s0002g04430 | VIT_04s0023g00930 | VIT_04s0008g01240 |
| VIT_05s0020g04820 | VIT_09s0002g04670 | VIT_04s0023g01000 | VIT_04s0008g01320 |
| VIT_05s0020g04840 | VIT_09s0002g04830 | VIT_04s0023g01010 | VIT_04s0008g01330 |
| VIT_05s0020g04850 | VIT_09s0002g04870 | VIT_04s0023g01040 | VIT_04s0008g01370 |
| VIT_05s0020g04920 | VIT_09s0002g05250 | VIT_04s0023g01250 | VIT_04s0008g01380 |
| VIT_05s0020g04930 | VIT_09s0002g05950 | VIT_04s0023g01350 | VIT_04s0008g01450 |
| VIT_05s0020g04940 | VIT_09s0002g06000 | VIT_04s0023g01380 | VIT_04s0008g01480 |
| VIT_05s0029g00090 | VIT_09s0002g06040 | VIT_04s0023g01430 | VIT_04s0008g01490 |
| VIT_05s0029g00180 | VIT_09s0002g06140 | VIT_04s0023g01450 | VIT_04s0008g01500 |
| VIT_05s0029g00450 | VIT_09s0002g06160 | VIT_04s0023g01460 | VIT_04s0008g01510 |
| VIT_05s0029g00490 | VIT_09s0002g06380 | VIT_04s0023g01490 | VIT_04s0008g01520 |
| VIT_05s0029g00600 | VIT_09s0002g06460 | VIT_04s0023g01540 | VIT_04s0008g01530 |
| VIT_05s0029g00630 | VIT_09s0002g06890 | VIT_04s0023g01650 | VIT_04s0008g01560 |
| VIT_05s0029g00650 | VIT_09s0002g07210 | VIT_04s0023g01660 | VIT_04s0008g01580 |
| VIT_05s0029g01030 | VIT_09s0002g07570 | VIT_04s0023g01760 | VIT_04s0008g01590 |
| VIT_05s0029g01060 | VIT_09s0002g07610 | VIT_04s0023g01870 | VIT_04s0008g01660 |
| VIT_05s0029g01120 | VIT_09s0002g07620 | VIT_04s0023g01890 | VIT_04s0008g01760 |
| VIT_05s0029g01130 | VIT_09s0002g07810 | VIT_04s0023g01940 | VIT_04s0008g01790 |
| VIT_05s0029g01230 | VIT_09s0002g08940 | VIT_04s0023g02010 | VIT_04s0008g01880 |
| VIT_05s0029g01410 | VIT_09s0002g09250 | VIT_04s0023g02130 | VIT_04s0008g01890 |
| VIT_05s0029g01570 | VIT_09s0018g00300 | VIT_04s0023g02160 | VIT_04s0008g01900 |
| VIT_05s0049g00060 | VIT_09s0018g00310 | VIT_04s0023g02360 | VIT_04s0008g01920 |
| VIT_05s0049g00210 | VIT_09s0018g00400 | VIT_04s0023g02410 | VIT_04s0008g01940 |
| VIT_05s0049g00250 | VIT_09s0018g00440 | VIT_04s0023g02430 | VIT_04s0008g02000 |

|                   |                   |                   |                   |
|-------------------|-------------------|-------------------|-------------------|
| VIT_05s0049g00300 | VIT_09s0018g00600 | VIT_04s0023g02540 | VIT_04s0008g02040 |
| VIT_05s0049g00310 | VIT_09s0018g00630 | VIT_04s0023g02550 | VIT_04s0008g02050 |
| VIT_05s0049g00400 | VIT_09s0018g00650 | VIT_04s0023g02580 | VIT_04s0008g02080 |
| VIT_05s0049g00470 | VIT_09s0018g01270 | VIT_04s0023g02640 | VIT_04s0008g02120 |
| VIT_05s0049g00550 | VIT_09s0018g01400 | VIT_04s0023g02730 | VIT_04s0008g02220 |
| VIT_05s0049g00620 | VIT_09s0018g01620 | VIT_04s0023g02920 | VIT_04s0008g02270 |
| VIT_05s0049g00680 | VIT_09s0018g02000 | VIT_04s0023g02930 | VIT_04s0008g02350 |
| VIT_05s0049g01110 | VIT_09s0018g02070 | VIT_04s0023g02940 | VIT_04s0008g02370 |
| VIT_05s0049g01130 | VIT_09s0018g02130 | VIT_04s0023g03150 | VIT_04s0008g02490 |
| VIT_05s0049g01270 | VIT_09s0054g00340 | VIT_04s0023g03250 | VIT_04s0008g02550 |
| VIT_05s0049g01320 | VIT_09s0054g01090 | VIT_04s0023g03300 | VIT_04s0008g02650 |
| VIT_05s0049g01370 | VIT_09s0054g01200 | VIT_04s0023g03340 | VIT_04s0008g02660 |
| VIT_05s0049g01500 | VIT_09s0054g01220 | VIT_04s0023g03370 | VIT_04s0008g02720 |
| VIT_05s0049g01510 | VIT_09s0054g01250 | VIT_04s0023g03620 | VIT_04s0008g02830 |
| VIT_05s0049g01580 | VIT_09s0054g01680 | VIT_04s0023g03670 | VIT_04s0008g02900 |
| VIT_05s0049g01620 | VIT_09s0054g01750 | VIT_04s0023g03690 | VIT_04s0008g03000 |
| VIT_05s0049g01810 | VIT_09s0054g01770 | VIT_04s0023g03700 | VIT_04s0008g03030 |
| VIT_05s0049g01880 | VIT_09s0054g01820 | VIT_04s0023g03820 | VIT_04s0008g03040 |
| VIT_05s0049g01900 | VIT_09s0070g00070 | VIT_04s0023g03830 | VIT_04s0008g03070 |
| VIT_05s0049g01950 | VIT_09s0070g00140 | VIT_04s0023g03860 | VIT_04s0008g03140 |
| VIT_05s0049g02120 | VIT_09s0070g00320 | VIT_04s0043g00270 | VIT_04s0008g03170 |
| VIT_05s0049g02210 | VIT_09s0070g00370 | VIT_04s0043g00750 | VIT_04s0008g03320 |
| VIT_05s0049g02300 | VIT_09s0070g00560 | VIT_04s0044g00030 | VIT_04s0008g03380 |
| VIT_05s0051g00330 | VIT_09s0070g00580 | VIT_04s0044g00040 | VIT_04s0008g03460 |
| VIT_05s0051g00340 | VIT_09s0070g00620 | VIT_04s0044g00110 | VIT_04s0008g03670 |
| VIT_05s0051g00380 | VIT_09s0096g00420 | VIT_04s0044g00190 | VIT_04s0008g03690 |
| VIT_05s0051g00440 | VIT_09s0096g00760 | VIT_04s0044g00220 | VIT_04s0008g03770 |
| VIT_05s0051g00460 | VIT_10s0003g00170 | VIT_04s0044g00290 | VIT_04s0008g03790 |
| VIT_05s0051g00530 | VIT_10s0003g00400 | VIT_04s0044g00310 | VIT_04s0008g03810 |
| VIT_05s0051g00830 | VIT_10s0003g00480 | VIT_04s0044g00470 | VIT_04s0008g03820 |
| VIT_05s0051g00850 | VIT_10s0003g00500 | VIT_04s0044g00550 | VIT_04s0008g03830 |
| VIT_05s0051g00860 | VIT_10s0003g00790 | VIT_04s0044g00580 | VIT_04s0008g03870 |
| VIT_05s0062g00250 | VIT_10s0003g00940 | VIT_04s0044g00650 | VIT_04s0008g03890 |
| VIT_05s0062g00880 | VIT_10s0003g01000 | VIT_04s0044g00660 | VIT_04s0008g04290 |
| VIT_05s0062g00910 | VIT_10s0003g01010 | VIT_04s0044g00710 | VIT_04s0008g04310 |
| VIT_05s0062g00990 | VIT_10s0003g01150 | VIT_04s0044g00720 | VIT_04s0008g04400 |
| VIT_05s0062g01000 | VIT_10s0003g01410 | VIT_04s0044g00730 | VIT_04s0008g04480 |
| VIT_05s0062g01010 | VIT_10s0003g02070 | VIT_04s0044g00790 | VIT_04s0008g04590 |
| VIT_05s0062g01030 | VIT_10s0003g02160 | VIT_04s0044g00800 | VIT_04s0008g04600 |
| VIT_05s0062g01040 | VIT_10s0003g02260 | VIT_04s0044g00880 | VIT_04s0008g04610 |
| VIT_05s0062g01050 | VIT_10s0003g02460 | VIT_04s0044g01090 | VIT_04s0008g04640 |
| VIT_05s0062g01110 | VIT_10s0003g02470 | VIT_04s0044g01150 | VIT_04s0008g04770 |
| VIT_05s0062g01210 | VIT_10s0003g02730 | VIT_04s0044g01210 | VIT_04s0008g04840 |
| VIT_05s0062g01310 | VIT_10s0003g02760 | VIT_04s0044g01320 | VIT_04s0008g04940 |
| VIT_05s0062g01420 | VIT_10s0003g02880 | VIT_04s0044g01330 | VIT_04s0008g05050 |
| VIT_05s0077g00110 | VIT_10s0003g03650 | VIT_04s0044g01480 | VIT_04s0008g05060 |
| VIT_05s0077g00120 | VIT_10s0003g03890 | VIT_04s0044g01650 | VIT_04s0008g05160 |
| VIT_05s0077g00170 | VIT_10s0003g04000 | VIT_04s0044g01730 | VIT_04s0008g05190 |
| VIT_05s0077g00220 | VIT_10s0003g04060 | VIT_04s0044g01750 | VIT_04s0008g05210 |
| VIT_05s0077g00410 | VIT_10s0003g04360 | VIT_04s0044g01850 | VIT_04s0008g05240 |
| VIT_05s0077g00510 | VIT_10s0003g04470 | VIT_04s0044g01860 | VIT_04s0008g05250 |
| VIT_05s0077g00570 | VIT_10s0003g04820 | VIT_04s0044g01880 | VIT_04s0008g05270 |
| VIT_05s0077g00660 | VIT_10s0003g04960 | VIT_04s0044g01980 | VIT_04s0008g05280 |
| VIT_05s0077g00680 | VIT_10s0003g05410 | VIT_04s0044g01990 | VIT_04s0008g05350 |
| VIT_05s0077g00720 | VIT_10s0003g05430 | VIT_04s0044g02010 | VIT_04s0008g05380 |
| VIT_05s0077g00740 | VIT_10s0003g05500 | VIT_04s0044g02020 | VIT_04s0008g05460 |
| VIT_05s0077g00750 | VIT_10s0042g00610 | VIT_04s0069g00010 | VIT_04s0008g05490 |

|                   |                   |                   |                   |
|-------------------|-------------------|-------------------|-------------------|
| VIT_05s0077g00820 | VIT_10s0042g00890 | VIT_04s0069g00140 | VIT_04s0008g05670 |
| VIT_05s0077g00840 | VIT_10s0071g00160 | VIT_04s0069g00470 | VIT_04s0008g05760 |
| VIT_05s0077g01000 | VIT_10s0071g00210 | VIT_04s0069g00540 | VIT_04s0008g05960 |
| VIT_05s0077g01050 | VIT_10s0071g00460 | VIT_04s0069g00770 | VIT_04s0008g05980 |
| VIT_05s0077g01160 | VIT_10s0071g00890 | VIT_04s0069g00840 | VIT_04s0008g06010 |
| VIT_05s0077g01310 | VIT_10s0071g00930 | VIT_04s0069g00850 | VIT_04s0008g06090 |
| VIT_05s0077g01320 | VIT_10s0071g01080 | VIT_04s0069g01050 | VIT_04s0008g06130 |
| VIT_05s0077g01440 | VIT_10s0071g01140 | VIT_04s0079g00010 | VIT_04s0008g06140 |
| VIT_05s0077g01500 | VIT_10s0092g00110 | VIT_04s0079g00590 | VIT_04s0008g06150 |
| VIT_05s0077g01830 | VIT_10s0092g00210 | VIT_04s0079g00600 | VIT_04s0008g06540 |
| VIT_05s0077g01850 | VIT_10s0092g00360 | VIT_04s0079g00620 | VIT_04s0008g06590 |
| VIT_05s0077g01880 | VIT_10s0116g00210 | VIT_04s0079g00690 | VIT_04s0008g06620 |
| VIT_05s0077g02080 | VIT_10s0116g00260 | VIT_04s0079g00700 | VIT_04s0008g06690 |
| VIT_05s0077g02110 | VIT_10s0116g00290 | VIT_04s0210g00180 | VIT_04s0008g06810 |
| VIT_05s0077g02190 | VIT_10s0116g00310 | VIT_05s0020g00380 | VIT_04s0008g06860 |
| VIT_05s0077g02210 | VIT_10s0116g00400 | VIT_05s0020g00490 | VIT_04s0008g06890 |
| VIT_05s0094g00020 | VIT_10s0116g00480 | VIT_05s0020g00640 | VIT_04s0008g06900 |
| VIT_05s0094g00100 | VIT_10s0116g01310 | VIT_05s0020g00670 | VIT_04s0008g07210 |
| VIT_05s0094g00140 | VIT_10s0116g01730 | VIT_05s0020g00700 | VIT_04s0008g07360 |
| VIT_05s0094g00200 | VIT_10s0405g00020 | VIT_05s0020g00740 | VIT_04s0023g00060 |
| VIT_05s0094g00300 | VIT_11s0016g00120 | VIT_05s0020g00970 | VIT_04s0023g00110 |
| VIT_05s0094g00360 | VIT_11s0016g00130 | VIT_05s0020g01020 | VIT_04s0023g00130 |
| VIT_05s0094g00380 | VIT_11s0016g00360 | VIT_05s0020g01180 | VIT_04s0023g00270 |
| VIT_05s0094g00410 | VIT_11s0016g00430 | VIT_05s0020g01320 | VIT_04s0023g00390 |
| VIT_05s0094g00560 | VIT_11s0016g00440 | VIT_05s0020g01480 | VIT_04s0023g00470 |
| VIT_05s0094g00580 | VIT_11s0016g00610 | VIT_05s0020g01540 | VIT_04s0023g00680 |
| VIT_05s0094g00650 | VIT_11s0016g00760 | VIT_05s0020g01550 | VIT_04s0023g00720 |
| VIT_05s0094g00740 | VIT_11s0016g00800 | VIT_05s0020g01660 | VIT_04s0023g00770 |
| VIT_05s0094g00910 | VIT_11s0016g01160 | VIT_05s0020g01900 | VIT_04s0023g00870 |
| VIT_05s0094g01150 | VIT_11s0016g01260 | VIT_05s0020g02150 | VIT_04s0023g00880 |
| VIT_05s0094g01160 | VIT_11s0016g01600 | VIT_05s0020g02210 | VIT_04s0023g00970 |
| VIT_05s0094g01330 | VIT_11s0016g01620 | VIT_05s0020g02250 | VIT_04s0023g01090 |
| VIT_05s0094g01340 | VIT_11s0016g02070 | VIT_05s0020g02410 | VIT_04s0023g01160 |
| VIT_05s0094g01400 | VIT_11s0016g02200 | VIT_05s0020g02500 | VIT_04s0023g01240 |
| VIT_05s0094g01410 | VIT_11s0016g02670 | VIT_05s0020g02510 | VIT_04s0023g01330 |
| VIT_05s0094g01440 | VIT_11s0016g02690 | VIT_05s0020g02560 | VIT_04s0023g01340 |
| VIT_05s0094g01470 | VIT_11s0016g02720 | VIT_05s0020g02640 | VIT_04s0023g01360 |
| VIT_05s0094g01640 | VIT_11s0016g03420 | VIT_05s0020g02680 | VIT_04s0023g01770 |
| VIT_05s0094g01650 | VIT_11s0016g03440 | VIT_05s0020g02760 | VIT_04s0023g01800 |
| VIT_05s0102g00020 | VIT_11s0016g03480 | VIT_05s0020g02790 | VIT_04s0023g01980 |
| VIT_05s0102g00050 | VIT_11s0016g03720 | VIT_05s0020g02800 | VIT_04s0023g02190 |
| VIT_05s0102g00270 | VIT_11s0016g03780 | VIT_05s0020g02820 | VIT_04s0023g02420 |
| VIT_05s0102g00430 | VIT_11s0016g03790 | VIT_05s0020g02850 | VIT_04s0023g02480 |
| VIT_05s0102g00440 | VIT_11s0016g03840 | VIT_05s0020g02880 | VIT_04s0023g02490 |
| VIT_05s0102g00510 | VIT_11s0016g04020 | VIT_05s0020g02980 | VIT_04s0023g02520 |
| VIT_05s0102g00540 | VIT_11s0016g04120 | VIT_05s0020g03170 | VIT_04s0023g02530 |
| VIT_05s0102g00550 | VIT_11s0016g04130 | VIT_05s0020g03280 | VIT_04s0023g02610 |
| VIT_05s0102g00560 | VIT_11s0016g04160 | VIT_05s0020g03370 | VIT_04s0023g02830 |
| VIT_05s0102g00590 | VIT_11s0016g04340 | VIT_05s0020g03470 | VIT_04s0023g03130 |
| VIT_05s0102g00600 | VIT_11s0016g04430 | VIT_05s0020g03610 | VIT_04s0023g03240 |
| VIT_05s0102g00610 | VIT_11s0016g04680 | VIT_05s0020g03650 | VIT_04s0023g03320 |
| VIT_05s0102g00620 | VIT_11s0016g04690 | VIT_05s0020g03670 | VIT_04s0023g03420 |
| VIT_05s0102g00640 | VIT_11s0016g04710 | VIT_05s0020g03760 | VIT_04s0023g03450 |
| VIT_05s0102g00650 | VIT_11s0016g04850 | VIT_05s0020g03770 | VIT_04s0023g03460 |
| VIT_05s0102g00760 | VIT_11s0016g04940 | VIT_05s0020g03920 | VIT_04s0023g03470 |
| VIT_05s0102g01120 | VIT_11s0016g05040 | VIT_05s0020g03930 | VIT_04s0023g03530 |
| VIT_05s0102g01130 | VIT_11s0016g05100 | VIT_05s0020g03970 | VIT_04s0023g03540 |

|                   |                   |                   |                   |
|-------------------|-------------------|-------------------|-------------------|
| VIT_05s0102g01160 | VIT_11s0016g05120 | VIT_05s0020g04000 | VIT_04s0023g03560 |
| VIT_05s0102g01190 | VIT_11s0016g05410 | VIT_05s0020g04180 | VIT_04s0023g03660 |
| VIT_05s0102g01220 | VIT_11s0016g05450 | VIT_05s0020g04220 | VIT_04s0023g03870 |
| VIT_05s0124g00060 | VIT_11s0016g05470 | VIT_05s0020g04240 | VIT_04s0023g03880 |
| VIT_05s0124g00330 | VIT_11s0016g05480 | VIT_05s0020g04260 | VIT_04s0043g00370 |
| VIT_05s0124g00340 | VIT_11s0016g05560 | VIT_05s0020g04380 | VIT_04s0043g00820 |
| VIT_05s0124g00400 | VIT_11s0016g05810 | VIT_05s0020g04510 | VIT_04s0043g00830 |
| VIT_05s0124g00410 | VIT_11s0037g00070 | VIT_05s0020g04540 | VIT_04s0043g00840 |
| VIT_05s0124g00640 | VIT_11s0037g00130 | VIT_05s0020g04650 | VIT_04s0043g00970 |
| VIT_05s0165g00260 | VIT_11s0037g00230 | VIT_05s0020g04690 | VIT_04s0043g01040 |
| VIT_06s0004g00170 | VIT_11s0037g00310 | VIT_05s0020g04780 | VIT_04s0044g00070 |
| VIT_06s0004g00180 | VIT_11s0037g00610 | VIT_05s0020g05060 | VIT_04s0044g00080 |
| VIT_06s0004g00240 | VIT_11s0037g00620 | VIT_05s0029g00010 | VIT_04s0044g00120 |
| VIT_06s0004g00340 | VIT_11s0037g00850 | VIT_05s0029g00070 | VIT_04s0044g00130 |
| VIT_06s0004g00370 | VIT_11s0037g01030 | VIT_05s0029g00110 | VIT_04s0044g00160 |
| VIT_06s0004g00390 | VIT_11s0037g01080 | VIT_05s0029g00140 | VIT_04s0044g00610 |
| VIT_06s0004g00490 | VIT_11s0037g01280 | VIT_05s0029g00280 | VIT_04s0044g00630 |
| VIT_06s0004g00560 | VIT_11s0052g00140 | VIT_05s0029g00310 | VIT_04s0044g00850 |
| VIT_06s0004g00730 | VIT_11s0052g00150 | VIT_05s0029g00400 | VIT_04s0044g00860 |
| VIT_06s0004g00810 | VIT_11s0052g00190 | VIT_05s0029g00410 | VIT_04s0044g00890 |
| VIT_06s0004g00860 | VIT_11s0052g00410 | VIT_05s0029g00620 | VIT_04s0044g00920 |
| VIT_06s0004g00940 | VIT_11s0052g00510 | VIT_05s0029g00770 | VIT_04s0044g01160 |
| VIT_06s0004g01060 | VIT_11s0052g00860 | VIT_05s0029g00860 | VIT_04s0044g01190 |
| VIT_06s0004g01070 | VIT_11s0052g01030 | VIT_05s0029g00870 | VIT_04s0044g01230 |
| VIT_06s0004g01110 | VIT_11s0052g01040 | VIT_05s0029g01150 | VIT_04s0044g01240 |
| VIT_06s0004g01310 | VIT_11s0052g01290 | VIT_05s0029g01450 | VIT_04s0044g01260 |
| VIT_06s0004g01320 | VIT_11s0052g01330 | VIT_05s0029g01490 | VIT_04s0044g01290 |
| VIT_06s0004g01370 | VIT_11s0052g01370 | VIT_05s0029g01540 | VIT_04s0044g01300 |
| VIT_06s0004g01520 | VIT_11s0052g01390 | VIT_05s0049g00110 | VIT_04s0044g01360 |
| VIT_06s0004g01630 | VIT_11s0052g01480 | VIT_05s0049g00140 | VIT_04s0044g01490 |
| VIT_06s0004g01920 | VIT_11s0052g01500 | VIT_05s0049g00200 | VIT_04s0044g01500 |
| VIT_06s0004g02070 | VIT_11s0052g01510 | VIT_05s0049g00290 | VIT_04s0044g01530 |
| VIT_06s0004g02080 | VIT_11s0052g01540 | VIT_05s0049g00330 | VIT_04s0044g01550 |
| VIT_06s0004g02090 | VIT_11s0052g01600 | VIT_05s0049g00370 | VIT_04s0044g01800 |
| VIT_06s0004g02220 | VIT_11s0052g01820 | VIT_05s0049g00440 | VIT_04s0044g01820 |
| VIT_06s0004g02430 | VIT_11s0065g00040 | VIT_05s0049g00450 | VIT_04s0044g01940 |
| VIT_06s0004g02660 | VIT_11s0065g00150 | VIT_05s0049g00880 | VIT_04s0044g02050 |
| VIT_06s0004g02960 | VIT_11s0065g00240 | VIT_05s0049g00890 | VIT_04s0069g00410 |
| VIT_06s0004g03010 | VIT_11s0065g00580 | VIT_05s0049g00930 | VIT_04s0069g00440 |
| VIT_06s0004g03150 | VIT_11s0065g00600 | VIT_05s0049g00940 | VIT_04s0069g00550 |
| VIT_06s0004g03230 | VIT_11s0065g00610 | VIT_05s0049g00970 | VIT_04s0069g00620 |
| VIT_06s0004g03410 | VIT_11s0065g00660 | VIT_05s0049g00980 | VIT_04s0069g00710 |
| VIT_06s0004g03430 | VIT_11s0065g00710 | VIT_05s0049g01010 | VIT_04s0069g00730 |
| VIT_06s0004g03470 | VIT_11s0065g00850 | VIT_05s0049g01050 | VIT_04s0069g00740 |
| VIT_06s0004g03600 | VIT_11s0065g00900 | VIT_05s0049g01170 | VIT_04s0069g00760 |
| VIT_06s0004g03630 | VIT_11s0065g00930 | VIT_05s0049g01180 | VIT_04s0079g00020 |
| VIT_06s0004g03880 | VIT_11s0065g00940 | VIT_05s0049g01200 | VIT_04s0079g00350 |
| VIT_06s0004g03910 | VIT_11s0065g01060 | VIT_05s0049g01240 | VIT_04s0079g00510 |
| VIT_06s0004g04040 | VIT_11s0065g01090 | VIT_05s0049g01290 | VIT_04s0079g00610 |
| VIT_06s0004g04110 | VIT_11s0078g00270 | VIT_05s0049g01330 | VIT_04s0079g00650 |
| VIT_06s0004g04420 | VIT_11s0078g00310 | VIT_05s0049g01400 | VIT_04s0079g00660 |
| VIT_06s0004g04430 | VIT_11s0078g00400 | VIT_05s0049g01410 | VIT_04s0079g00670 |
| VIT_06s0004g04450 | VIT_11s0103g00120 | VIT_05s0049g01450 | VIT_04s0079g00800 |
| VIT_06s0004g04470 | VIT_11s0103g00490 | VIT_05s0049g01470 | VIT_04s0079g00810 |
| VIT_06s0004g04480 | VIT_11s0103g00570 | VIT_05s0049g01550 | VIT_04s0079g00840 |
| VIT_06s0004g04510 | VIT_11s0103g00590 | VIT_05s0049g01800 | VIT_04s0159g00050 |
| VIT_06s0004g04770 | VIT_11s0103g00760 | VIT_05s0049g02080 | VIT_04s0210g00030 |

|                   |                   |                   |                   |
|-------------------|-------------------|-------------------|-------------------|
| VIT_06s0004g04990 | VIT_11s0118g00080 | VIT_05s0049g02320 | VIT_04s0210g00070 |
| VIT_06s0004g05160 | VIT_11s0118g00090 | VIT_05s0049g02350 | VIT_04s0210g00110 |
| VIT_06s0004g05390 | VIT_11s0118g00250 | VIT_05s0051g00010 | VIT_04s0210g00130 |
| VIT_06s0004g05500 | VIT_11s0118g00410 | VIT_05s0051g00930 | VIT_04s0210g00140 |
| VIT_06s0004g05640 | VIT_11s0118g00440 | VIT_05s0062g00200 | VIT_05s0020g00070 |
| VIT_06s0004g05650 | VIT_11s0118g00490 | VIT_05s0062g00240 | VIT_05s0020g00080 |
| VIT_06s0004g05770 | VIT_11s0118g00630 | VIT_05s0062g00460 | VIT_05s0020g00120 |
| VIT_06s0004g05850 | VIT_11s0118g00660 | VIT_05s0062g00830 | VIT_05s0020g00170 |
| VIT_06s0004g05870 | VIT_11s0118g00690 | VIT_05s0062g00860 | VIT_05s0020g00220 |
| VIT_06s0004g06010 | VIT_11s0149g00040 | VIT_05s0062g01190 | VIT_05s0020g00250 |
| VIT_06s0004g06050 | VIT_11s0206g00170 | VIT_05s0062g01250 | VIT_05s0020g00290 |
| VIT_06s0004g06070 | VIT_12s0028g00200 | VIT_05s0062g01270 | VIT_05s0020g00310 |
| VIT_06s0004g06310 | VIT_12s0028g00450 | VIT_05s0062g01290 | VIT_05s0020g00320 |
| VIT_06s0004g06630 | VIT_12s0028g00720 | VIT_05s0062g01360 | VIT_05s0020g00330 |
| VIT_06s0004g06780 | VIT_12s0028g00810 | VIT_05s0062g01430 | VIT_05s0020g00350 |
| VIT_06s0004g06790 | VIT_12s0028g00830 | VIT_05s0077g00030 | VIT_05s0020g00390 |
| VIT_06s0004g06850 | VIT_12s0028g00860 | VIT_05s0077g00080 | VIT_05s0020g00600 |
| VIT_06s0004g06880 | VIT_12s0028g01250 | VIT_05s0077g00260 | VIT_05s0020g00630 |
| VIT_06s0004g07130 | VIT_12s0028g01360 | VIT_05s0077g00450 | VIT_05s0020g00790 |
| VIT_06s0004g07180 | VIT_12s0028g01720 | VIT_05s0077g00520 | VIT_05s0020g00830 |
| VIT_06s0004g07400 | VIT_12s0028g01730 | VIT_05s0077g00610 | VIT_05s0020g00840 |
| VIT_06s0004g07560 | VIT_12s0028g01920 | VIT_05s0077g00630 | VIT_05s0020g00870 |
| VIT_06s0004g07650 | VIT_12s0028g02520 | VIT_05s0077g00810 | VIT_05s0020g00880 |
| VIT_06s0004g07690 | VIT_12s0028g02550 | VIT_05s0077g00830 | VIT_05s0020g00910 |
| VIT_06s0004g07800 | VIT_12s0028g03720 | VIT_05s0077g00920 | VIT_05s0020g00920 |
| VIT_06s0004g07810 | VIT_12s0028g03940 | VIT_05s0077g00950 | VIT_05s0020g00930 |
| VIT_06s0004g07940 | VIT_12s0034g00030 | VIT_05s0077g01040 | VIT_05s0020g00940 |
| VIT_06s0004g08050 | VIT_12s0034g00130 | VIT_05s0077g01070 | VIT_05s0020g01000 |
| VIT_06s0004g08190 | VIT_12s0034g01130 | VIT_05s0077g01120 | VIT_05s0020g01010 |
| VIT_06s0004g08200 | VIT_12s0034g01330 | VIT_05s0077g01340 | VIT_05s0020g01030 |
| VIT_06s0004g08330 | VIT_12s0034g01370 | VIT_05s0077g01430 | VIT_05s0020g01060 |
| VIT_06s0004g08340 | VIT_12s0034g02140 | VIT_05s0077g01480 | VIT_05s0020g01130 |
| VIT_06s0004g08380 | VIT_12s0034g02380 | VIT_05s0077g01530 | VIT_05s0020g01150 |
| VIT_06s0009g00550 | VIT_12s0034g02440 | VIT_05s0077g01720 | VIT_05s0020g01240 |
| VIT_06s0009g00650 | VIT_12s0034g02530 | VIT_05s0077g01730 | VIT_05s0020g01330 |
| VIT_06s0009g00980 | VIT_12s0034g02590 | VIT_05s0077g01750 | VIT_05s0020g01390 |
| VIT_06s0009g01010 | VIT_12s0035g00080 | VIT_05s0077g01770 | VIT_05s0020g01430 |
| VIT_06s0009g01030 | VIT_12s0035g00200 | VIT_05s0077g01780 | VIT_05s0020g01440 |
| VIT_06s0009g01070 | VIT_12s0035g00590 | VIT_05s0077g01900 | VIT_05s0020g01560 |
| VIT_06s0009g01350 | VIT_12s0035g00800 | VIT_05s0077g01960 | VIT_05s0020g01630 |
| VIT_06s0009g01360 | VIT_12s0035g01070 | VIT_05s0077g01990 | VIT_05s0020g01670 |
| VIT_06s0009g01450 | VIT_12s0035g01110 | VIT_05s0077g02020 | VIT_05s0020g01830 |
| VIT_06s0009g01730 | VIT_12s0035g01210 | VIT_05s0077g02040 | VIT_05s0020g01850 |
| VIT_06s0009g01770 | VIT_12s0035g01560 | VIT_05s0077g02260 | VIT_05s0020g01880 |
| VIT_06s0009g01790 | VIT_12s0035g01650 | VIT_05s0077g02310 | VIT_05s0020g01930 |
| VIT_06s0009g02050 | VIT_12s0035g01690 | VIT_05s0077g02350 | VIT_05s0020g02040 |
| VIT_06s0009g02140 | VIT_12s0035g01700 | VIT_05s0094g00250 | VIT_05s0020g02090 |
| VIT_06s0009g02150 | VIT_12s0035g01780 | VIT_05s0094g00390 | VIT_05s0020g02130 |
| VIT_06s0009g02220 | VIT_12s0035g01980 | VIT_05s0094g00420 | VIT_05s0020g02170 |
| VIT_06s0009g02300 | VIT_12s0055g00030 | VIT_05s0094g00510 | VIT_05s0020g02180 |
| VIT_06s0009g02410 | VIT_12s0055g00050 | VIT_05s0094g00520 | VIT_05s0020g02230 |
| VIT_06s0009g02450 | VIT_12s0055g00610 | VIT_05s0094g00530 | VIT_05s0020g02350 |
| VIT_06s0009g02550 | VIT_12s0055g00650 | VIT_05s0094g00710 | VIT_05s0020g02400 |
| VIT_06s0009g02740 | VIT_12s0055g00710 | VIT_05s0094g00770 | VIT_05s0020g02440 |
| VIT_06s0009g03080 | VIT_12s0055g00780 | VIT_05s0094g00810 | VIT_05s0020g02450 |
| VIT_06s0009g03440 | VIT_12s0055g01200 | VIT_05s0094g00860 | VIT_05s0020g02490 |
| VIT_06s0009g03560 | VIT_12s0055g01250 | VIT_05s0094g00890 | VIT_05s0020g02540 |

VIT\_06s0009g03610 VIT\_12s0057g00030  
VIT\_06s0009g03710 VIT\_12s0057g00980  
VIT\_06s0009g03770 VIT\_12s0057g01110  
VIT\_06s0009g03800 VIT\_12s0057g01160  
VIT\_06s0061g00020 VIT\_12s0057g01170  
VIT\_06s0061g00220 VIT\_12s0057g01400  
VIT\_06s0061g00270 VIT\_12s0059g00640  
VIT\_06s0061g00290 VIT\_12s0059g00690  
VIT\_06s0061g00340 VIT\_12s0059g00930  
VIT\_06s0061g00560 VIT\_12s0059g00980  
VIT\_06s0061g00790 VIT\_12s0059g01000  
VIT\_06s0061g01220 VIT\_12s0059g01200  
VIT\_06s0080g00020 VIT\_12s0059g01800  
VIT\_06s0080g00210 VIT\_12s0059g02030  
VIT\_06s0080g00250 VIT\_12s0059g02320  
VIT\_06s0080g00440 VIT\_12s0059g02530  
VIT\_06s0080g00450 VIT\_12s0059g02710  
VIT\_06s0080g00660 VIT\_12s0121g00060  
VIT\_06s0080g00740 VIT\_12s0121g00080  
VIT\_06s0080g00810 VIT\_12s0134g00400  
VIT\_06s0080g00940 VIT\_12s0134g00420  
VIT\_06s0080g01150 VIT\_12s0142g00070  
VIT\_06s0080g01210 VIT\_12s0142g00330  
VIT\_06s0080g01220 VIT\_12s0142g00400  
VIT\_06s0080g01230 VIT\_12s0142g00700  
VIT\_06s0080g01270 VIT\_12s0178g00040  
VIT\_07s0005g00020 VIT\_13s0019g00010  
VIT\_07s0005g00140 VIT\_13s0019g00110  
VIT\_07s0005g00160 VIT\_13s0019g00300  
VIT\_07s0005g00180 VIT\_13s0019g00310  
VIT\_07s0005g00240 VIT\_13s0019g00410  
VIT\_07s0005g00270 VIT\_13s0019g00670  
VIT\_07s0005g00280 VIT\_13s0019g00680  
VIT\_07s0005g00510 VIT\_13s0019g00810  
VIT\_07s0005g00670 VIT\_13s0019g01090  
VIT\_07s0005g00930 VIT\_13s0019g01120  
VIT\_07s0005g00980 VIT\_13s0019g01300  
VIT\_07s0005g01080 VIT\_13s0019g01340  
VIT\_07s0005g01220 VIT\_13s0019g01670  
VIT\_07s0005g01390 VIT\_13s0019g01840  
VIT\_07s0005g01540 VIT\_13s0019g02100  
VIT\_07s0005g01560 VIT\_13s0019g02280  
VIT\_07s0005g01570 VIT\_13s0019g02360  
VIT\_07s0005g01630 VIT\_13s0019g02500  
VIT\_07s0005g01740 VIT\_13s0019g03220  
VIT\_07s0005g01770 VIT\_13s0019g03270  
VIT\_07s0005g01900 VIT\_13s0019g03550  
VIT\_07s0005g01970 VIT\_13s0019g03600  
VIT\_07s0005g01980 VIT\_13s0019g03860  
VIT\_07s0005g01990 VIT\_13s0019g03870  
VIT\_07s0005g02010 VIT\_13s0019g04100  
VIT\_07s0005g02030 VIT\_13s0019g04170  
VIT\_07s0005g02110 VIT\_13s0019g04290  
VIT\_07s0005g02120 VIT\_13s0019g04380  
VIT\_07s0005g02190 VIT\_13s0019g04430  
VIT\_07s0005g02200 VIT\_13s0019g04520  
VIT\_07s0005g02210 VIT\_13s0019g04710

VIT\_05s0094g00900 VIT\_05s0020g02600  
VIT\_05s0094g00920 VIT\_05s0020g02710  
VIT\_05s0094g00930 VIT\_05s0020g02720  
VIT\_05s0094g00950 VIT\_05s0020g02840  
VIT\_05s0094g01100 VIT\_05s0020g02900  
VIT\_05s0094g01120 VIT\_05s0020g03010  
VIT\_05s0094g01200 VIT\_05s0020g03020  
VIT\_05s0094g01210 VIT\_05s0020g03050  
VIT\_05s0094g01280 VIT\_05s0020g03060  
VIT\_05s0094g01290 VIT\_05s0020g03070  
VIT\_05s0094g01320 VIT\_05s0020g03320  
VIT\_05s0094g01370 VIT\_05s0020g03330  
VIT\_05s0094g01490 VIT\_05s0020g03440  
VIT\_05s0094g01570 VIT\_05s0020g03480  
VIT\_05s0094g01590 VIT\_05s0020g03510  
VIT\_05s0094g01620 VIT\_05s0020g03530  
VIT\_05s0102g00200 VIT\_05s0020g03570  
VIT\_05s0102g00230 VIT\_05s0020g03620  
VIT\_05s0102g00530 VIT\_05s0020g03630  
VIT\_05s0102g00710 VIT\_05s0020g03740  
VIT\_05s0102g00940 VIT\_05s0020g03800  
VIT\_05s0102g00950 VIT\_05s0020g03820  
VIT\_05s0102g00970 VIT\_05s0020g03850  
VIT\_05s0102g01000 VIT\_05s0020g04090  
VIT\_05s0102g01030 VIT\_05s0020g04200  
VIT\_05s0102g01140 VIT\_05s0020g04400  
VIT\_05s0102g01170 VIT\_05s0020g04470  
VIT\_05s0124g00140 VIT\_05s0020g04580  
VIT\_05s0136g00100 VIT\_05s0020g04590  
VIT\_05s0136g00290 VIT\_05s0020g04600  
VIT\_05s0165g00010 VIT\_05s0020g04620  
VIT\_06s0004g00030 VIT\_05s0020g04660  
VIT\_06s0004g00050 VIT\_05s0020g04710  
VIT\_06s0004g00060 VIT\_05s0020g04760  
VIT\_06s0004g00070 VIT\_05s0020g04770  
VIT\_06s0004g00100 VIT\_05s0020g04830  
VIT\_06s0004g00110 VIT\_05s0020g04850  
VIT\_06s0004g00160 VIT\_05s0020g04920  
VIT\_06s0004g00230 VIT\_05s0029g00130  
VIT\_06s0004g00300 VIT\_05s0029g00340  
VIT\_06s0004g00400 VIT\_05s0029g00350  
VIT\_06s0004g00430 VIT\_05s0029g00450  
VIT\_06s0004g00480 VIT\_05s0029g00490  
VIT\_06s0004g00570 VIT\_05s0029g00520  
VIT\_06s0004g00620 VIT\_05s0029g00550  
VIT\_06s0004g00760 VIT\_05s0029g00600  
VIT\_06s0004g00840 VIT\_05s0029g00630  
VIT\_06s0004g00880 VIT\_05s0029g00650  
VIT\_06s0004g01000 VIT\_05s0029g00740  
VIT\_06s0004g01020 VIT\_05s0029g01060  
VIT\_06s0004g01090 VIT\_05s0029g01120  
VIT\_06s0004g01120 VIT\_05s0029g01130  
VIT\_06s0004g01200 VIT\_05s0029g01410  
VIT\_06s0004g01290 VIT\_05s0029g01430  
VIT\_06s0004g01400 VIT\_05s0029g01500  
VIT\_06s0004g01480 VIT\_05s0029g01570  
VIT\_06s0004g01530 VIT\_05s0029g01580

|                   |                    |                   |                   |
|-------------------|--------------------|-------------------|-------------------|
| VIT_07s0005g02300 | VIT_13s0019g04720  | VIT_06s0004g01550 | VIT_05s0049g00090 |
| VIT_07s0005g02600 | VIT_13s0019g04770  | VIT_06s0004g01600 | VIT_05s0049g00250 |
| VIT_07s0005g02640 | VIT_13s0019g04810  | VIT_06s0004g01640 | VIT_05s0049g00260 |
| VIT_07s0005g02650 | VIT_13s0019g05250  | VIT_06s0004g01650 | VIT_05s0049g00310 |
| VIT_07s0005g02740 | VIT_13s0019g05390  | VIT_06s0004g01670 | VIT_05s0049g00400 |
| VIT_07s0005g02790 | VIT_13s0047g00030  | VIT_06s0004g01700 | VIT_05s0049g00420 |
| VIT_07s0005g02830 | VIT_13s0047g00040  | VIT_06s0004g01740 | VIT_05s0049g00470 |
| VIT_07s0005g02990 | VIT_13s0047g000490 | VIT_06s0004g01770 | VIT_05s0049g00510 |
| VIT_07s0005g03040 | VIT_13s0047g000510 | VIT_06s0004g01790 | VIT_05s0049g00550 |
| VIT_07s0005g03110 | VIT_13s0047g01050  | VIT_06s0004g01890 | VIT_05s0049g00810 |
| VIT_07s0005g03190 | VIT_13s0047g01090  | VIT_06s0004g01910 | VIT_05s0049g00960 |
| VIT_07s0005g03250 | VIT_13s0064g00160  | VIT_06s0004g02120 | VIT_05s0049g01020 |
| VIT_07s0005g03260 | VIT_13s0064g00170  | VIT_06s0004g02280 | VIT_05s0049g01130 |
| VIT_07s0005g03290 | VIT_13s0064g00200  | VIT_06s0004g02320 | VIT_05s0049g01270 |
| VIT_07s0005g03330 | VIT_13s0064g00290  | VIT_06s0004g02330 | VIT_05s0049g01500 |
| VIT_07s0005g03430 | VIT_13s0064g00390  | VIT_06s0004g02360 | VIT_05s0049g01570 |
| VIT_07s0005g03520 | VIT_13s0064g00450  | VIT_06s0004g02370 | VIT_05s0049g01580 |
| VIT_07s0005g03800 | VIT_13s0064g00510  | VIT_06s0004g02580 | VIT_05s0049g01620 |
| VIT_07s0005g03810 | VIT_13s0064g00610  | VIT_06s0004g02600 | VIT_05s0049g01690 |
| VIT_07s0005g03880 | VIT_13s0064g00800  | VIT_06s0004g02620 | VIT_05s0049g01810 |
| VIT_07s0005g03900 | VIT_13s0064g01050  | VIT_06s0004g02630 | VIT_05s0049g01820 |
| VIT_07s0005g03930 | VIT_13s0064g01180  | VIT_06s0004g02690 | VIT_05s0049g01880 |
| VIT_07s0005g03940 | VIT_13s0064g01300  | VIT_06s0004g02740 | VIT_05s0049g01900 |
| VIT_07s0005g04040 | VIT_13s0064g01460  | VIT_06s0004g02770 | VIT_05s0049g01960 |
| VIT_07s0005g04070 | VIT_13s0064g01470  | VIT_06s0004g02800 | VIT_05s0049g01980 |
| VIT_07s0005g04150 | VIT_13s0067g00060  | VIT_06s0004g02810 | VIT_05s0049g02120 |
| VIT_07s0005g04230 | VIT_13s0067g000490 | VIT_06s0004g02820 | VIT_05s0049g02210 |
| VIT_07s0005g04390 | VIT_13s0067g000940 | VIT_06s0004g02850 | VIT_05s0049g02220 |
| VIT_07s0005g04700 | VIT_13s0067g01210  | VIT_06s0004g02870 | VIT_05s0049g02240 |
| VIT_07s0005g04760 | VIT_13s0067g01290  | VIT_06s0004g02940 | VIT_05s0049g02300 |
| VIT_07s0005g04860 | VIT_13s0067g01440  | VIT_06s0004g03080 | VIT_05s0051g00090 |
| VIT_07s0005g04870 | VIT_13s0067g01510  | VIT_06s0004g03130 | VIT_05s0051g00140 |
| VIT_07s0005g05150 | VIT_13s0067g02070  | VIT_06s0004g03190 | VIT_05s0051g00150 |
| VIT_07s0005g05690 | VIT_13s0067g02230  | VIT_06s0004g03210 | VIT_05s0051g00170 |
| VIT_07s0005g05810 | VIT_13s0067g02250  | VIT_06s0004g03240 | VIT_05s0051g00190 |
| VIT_07s0005g05820 | VIT_13s0067g02560  | VIT_06s0004g03260 | VIT_05s0051g00330 |
| VIT_07s0005g05850 | VIT_13s0067g02990  | VIT_06s0004g03420 | VIT_05s0051g00380 |
| VIT_07s0005g06420 | VIT_13s0067g03110  | VIT_06s0004g03510 | VIT_05s0051g00460 |
| VIT_07s0005g06670 | VIT_13s0067g03180  | VIT_06s0004g03550 | VIT_05s0051g00490 |
| VIT_07s0005g06720 | VIT_13s0067g03220  | VIT_06s0004g03580 | VIT_05s0051g00530 |
| VIT_07s0005g06730 | VIT_13s0067g03440  | VIT_06s0004g03620 | VIT_05s0051g00680 |
| VIT_07s0031g00210 | VIT_13s0067g03620  | VIT_06s0004g03700 | VIT_05s0051g00720 |
| VIT_07s0031g00240 | VIT_13s0067g03660  | VIT_06s0004g03870 | VIT_05s0051g00860 |
| VIT_07s0031g00330 | VIT_13s0067g03880  | VIT_06s0004g04000 | VIT_05s0051g00980 |
| VIT_07s0031g00600 | VIT_13s0073g00290  | VIT_06s0004g04020 | VIT_05s0062g00220 |
| VIT_07s0031g00680 | VIT_13s0073g00310  | VIT_06s0004g04200 | VIT_05s0062g00250 |
| VIT_07s0031g00750 | VIT_13s0073g00440  | VIT_06s0004g04230 | VIT_05s0062g00500 |
| VIT_07s0031g00790 | VIT_13s0073g00490  | VIT_06s0004g04370 | VIT_05s0062g00720 |
| VIT_07s0031g00830 | VIT_13s0074g00030  | VIT_06s0004g04420 | VIT_05s0062g00740 |
| VIT_07s0031g01340 | VIT_13s0074g00100  | VIT_06s0004g04490 | VIT_05s0062g00790 |
| VIT_07s0031g01400 | VIT_13s0074g00430  | VIT_06s0004g04530 | VIT_05s0062g00890 |
| VIT_07s0031g01580 | VIT_13s0074g00590  | VIT_06s0004g04700 | VIT_05s0062g00900 |
| VIT_07s0031g01620 | VIT_13s0074g00710  | VIT_06s0004g04720 | VIT_05s0062g01000 |
| VIT_07s0031g01660 | VIT_13s0074g00740  | VIT_06s0004g04800 | VIT_05s0062g01010 |
| VIT_07s0031g01670 | VIT_13s0084g00070  | VIT_06s0004g04920 | VIT_05s0062g01030 |
| VIT_07s0031g01760 | VIT_13s0084g00150  | VIT_06s0004g04930 | VIT_05s0062g01040 |
| VIT_07s0031g01770 | VIT_13s0084g00170  | VIT_06s0004g05020 | VIT_05s0062g01050 |
